# Supplementary material
Source: Springer Nature journal article supplement (https://www.springermedizin.de/resource/supplementary/13041_2008_6_MOESM2_ESM.pdf/25657362)
Supplement: MOESM2 [file 25657362]

# Table S1

| AFID         | GeneSymbol    | GeneName                                                                        | ContigStart | ContigEnd   | AssayEffect | ContigStart/AssayEffect | FoldChange  |
|--------------|---------------|---------------------------------------------------------------------------------|-------------|-------------|-------------|-------------------------|-------------|
| 1435494_a_at | Ddp           | desmoplamin                                                                     | 7.8082E-13  | 0.0269849   | 0.0762722   | 0.0380440               | 0.0380440   |
| 1419093_a_at | Tol2          | tryptophan 2,3-dioxygenase                                                      | 2.58935E-12 | 0.0222035   | 0.140441    | 0.09183759              | 0.09183759  |
| 1452107_a_at | Npat          | neptunium                                                                       | 4.88022E-11 | 0.0237779   | 0.232854    | 0.15621508              | 0.15621508  |
| 1435493_a_at | Ddp           | desmoplamin                                                                     | 2.09973E-10 | 0.6083208   | 0.35077     | 0.036149346             | 0.036149346 |
| 1433681_a_at | CAPN3         | CALPAIN 3                                                                       | 3.45309E-10 | 0.1529352   | 0.2590779   | 0.400097718             | 0.400097718 |
| 1419353_a_at | NIH1H         | NEBESCENT HELIX LOOP HELIX 1                                                    | 5.09421E-10 | 0.6557419   | 0.1809421   | 0.606206172             | 0.606206172 |
| 1440849_a_at | 6330417G04RIK | RIKEN CDNA 6330417G04 GENE                                                      | 2.61509E-09 | 0.08842818  | 0.1563052   | 0.617701168             | 0.617701168 |
| 1448738_a_at | Calb1         | calbindin-28K                                                                   | 2.85029E-09 | 0.004076686 | 0.9237763   | 0.541333043             | 0.541333043 |
| 1450954_a_at | Htr1a         | 5-hydroxytryptamine (serotonin) receptor 1A                                     | 3.2861E-09  | 0.2501676   | 0.399841    | 0.485892327             | 0.485892327 |
| 1437125_a_at | Cam2a         | calcium/calmodulin-dependent protein kinase II alpha                            | 5.14192E-09 | 0.0332322   | 0.741775    | 0.557552024             | 0.557552024 |
| 1457366_a_at | 4931407K02RIK | RIKEN CDNA 4931407K02 GENE                                                      | 5.42526E-09 | 0.0151514   | 0.0177448   | 0.37503591              | 0.37503591  |
| 1437226_a_at | Marcks1       | MARCKS-like 1                                                                   | 6.20397E-09 | 1.21985E-05 | 0.3843127   | 0.464735895             | 0.464735895 |
| 1425053_a_at | Isoe1         | isochorismatase domain containing 1                                             | 8.51862E-09 | 0.3058534   | 0.4995614   | 0.541751189             | 0.541751189 |
| 1448950_a_at | IL1R1         | INTERLEUKIN 1 RECEPTOR, TYPE I                                                  | 1.94144E-08 | 0.0100275   | 0.06881165  | 0.193789662             | 0.193789662 |
| 1422711_a_at | DNCK          | pregnancy upregulated non-abruptly expressed CaM kinase                         | 2.01359E-08 | 0.941677    | 0.468097    | 0.95269617              | 0.95269617  |
| 1428809_a_at | 1810010H24RIK | RIKEN CDNA 1810010H24 GENE                                                      | 2.16699E-08 | 0.4806871   | 0.1636789   | 0.366818765             | 0.366818765 |
| 1449854_a_at | A1838259      | EXPRESSED SEQUENCE A1838259                                                     | 2.5192E-08  | 0.8249145   | 0.1467698   | 0.482725912             | 0.482725912 |
| 1419355_a_at | Smoc2         | SPARC-related modular calcium binding 2                                         | 3.61754E-08 | 0.9553183   | 0.4829796   | 0.682937906             | 0.682937906 |
| 1431362_a_at | Smoc2         | SPARC-related modular calcium binding 2                                         | 5.27571E-08 | 0.4286949   | 0.231905    | 0.410280495             | 0.410280495 |
| 1436532_a_at | DCAMK1.3      | DOUBLECORTIN AND CAM KINASE-LIKE 3                                              | 6.15391E-08 | 0.1007432   | 0.236967    | 0.508840335             | 0.508840335 |
| 1429355_a_at | 130609K11RIK  | RIKEN CDNA 130609K11 GENE                                                       | 8.2977E-08  | 0.3581192   | 0.0799313   | 1.89525709              | 1.89525709  |
| 1444150_a_at | Epb4.1        | erythrocyte protein band 4.1                                                    | 2.00194E-07 | 0.8057454   | 0.480825    | 2.452332943             | 2.452332943 |
| 1418110_a_at | INPP5D        | INOSITOL POLYPHOSPHATE-5-PHOSPHATASE 4                                          | 2.39076E-07 | 0.00386617  | 0.2986411   | 1.514745934             | 1.514745934 |
| 1437991_a_at | ACCN4         | AMILORIDE-SENSITIVE CATION CHANNEL 4, PITUITARY                                 | 2.82406E-07 | 0.9173669   | 0.181897    | 1.708657524             | 1.708657524 |
| 1426601_a_at | SCL37A1       | SOLUTE CARRIER FAMILY 37 (GLYCEROL-3-PHOSPHATE TRANSPORTER), MEMBER 1           | 5.49997E-07 | 0.3082207   | 0.1370467   | 2.364293397             | 2.364293397 |
| 1436127_a_at | CRHRP         | CORTICOTROPIN RELEASING HORMONE BINDING PROTEIN                                 | 6.14282E-07 | 0.306857    | 0.9208977   | 0.52481244              | 0.52481244  |
| 1429162_a_at | 1500015A07RIK | RIKEN CDNA 1500015A07 GENE                                                      | 6.21154E-07 | 0.4452592   | 0.231881    | 0.496739883             | 0.496739883 |
| 1417391_a_at | Ifi16         | interferon 16                                                                   | 7.34573E-07 | 0.001492084 | 0.6991007   | 0.52278757              | 0.52278757  |
| 145145_a_at  | ---           | ---                                                                             | 7.51534E-07 | 0.2222331   | 0.6077884   | 0.619888207             | 0.619888207 |
| 141414_a_at  | ntng1         | netrin G1                                                                       | 1.14888E-06 | 0.1134961   | 0.2497985   | 0.95798957              | 0.95798957  |
| 142278_a_at  | Dgat2         | diacylglycerol O-acyltransferase 2                                              | 1.13174E-06 | 0.0106925   | 0.7783189   | 0.538616367             | 0.538616367 |
| 1431946_a_at | Apa42p        | amyloid beta (A4) precursor protein-binding, family A, member 1 binding protein | 1.41164E-06 | 0.174008    | 0.212282    | 2.327988901             | 2.327988901 |
| 1437965_a_at | Sytn13        | synaptotagmin 13                                                                | 1.5136E-06  | 0.000170011 | 0.472751    | 1.711818481             | 1.711818481 |
| 1455401_a_at | Camk2b        | calcium/calmodulin-dependent protein kinase kinase 2, beta                      | 1.62224E-06 | 0.0782373   | 0.4999253   | 1.516324078             | 1.516324078 |
| 1424674_a_at | Slc39a6       | solute carrier family 39 (metal ion transporter), member 6                      | 1.72099E-06 | 0.0597446   | 0.778477    | 0.498328603             | 0.498328603 |
| 1434129_a_at | Ihpk2         | lipoma HMGIC fusion partner-like 2                                              | 1.92298E-06 | 0.0776529   | 0.648051    | 0.64805159              | 0.64805159  |
| 1425863_a_at | Ptpn22        | protein tyrosine phosphatase, receptor type, O                                  | 2.51724E-06 | 9.4225E-09  | 0.189927    | 1.37879731              | 1.37879731  |
| 1416072_a_at | CD34          | CD34 ANTIGEN                                                                    | 2.53628E-06 | 0.000856461 | 0.2862298   | 1.58295522              | 1.58295522  |
| 1418809_a_at | FR3A          | PAIRED-GL-LIKE RECEPTOR A1                                                      | 2.60244E-06 | 0.1681435   | 0.1078049   | 0.18722786              | 0.18722786  |
| 1425232_a_at | Ar2           | arrestin 3, retinal                                                             | 2.97602E-06 | 0.9702853   | 0.5481091   | 0.47538628              | 0.47538628  |
| 1483310_a_at | ---           | ---                                                                             | 3.10494E-06 | 0.2043566   | 0.7407074   | 0.481302606             | 0.481302606 |
| 1416251_a_at | Mcm6          | minichromosome maintenance deficient 6 (MISS homolog, S. pombe) (S. cerevisiae) | 3.17964E-06 | 0.00025121  | 0.240123    | 1.582450003             | 1.582450003 |
| 1460043_a_at | ---           | ---                                                                             | 3.41445E-06 | 0.01072407  | 0.626092    | 0.957780102             | 0.957780102 |
| 1460437_a_at | PRC2          | PLECKSTRIN HOMOLOG, SECT AND COILED-COIL DOMAINS 4                              | 3.55702E-06 | 0.00178774  | 0.0738535   | 0.475429166             | 0.475429166 |
| 1424255_a_at | GRP           | GASTRIN RELEASING PEPTIDE                                                       | 3.8937E-06  | 0.9191378   | 0.4079159   | 3.07325791              | 3.07325791  |
| 1448823_a_at | CXCL12        | CHEMOKINE (C-C motif) RANTES                                                    | 4.11537E-06 | 0.6771474   | 0.0731131   | 1.779142828             | 1.779142828 |
| 1457213_a_at | Dgkq          | diacylglycerol kinase, eta                                                      | 4.20891E-06 | 0.00148591  | 0.1814887   | 0.621852678             | 0.621852678 |
| 1440030_a_at | KCNT2         | POTASSIUM CHANNEL, SUBFAMILY T, MEMBER 2                                        | 4.74741E-06 | 0.00444551  | 0.3763487   | 2.243666984             | 2.243666984 |
| 1480219_a_at | Htr1a         | 5-hydroxytryptamine (serotonin) receptor 1A                                     | 5.02181E-06 | 0.6102558   | 0.5450719   | 0.545071923             | 0.545071923 |
| 1459525_a_at | PRDM8         | PR DOMAIN CONTAINING 8                                                          | 5.60895E-06 | 0.3823469   | 0.1309853   | 0.547159897             | 0.547159897 |
| 1417777_a_at | LTB4HD1       | LEUKOTRIENE B4 12-HYDROXYDEHYDROGENASE                                          | 6.8071E-06  | 0.121652    | 0.3300815   | 0.55243446              | 0.55243446  |
| 1434013_a_at | Alms1a3       | alms1 binding LIM protein family, member 3                                      | 6.80977E-06 | 0.7487033   | 0.6480813   | 0.648081367             | 0.648081367 |
| 1455082_a_at | Chb           | Casitas B-lineage lymphoma b                                                    | 8.5433E-06  | 0.02358481  | 0.697795    | 0.585212724             | 0.585212724 |
| 1424675_a_at | Slc39a6       | solute carrier family 39 (metal ion transporter), member 6                      | 9.44505E-06 | 0.00023991  | 0.1315532   | 0.653235998             | 0.653235998 |
| 1450329_a_at | Ar2           | arrestin 3, retinal                                                             | 9.74891E-06 | 0.2232856   | 0.23981     | 1.487125419             | 1.487125419 |
| 1451804_a_at | LRRFC16       | LEUCINE RICH REPEAT CONTAINING 16                                               | 1.03541E-05 | 0.6702009   | 0.4539123   | 0.759082193             | 0.759082193 |
| 1439378_a_at | Lsm11         | U7 snRNP-specific Sm-like protein LSM11                                         | 1.05261E-05 | 0.967071    | 0.9431416   | 1.461096612             | 1.461096612 |
| 1440761_a_at | SSBP2         | U7 snRNP-STRANDED DNA-BINDING PROTEIN 2                                         | 1.07582E-05 | 0.00802744  | 0.0861375   | 0.479202864             | 0.479202864 |
| 1439327_a_at | Csbn1         | collagen and calcium binding EGF domains 1                                      | 1.07872E-05 | 0.2876069   | 0.4668348   | 0.733230339             | 0.733230339 |
| 1429402_a_at | G08d2         | glycyltransferase 8 domain containing 2                                         | 1.14727E-05 | 0.0949919   | 0.6704487   | 0.542805203             | 0.542805203 |
| 1423915_a_at | OLEML2B       | OLEFACTOMYELIN-LIKE 2B                                                          | 1.27725E-05 | 0.0157589   | 0.0962076   | 0.684164121             | 0.684164121 |
| 1416658_a_at | Frzb          | frizzled-related protein                                                        | 1.29668E-05 | 0.01585719  | 0.622829    | 0.55597676              | 0.55597676  |
| 1443876_a_at | Camk2a        | Calcium/calmodulin-dependent protein kinase II alpha                            | 1.33961E-05 | 0.00416932  | 0.5472887   | 0.523393387             | 0.523393387 |
| 1419322_a_at | Marcks1       | MARCKS-like 1                                                                   | 1.43481E-05 | 0.3215486   | 0.1992545   | 0.67039513              | 0.67039513  |
| 1449337_a_at | Tol2          | tryptophan 2,3-dioxygenase                                                      | 1.43995E-05 | 0.2172683   | 0.368353    | 0.845791156             | 0.845791156 |
| 1438007_a_at | A1831790      | EXPRESSED SEQUENCE A1831790                                                     | 1.60133E-05 | 0.000213598 | 0.352793    | 0.673431713             | 0.673431713 |
| 1416266_a_at | PDYN          | PRODYNORPHIN                                                                    | 1.66676E-05 | 0.1619489   | 0.6768647   | 1.699686621             | 1.699686621 |
| 1426277_a_at | Dgat2         | diacylglycerol O-acyltransferase 2                                              | 1.72824E-05 | 0.0471127   | 0.9901446   | 0.9901446               | 0.9901446   |
| 1426712_a_at | SLLCA15       | SOLUTE CARRIER FAMILY 6 (NEUROTRANSMITTER TRANSPORTER), MEMBER 15               | 1.76109E-05 | 0.6700746   | 0.1279997   | 0.711545032             | 0.711545032 |
| 1423494_a_at | 2310042I22RIK | RIKEN CDNA 2310042I22 GENE                                                      | 1.81197E-05 | 0.3257314   | 0.192636    | 2.09567208              | 2.09567208  |
| 1433898_a_at | At2p2c        | AT2p2c C++ transmembrane plasma membrane 2                                      | 1.82046E-05 | 0.7480794   | 0.12972496  | 1.2972496               | 1.2972496   |
| 1456656_a_at | Lin7a         | lin-7 homolog A (C. elegans)                                                    | 2.04534E-05 | 0.02926636  | 0.7919776   | 1.583414364             | 1.583414364 |
| 1436858_a_at | MBNL1         | MUSCLE-BINDING-LIKE 2                                                           | 2.08747E-05 | 2.79143E-12 | 0.4221382   | 1.0846619               | 1.0846619   |
| 1419230_a_at | Kat5          | katana 1                                                                        | 2.14864E-05 | 0.0898405   | 0.7699254   | 1.957100255             | 1.957100255 |
| 1457311_a_at | Cam2a         | calcium/calmodulin-dependent protein kinase II alpha                            | 2.15093E-05 | 0.514289    | 0.5180424   | 0.54550081              | 0.54550081  |
| 1438019_a_at | IPPK          | INOSITOL 1,3,4,5,6-PENTAKISPHOSPHATE 2-KINASE                                   | 2.28765E-05 | 0.002148871 | 0.0975466   | 0.75486655              | 0.75486655  |
| 1423233_a_at | C/EBPD        | C/CAAT-ENHANCER BINDING PROTEIN (C/EBP), DELTA                                  | 2.30643E-05 | 0.08577387  | 0.5107893   | 0.5107893               | 0.5107893   |
| 1445124_a_at | A930009L07RIK | RIKEN CDNA A930009L07 GENE                                                      | 2.48877E-05 | 0.02757881  | 0.5508991   | 0.66165234              | 0.66165234  |
| 1428397_a_at | R3gap5        | UDP-Gal beta(6)GlcNAc beta 1,3-galactosyltransferase, polypeptide 5             | 2.6742E-05  | 0.0348475   | 0.9144667   | 0.722238905             | 0.722238905 |
| 1450195_a_at | Ndel1         | N-decylglycyl-N-sulfotransferase (heparan glucosaminyl) 4                       | 2.8449E-05  | 0.0424969   | 0.1431482   | 0.4742799               | 0.4742799   |
| 1451753_a_at | Ptxn2         | ptx2n A2                                                                        | 3.06327E-05 | 0.02522E-05 | 0.112631    | 1.250933101             | 1.250933101 |
| 1440099_a_at | ---           | ---                                                                             | 3.22951E-05 | 0.00109391  | 0.0760926   | 0.336751923             | 0.336751923 |
| 1459626_a_at | G08d2         | glycyltransferase 8 domain containing 2                                         | 3.31418E-05 | 0.1243535   | 0.0992328   | 1.213746379             | 1.213746379 |
| 1429403_a_at | G08d2         | glycyltransferase 8 domain containing 2                                         | 3.49897E-05 | 0.281869    | 0.366182    | 0.530489975             | 0.530489975 |
| 1435705_a_at | LOC232875     | SIMILAR TO HYPOPHYSALIN PROTEIN FLJ12895                                        | 3.62199E-05 | 0.1875445   | 0.4534812   | 0.675737377             | 0.675737377 |
| 1429191_a_at | Dlx3          | DLX3 (Asp-Glu-Ala-His) box polypeptide 33                                       | 3.66729E-05 | 0.0433907   | 0.1736216   | 0.630481735             | 0.630481735 |
| 1451547_a_at | 0610009A07RIK | RIKEN CDNA 0610009A07 GENE                                                      | 3.72976E-05 | 0.00271349  | 0.286474    | 0.604340175             | 0.604340175 |
| 1431230_a_at | Ptxn2         | PTB (POZ) domain containing 9                                                   | 3.75617E-05 | 3.83021E-08 | 0.2864805   | 0.629897112             | 0.629897112 |
| 1448473_a_at | Ar2 // Dhrs2  | 5-azacytidine induced gene 2 // DIRAS family, GTP-binding RAS-like 2            | 3.88424E-05 | 0.000499719 | 0.1423418   | 1.5804349               | 1.5804349   |
| 1438852_a_at | Mcm6          | minichromosome maintenance deficient 6 (MISS homolog, S. pombe) (S. cerevisiae) | 3.88843E-05 | 0.4745971   | 0.7699254   | 0.957780102             | 0.957780102 |
| 1437075_a_at | FRMD3         | FERM DOMAIN CONTAINING 3                                                        | 4.09977E-05 | 0.319474    | 0.936535    | 2.56703778              | 2.56703778  |
| 1456651_a_at | Drd1a         | dequamine receptor 1A                                                           | 4.39717E-05 | 0.924668    | 0.06431629  | 1.91917514              | 1.91917514  |
| 1455721_a_at | ALKK3B1       | ALKK3 ALKYLATION REPAIR HOMOLOG 3 (E. COLI)                                     | 4.61193E-05 | 0.05782602  | 0.3280749   | 0.55895874              | 0.55895874  |
| 1448246_a_at | HIDAC1        | HISTONE DEACETYLASE 1 PSEUDOGENE                                                | 4.64543E-05 | 0.5066967   | 0.761297    | 0.7101007               | 0           |

|              |                      |                                                                                                                                   |              |             |             |              |
|--------------|----------------------|-----------------------------------------------------------------------------------------------------------------------------------|--------------|-------------|-------------|--------------|
| 1417355_at   | PEG3                 | PATERNALLY EXPRESSED 3                                                                                                            | 0.0002062016 | 0.05291179  | 0.1889134   | 1.218296896  |
| 1414245_at   | 261020170717R1K      | RIKEN cDNA 261020170717                                                                                                           | 0.000206789  | 9.49313E-05 | 0.2398047   | 0.6236958    |
| 1456093_at   | ZFP536               | ZINC FINGER PROTEIN 536                                                                                                           | 0.00020204   | 0.2270198   | 0.3588086   | 1.46097566   |
| 1454966_at   | Igfb3                | integrin alpha 8                                                                                                                  | 0.000206307  | 0.0118105   | 0.6133862   | 0.574379585  |
| 1452703_at   | 4631427C17R1K        | RIKEN cDNA 4631427C17                                                                                                             | 0.000206550  | 0.2425378   | 0.6483187   | 0.68381194   |
| 1441166_at   | A330050F15R1K        | RIKEN cDNA A330050F15                                                                                                             | 0.000202624  | 0.2647657   | 0.802525    | 0.724306381  |
| 1429022_at   | ADCYAP1R1            | ADENYLATE CYCLASE ACTIVATING POLYPEPTIDE 1 RECEPTOR 1                                                                             | 0.000202361  | 0.9115902   | 0.3494843   | 0.74535617   |
| 1416156_at   | DNAH11               | DNAH1 (IRP49)/HOMOLOG, SUBFAMILY B, MEMBER 1                                                                                      | 0.000202458  | 0.3317747   | 0.1873575   | 1.2506207    |
| 1447340_at   | 4631408O11R1K        | RIKEN cDNA 4631408O11                                                                                                             | 0.000302296  | 0.2195051   | 0.06031197  | 2.062618622  |
| 1448608_at   | Ccnd1                | cyclin D1                                                                                                                         | 0.000302403  | 0.393879    | 0.7540753   | 1.3760863    |
| 1423596_at   | Nck6 // LOC674247    | NIMA (never in mitosis gene a)-related expressed kinase 6 // similar to NIMA (never in mitosis gene a)-related expressed kinase 6 | 0.000306777  | 0.00723489  | 0.7444122   | 0.71409482   |
| 1451354_at   | SCGN                 | SIGNAL CELL GROWTH FACTOR-INDUCED CYCLIN BINDING PROTEIN                                                                          | 0.000317693  | 0.0789603   | 0.6362326   | 0.661131168  |
| 142157_at    | A930041H05R1K        | RIKEN cDNA A930041H05                                                                                                             | 0.000301041  | 0.002763003 | 0.1362671   | 1.441245159  |
| 1457558_at   | A330050F15R1K        | RIKEN cDNA A330050F15                                                                                                             | 0.000303041  | 0.28354059  | 0.4543908   | 0.56222826   |
| 1447491_at   | LRRC2D               | LEUCINE RICH REPEAT CONTAINING RD                                                                                                 | 0.000317316  | 0.009276419 | 0.1578963   | 1.801824396  |
| 1428602_at   | Kcnp9                | potassium inwardly-rectifying channel, subfamily J, member 9                                                                      | 0.000317425  | 0.02328887  | 0.087541    | 1.3312311    |
| 1438326_at   | A330001M20R1K        | RIKEN cDNA A330001M20                                                                                                             | 0.000338007  | 8.18806E-09 | 0.2939136   | 0.765387133  |
| 1416793_at   | Tfcd1                | TROPOCALCIN 1                                                                                                                     | 0.000342519  | 4.27467E-06 | 0.9121351   | 0.779442328  |
| 1444422_at   | Pcdh19               | protocadherin 19                                                                                                                  | 0.000348332  | 0.1025842   | 0.9653787   | 0.749036762  |
| 1459619_at   | EPHA11.2             | ERYTHROCYTE PROTEIN BAND 4.1-LIKE 2                                                                                               | 0.000350994  | 0.6647238   | 0.7158628   | 1.47049762   |
| 1419730_at   | 4631427C17R1K        | RIKEN cDNA 4631427C17                                                                                                             | 0.000356659  | 0.2005454   | 0.7105472   | 0.650281127  |
| 1440656_at   | Flsht7               | F-box only protein 7                                                                                                              | 0.000357627  | 0.5241263   | 0.7801649   | 0.667134382  |
| 1435111_at   | LRG1                 | LEUCINE-RICH ALPHA-2-GLYCOPROTEIN 1                                                                                               | 0.000364407  | 0.2667043   | 0.391235    | 1.361893487  |
| 1417290_at   | PRSS35               | PROTEASE, SERINE, 35                                                                                                              | 0.000370403  | 0.0825122   | 0.828202    | 3.89275294   |
| 1434195_at   | CMKOR1               | CHEMOKINE ORPHAN RECEPTOR 1                                                                                                       | 0.000372919  | 0.5365725   | 0.572982    | 0.656345332  |
| 1417625_x_at | GLE3A4               | GLI3 ACTOMERIN 4                                                                                                                  | 0.000384652  | 0.5330373   | 0.7121008   | 0.616383672  |
| 1437960_at   | Apod4l               | adenomatous polyposis coli down-regulated 1                                                                                       | 0.000390853  | 0.7797704   | 0.494543    | 0.625849096  |
| 1449070_x_at | Ln7a                 | lin-7 homolog (A. elegans)                                                                                                        | 0.000405235  | 0.00345898  | 0.2586282   | 0.6832348    |
| 1438450_at   | Ln7a                 | lin-7 homolog (A. elegans)                                                                                                        | 0.00041516   | 0.3593095   | 0.0886646   | 1.459101335  |
| 142009_at    | NWCC1                | CINA SEQUENCE BINDING PROTEIN 8                                                                                                   | 0.000446985  | 0.8091927   | 0.2482287   | 1.248228747  |
| 1438075_at   | FEM1C                | FEM-1 HOMOLOG C (C. ELEGANS)                                                                                                      | 0.000448166  | 0.1587452   | 0.1464097   | 1.283708176  |
| 1437568_at   | MMP16                | MATRIX METALLOPROTEINASE 16                                                                                                       | 0.000448307  | 0.94702E-05 | 0.6664409   | 0.727551022  |
| 1438304_at   | PCDH21               | PROTOCOLADHERIN 21                                                                                                                | 0.00045411   | 0.2810025   | 0.5333385   | 0.902212374  |
| 1431393_at   | SEMO181              | RIKEN cDNA 492150402 GENE                                                                                                         | 0.000458129  | 0.00632623  | 0.5107176   | 0.657898618  |
| 1431905_x_at | 4933427G17R1K        | RIKEN cDNA 4933427G17                                                                                                             | 0.000458758  | 0.1262748   | 0.8708775   | 0.559363798  |
| 1432225_at   | ACVRC1               | ACTIVIN A RECEPTOR, TYPE 1C                                                                                                       | 0.000460009  | 0.9352097   | 0.705102    | 1.7698907    |
| 1433939_at   | A73004616            | HYPOPHYSICAL PROTEIN A73004616                                                                                                    | 0.000460733  | 0.26094673  | 0.6483187   | 1.31765128   |
| 1421471_at   | NPY1R                | NEUROPEPTIDE Y RECEPTOR Y1                                                                                                        | 0.000467232  | 0.4101227   | 0.8948635   | 1.631051881  |
| 1439689_at   | 903022AM15R1K        | RIKEN cDNA 903022AM15                                                                                                             | 0.00046992   | 0.01180232  | 0.0560524   | 1.33392111   |
| 1426146_at   | Itihg                | interleukin 1 receptor accessory protein                                                                                          | 0.000476572  | 0.07927656  | 0.697048429 | 0.744384427  |
| 1428657_at   | Reb1                 | retinoblastoma 1 receptor accessory protein 1                                                                                     | 0.00048732   | 0.2699668   | 0.8661403   | 0.577384327  |
| 1457729_at   | GRP12                | G-PROTEIN COUPLED RECEPTOR 12                                                                                                     | 0.000495968  | 0.9066335   | 0.4783524   | 0.72022285   |
| 1442931_at   | Gc1d3                | keratin 12                                                                                                                        | 0.000511281  | 0.792136    | 0.1878262   | 1.740404103  |
| 1440215_at   | C130086A10           | HYPOPHYSICAL PROTEIN C130086A10                                                                                                   | 0.000517376  | 0.03162541  | 0.0605104   | 0.710720872  |
| 1443196_at   | ---                  | ---                                                                                                                               | 0.000523461  | 0.009679651 | 0.1188838   | 1.66151737   |
| 1439019_at   | Frsd1                | Frsr syndrome 1 homolog (human)                                                                                                   | 0.000525375  | 0.8039165   | 0.147698967 | 1.476709895  |
| 1451972_at   | Glc1c1               | glucocorticoid induced transcript 1                                                                                               | 0.000526784  | 0.7234774   | 0.7650407   | 1.349952898  |
| 1424042_at   | Alp2b2               | ATPase, Ca++ transporting, plasma membrane 2                                                                                      | 0.00052826   | 0.00150443  | 0.206829    | 1.58026223   |
| 1438399_at   | Myo1b                | myosin IB                                                                                                                         | 0.000535424  | 0.30921     | 0.3184134   | 1.811793991  |
| 1427450_x_at | Myo1b                | myosin IB                                                                                                                         | 0.00054444   | 0.07649313  | 0.3184134   | 1.514965066  |
| 1454818_at   | GMB2B                | GLUCOCORTICOID MODULATORY ELEMENT BINDING PROTEIN 2                                                                               | 0.000557182  | 0.9529894   | 0.3157971   | 1.247374057  |
| 1437375_at   | 1429591              | 0 day neonatal thymus cDNA, RIKEN full-length cDNA library, clone A30010E21 product-unclassified, full insert sequence            | 0.00055808   | 0.3820729   | 0.615714    | 0.802729749  |
| 1429591_at   | TACC1                | TRANSFERRIN, ACIDIC COILED-COIL CONTAINING PROTEIN 1                                                                              | 0.000572051  | 8.16425E-05 | 0.7377905   | 1.29900573   |
| 1445297_at   | ---                  | ---                                                                                                                               | 0.000575949  | 0.1113447   | 0.1891607   | 1.224837951  |
| 1458010_at   | ---                  | ---                                                                                                                               | 0.000576339  | 0.603577188 | 0.3756734   | 1.544224137  |
| 1456722_at   | Chd1l                | chordin-like 1                                                                                                                    | 0.000587863  | 0.7627504   | 0.5689023   | 1.844246463  |
| 1437247_at   | FOSL2                | FOS-LIKE ANTIGEN 2                                                                                                                | 0.000587934  | 0.5597199   | 0.4454171   | 1.798587386  |
| 1438382_at   | Apod4l               | adenomatous polyposis coli down-regulated 1                                                                                       | 0.00058983   | 0.6193384   | 0.6029865   | 0.7151574555 |
| 1418310_at   | Ch1c1                | cholecystokinin releasing hormone receptor 1                                                                                      | 0.00059948   | 0.6500034   | 0.4078906   | 1.571115114  |
| 1441610_at   | N28178               | expressed sequence N28178                                                                                                         | 0.000595041  | 0.7968254   | 0.7866748   | 1.218206338  |
| 142174_x_at  | Tspn18               | tetraspanin 18                                                                                                                    | 0.00059779   | 0.1446278   | 0.3534409   | 0.862158994  |
| 1417676_at   | Rarb2                | retinoblastoma tyrosine phosphatase, receptor type, O                                                                             | 0.000609238  | 0.000514671 | 0.5886915   | 1.281444177  |
| 1429123_at   | RAB27A               | RAB27A, MEMBER RAS ONCOGENE FAMILY                                                                                                | 0.000602793  | 0.7988219   | 0.728725    | 0.630781819  |
| 1444492_at   | PTPRD                | PROTEIN TYROSINE PHOSPHATASE, RECEPTOR TYPE, D                                                                                    | 0.000606742  | 0.04267448  | 0.1569284   | 1.56922739   |
| 1448929_at   | Myo1b                | myosin IB                                                                                                                         | 0.000614678  | 0.02372215  | 0.1589023   | 0.91261497   |
| 1426972_at   | SEC24D               | SEC24 RELATED GENE FAMILY, MEMBER D (S. CEREVISIAE)                                                                               | 0.00061969   | 0.0882915   | 0.0810835   | 0.658666594  |
| 1439130_at   | BC052046             | cDNA sequence BC052046                                                                                                            | 0.000625838  | 0.0345614   | 0.2902352   | 0.657992563  |
| 1435276_at   | A330211H01R1K        | RIKEN cDNA A330211H01                                                                                                             | 0.00062586   | 0.154908    | 0.3190482   | 1.740404103  |
| 1417300_at   | SMPD3.3B             | SPHINGOMYELIN PHOSPHODIESTERASE, ACID-LIKE 3B                                                                                     | 0.00062848   | 0.7741984   | 0.7602493   | 0.531146654  |
| 1402317_at   | CLDN22               | CLAUDIN 22                                                                                                                        | 0.000638248  | 0.5325018   | 0.9598387   | 0.662004293  |
| 1450712_at   | Kcnp9                | potassium inwardly-rectifying channel, subfamily J, member 9                                                                      | 0.000645581  | 0.31646965  | 0.15466437  | 1.51466437   |
| 1429982_at   | 4933426K21R1K        | RIKEN cDNA 4933426K21                                                                                                             | 0.000647113  | 0.05212072  | 0.86106     | 0.659822201  |
| 1439170_at   | E3300619R1K          | RIKEN cDNA E3300619                                                                                                               | 0.000646573  | 0.2148221   | 0.1961828   | 1.3721187    |
| 1452110_at   | AT8R                 | TRIS(1,4)ETHYLENEBIS(2-AMINOETHYL)HOMOCYSTEINE METHYLTRANSFERASE REDUCTASE                                                        | 0.000646573  | 0.01681263  | 0.147698967 | 1.476709895  |
| 1460353_at   | TMEM48               | TRANSMEMBRANE PROTEIN 48                                                                                                          | 0.000661049  | 0.00977746  | 0.752787    | 0.78031516   |
| 201002040R1K | RIKEN cDNA 201002040 | RIKEN cDNA 201002040 GENE                                                                                                         | 0.000667145  | 0.9393164   | 0.1547886   | 0.788381582  |
| 1449048_at   | RANBP5               | RAS ASSOCIATION (B) DOMAIN (RAF-6) DOMAIN FAMILY 5                                                                                | 0.000681456  | 0.16623766  | 0.648039856 | 0.658039856  |
| 1426083_x_at | Rgi1                 | B-cell translocation gene 1, anti-proliferative                                                                                   | 0.00072815   | 0.4067262   | 0.2059762   | 0.618457638  |
| 1426167_at   | Camk4                | calcium/calmodulin-dependent protein kinase IV                                                                                    | 0.000720995  | 0.03167661  | 0.1627457   | 1.354461238  |
| 1452363_at   | MAK10                | MAK10 HOMOLOG, AMINO-ACID N-ACETYLTRANSFERASE SUBUNIT, (S. CEREVISIAE)                                                            | 0.000747576  | 0.00080344  | 0.1379038   | 1.146545558  |
| 1418743_x_at | Tesc                 | teskalin                                                                                                                          | 0.000762746  | 0.5381729   | 0.2028326   | 1.412664931  |
| 1441608_at   | ---                  | ---                                                                                                                               | 0.000770032  | 0.1580723   | 0.0796021   | 1.36697908   |
| 1458177_at   | EBPL                 | EMPOPHILIN BINDING PROTEIN-LIKE                                                                                                   | 0.000771717  | 0.3252991   | 0.1033491   | 0.626284032  |
| 1459602_at   | CN11                 | CYCLIN 11                                                                                                                         | 0.000778714  | 0.237446    | 0.09997429  | 1.36389945   |
| 1446332_at   | Pcdhgc3              | Protocadherin gamma subfamily C, 3                                                                                                | 0.000779902  | 0.210633    | 0.2295728   | 1.554208568  |
| 1456397_at   | Cdh4                 | cadherin 4                                                                                                                        | 0.000800952  | 0.8647289   | 0.3462504   | 0.7114149    |
| 1459020_at   | CACNG3               | CALCIUM CHANNEL, VOLTAGE-DEPENDENT, GAMMA SUBUNIT 3                                                                               | 0.000803362  | 0.01417108  | 0.0779062   | 1.258001475  |
| 1444338_at   | ---                  | ---                                                                                                                               | 0.000848265  | 0.002769319 | 0.1686604   | 1.865171001  |
| 1438138_x_at | SLC25A29             | SOLUTE CARRIER FAMILY 25 (MITOCHONDRIAL CARRIER, PALMITOYL-CARNITINE TRANSPORTER), MEMBER 29                                      | 0.00085135   | 7.34486E-06 | 0.9966446   | 0.842992748  |
| 1427870_at   | Glc1c1               | glucocorticoid induced transcript 1                                                                                               | 0.000864449  | 0.8996362   | 0.063638    | 0.620638     |
| 1426218_at   | Glc1c1               | glucocorticoid induced transcript 1                                                                                               | 0.000868661  | 0.6055454   | 0.2295962   | 1.411001585  |
| 1439358_at   | Pip2                 | Phosphatidylinositol 2                                                                                                            | 0.000880943  | 0.00302325  | 0.1706165   | 0.688100209  |
| 1444835_at   | BC030409             | CINA SEQUENCE BINDING PROTEIN 8                                                                                                   | 0.000884683  | 0.4336973   | 0.531121    | 1.224052352  |
| 1417215_at   | RAB27B               | RAB27B, MEMBER RAS ONCOGENE FAMILY                                                                                                | 0.000886661  | 0.8083673   | 0.8953132   | 0.688614762  |
| 1439748_at   | ABC2D                | ATP-BINDING CASSETTE, SUB-FAMILY D (ALD), MEMBER 2                                                                                | 0.000909902  | 0.01275477  | 0.3348173   | 1.247978557  |
| 1422825_at   | CART                 | COCaine AND AMPHETAMINE REGULATED TRANSCRIPT                                                                                      | 0.000911957  | 0.1099084   | 0.1845212   | 0.920851321  |
| 1444956_at   | ---                  | ---                                                                                                                               | 0.000924746  | 0.9072413   | 0.3961552   | 0.738422586  |
| 1441693_at   | ADAMTS3              | ADAM METALLOPROTEINASE WITH THROMBOSPONDIN TYPE 1 MOTIF 3                                                                         | 0.00097849   | 0.00316611  | 0.4835131   | 0.71604599   |
| 1447807_at   | Aphap2b              | Aphap2b like (A4) domain containing protein-binding, family A, member 1 binding protein                                           | 0.00098392   | 0.1488984   | 0.1892245   | 0.832934625  |
| 1453211_at   | FNDC1                | FIBRONECTIN TYPE III DOMAIN CONTAINING 1                                                                                          | 0.000985838  | 0.4910492   | 0.2392053   | 0.683814124  |
| 1460619_at   | 4931419K03R1K        | RIKEN cDNA 4931419K03                                                                                                             | 0.000996462  | 0.62524239  | 0.9171043   | 0.752370651  |
| 1444633_at   | ---                  | ---                                                                                                                               | 0.001019597  | 0.7379793   | 0.1945432   | 1.544224137  |
| 1456200_at   | LNORF3               | LON PEPTIDASE N-TERMINAL DOMAIN AND RING FINGER 3                                                                                 | 0.001031352  | 0.9121484   | 0.8039901   | 0.79396473   |
| 1446802_at   | ---                  | ---                                                                                                                               | 0.001031493  | 0.01498977  | 0.08872428  | 1.212302926  |
| 1433558_at   | DAB2IP               | DISABLED HOMOLOG 2 (DROSOPHILA) INTERACTING PROTEIN                                                                               | 0.001033356  | 5.49321E-06 | 0.4431257   | 1.344244928  |
| 1449205_at   | OYV2L2               | RIKEN cDNA 1809107D21 GENE                                                                                                        | 0.001048296  | 0.003816281 | 0.0663176   | 1.468091901  |
| 1427049_at   | SMO                  | SMOOTH ENDED HOMOLOG (DROSOPHILA)                                                                                                 | 0.001050125  | 0.533677    | 0.9547994   | 0.747461136  |
| 1416623_at   | THBS3                | THROMBOSPONDIN 3                                                                                                                  | 0.001055748  | 5.54418E-07 | 0.1487456   | 0.608509771  |
| 1429916_at   | PFP40A</             |                                                                                                                                   |              |             |             |              |

|              |                |                                                                                     |             |             |             |             |
|--------------|----------------|-------------------------------------------------------------------------------------|-------------|-------------|-------------|-------------|
| 143782_at    | Acv2a          | Activin receptor 1A                                                                 | 0.001679687 | 0.04003979  | 0.73557     | 0.66644821  |
| 143783_at    | Kcch1          | potassium voltage gated channel, Shal-related subfamily, member 1                   | 0.00175528  | 0.494451    | 0.448177    | 1.377454151 |
| 1447493_at   | AS30088108R1K  | RIKEN cDNA AS30088108 GENE                                                          | 0.001739215 | 0.116369    | 0.559078    | 0.671127354 |
| 1437306_at   | C130092011R1K  | RIKEN cDNA C130092011 GENE                                                          | 0.001746823 | 0.9943533   | 0.06938976  | 1.37200521  |
| 1453236_at   | Pfna2          | pflin2                                                                              | 0.001751353 | 0.1140773   | 0.2992017   | 1.24545397  |
| 1429906_at   | AY900351E12R1K | RIKEN cDNA AY900351E12 GENE                                                         | 0.001783319 | 8.27359E-05 | 0.176933    | 1.469990979 |
| 1433699_at   | TNFAP3         | TUMOR NECROSIS FACTOR, ALPHA-INDEUCIBLE PROTEIN 3                                   | 0.00182239  | 0.408289    | 0.6129667   | 0.764642987 |
| 1439073_at   | ZPPI60         | RIKEN cDNA ZP6480D16 GENE                                                           | 0.001825262 | 0.6024086   | 0.329893    | 1.335043577 |
| 1457496_at   | ---            | ---                                                                                 | 0.001825464 | 0.005051657 | 0.1282663   | 1.581004519 |
| 1433792_at   | Nrip2          | nuclear receptor interacting protein 2                                              | 0.001831938 | 0.8315431   | 0.5822663   | 0.678171351 |
| 1436011_at   | ELMO2          | RIKEN cDNA F19000224 GENE                                                           | 0.001849156 | 0.1386772   | 0.7880814   | 0.715474386 |
| 1437339_at   | Pc45           | progesterone corepressor subunit kcn type 5                                         | 0.001852366 | 0.9748423   | 0.243955    | 0.510970972 |
| 1442603_at   | P61            | Polybromo 1                                                                         | 0.001862726 | 0.9587058   | 0.9589642   | 0.710964739 |
| 1444305_at   | LOC381400      | SIMILAR TO MYH7B PROTEIN                                                            | 0.001866114 | 0.9390687   | 0.6052182   | 1.497084659 |
| 143015608R1K | 931015608R1K   | progesterone corepressor subunit kcn type 5                                         | 0.001880347 | 0.2898359   | 0.649577    | 1.817495972 |
| 1427416_x_at | LOC674944      | similar to dual specificity phosphatase 7                                           | 0.001886665 | 0.2378063   | 0.4529707   | 1.381492971 |
| 1447399_at   | LTK            | LEUKOCYTE TYROSINE KINASE                                                           | 0.001904364 | 0.0358879   | 0.09104937  | 1.259478148 |
| 1437199_at   | Ccnd1          | cyclin D1                                                                           | 0.001923435 | 0.9184858   | 0.501764    | 1.389226218 |
| 1433716_x_at | Gfra2          | glial cell line derived neurotrophic factor family receptor alpha 2                 | 0.00194143  | 0.6441185   | 0.9761226   | 0.589642247 |
| 1441730_at   | TMC1           | HYPOPHYSEAL PROTEIN LOC212904                                                       | 0.001947073 | 0.008094833 | 0.3070752   | 1.324933469 |
| 1449552_at   | DHDWG0951E     | DNA SEGMENT, CHR 4, BIRG1A4 & WOMEN'S GENETICS 0951 EXPRESSED                       | 0.001969892 | 0.3433088   | 0.6623628   | 0.665619834 |
| 1425688_at   | SCN1A          | SODIUM CHANNEL, NONVOLTAGE-GATED, TYPE 1, ALPHA                                     | 0.001982165 | 0.001043262 | 0.3088074   | 0.665908904 |
| 1455250_at   | Sb3hp4         | Sb3-domain binding protein 4                                                        | 0.001987874 | 3.002513    | 0.118991    | 1.251138571 |
| 1451421_x_at | FKBP5          | FKBP51                                                                              | 0.001991383 | 0.00335685  | 0.3075704   | 0.723821092 |
| 1423395_at   | Tmx3           | translin-associated factor X                                                        | 0.001997468 | 0.01499031  | 0.1661533   | 1.311403876 |
| 1433893_x_at | Spag5          | sperm associated antigen 5                                                          | 0.002003174 | 0.4575088   | 0.5020399   | 1.451442549 |
| 1428946_at   | UBE1L2         | UBQUITIN-ACTIVATING ENZYME E1-LIKE 2                                                | 0.002008689 | 0.06547071  | 0.948077    | 1.35920604  |
| 1440765_at   | Fra1           | Fraser syndrome 1 homolog (human)                                                   | 0.002044737 | 0.7797992   | 0.4975831   | 1.963584532 |
| 1429125_at   | Mgk11          | mitogen-activated protein kinase 11                                                 | 0.002088871 | 0.2244072   | 0.7796736   | 1.431623477 |
| 1457196_at   | Nipi           | neurapilin                                                                          | 0.002097462 | 0.001245739 | 0.065248279 | 0.789036062 |
| 1426611_at   | PRKACB         | PROTEIN KINASE, CAMP DEPENDENT, CATALYTIC, BETA                                     | 0.002115789 | 0.1391557   | 0.2325005   | 1.11996859  |
| 1424341_x_at | PCFHA9         | PROTOPACHIERIN ALPHA 9                                                              | 0.002122168 | 0.3835737   | 0.1656558   | 0.9093538   |
| 1453554_at   | C230878M08R1K  | RIKEN cDNA C230878M08R1K GENE                                                       | 0.002126732 | 0.02216122  | 0.2023162   | 0.78905725  |
| 1426098_at   | Galnt7         | UDP-N-acetyl-alpha-D-galactosamine: polypeptide N-acetylgalactosaminyltransferase 7 | 0.002142316 | 0.4654404   | 0.4462413   | 1.13248362  |
| 1432228_at   | 4933406B15R1K  | RIKEN cDNA 4933406B15 GENE                                                          | 0.002185774 | 0.2533959   | 0.4701839   | 0.57561987  |
| 1401847_at   | ARG2           | ARGINASE, TYPE II                                                                   | 0.002199091 | 0.3186883   | 0.164491    | 0.602254994 |
| 1440721_at   | 9304031N17R1K  | RIKEN cDNA 9304031N17 GENE                                                          | 0.002200888 | 0.1858383   | 0.3681731   | 1.475232608 |
| 1426797_at   | Z700094F01R1K  | RIKEN cDNA Z700094F01 GENE                                                          | 0.002212024 | 0.9275622   | 0.6104745   | 0.800664296 |
| 1494236_x_at | CCL21C         | CHEMOKINE (C-C MOTIF) LIGAND 21A                                                    | 0.002212423 | 0.00469359  | 0.06686577  | 1.257463178 |
| 1456759_at   | LRRC4C         | LEUCINE RICH REPEAT CONTAINING 4C                                                   | 0.00221461  | 0.4091444   | 0.4013162   | 0.60341595  |
| 1448686_at   | Ifi16          | interferon 16                                                                       | 0.002226614 | 0.4718047   | 0.6928443   | 0.616264149 |
| 1440455_at   | AB48899        | EXPRESSED SEQUENCE AB48899                                                          | 0.002247425 | 0.7609111   | 0.5163439   | 1.254294094 |
| 1450842_at   | CENPA          | CENTROMERE AUTOANTIGEN A                                                            | 0.002254832 | 0.09196765  | 0.4930178   | 1.579245138 |
| 1445118_at   | ---            | ---                                                                                 | 0.002279182 | 0.790276    | 0.5984705   | 0.32736631  |
| 1457137_at   | ---            | ---                                                                                 | 0.002282962 | 0.8011371   | 0.2632338   | 1.380720997 |
| 1428909_at   | ---            | ---                                                                                 | 0.002286537 | 0.0280853   | 0.3081734   | 1.808641244 |
| 1427975_at   | ---            | ---                                                                                 | 0.002315581 | 0.0134933   | 0.9859467   | 0.710429032 |
| 1424310_at   | MOC52          | MOULDBLENDED COFACTOR SYNTHESIS 2                                                   | 0.002326232 | 0.0908444   | 0.3114025   | 0.827162368 |
| 1435559_at   | Adh3p15        | ADH3 (GTPase activating protein) 5                                                  | 0.002325882 | 0.06734582  | 0.468870713 | 0.5552227   |
| 1430407_at   | 3110035C09R1K  | RIKEN cDNA 3110035C09 GENE                                                          | 0.002362953 | 0.2779883   | 0.5129998   | 1.590698228 |
| 1427242_at   | KLF6           | KRUPPEL-LIKE FACTOR 6                                                               | 0.002371487 | 0.002319291 | 0.52528169  | 1.1868683   |
| 1438611_at   | TUBA7          | TUBULIN, ALPHA 3                                                                    | 0.002374251 | 0.4640408   | 0.4098162   | 1.444895558 |
| 14161818_at  | Parva          | parvin, alpha                                                                       | 0.002381097 | 0.008516735 | 0.2905245   | 1.42062797  |
| 1428006_at   | FGF16          | FIBROBLAST GROWTH FACTOR 16                                                         | 0.002426912 | 0.4261487   | 0.6289859   | 1.403279081 |
| 1420647_at   | Dac2b          | deaf-2b, C2, beta                                                                   | 0.002430234 | 0.1554317   | 0.616310432 | 0.616310432 |
| 1433833_at   | Fad3cb         | fibronectin type III domain containing 3B                                           | 0.002432995 | 0.108788    | 0.1120496   | 1.181289738 |
| 1421991_x_at | Igf8p4         | insulin-like growth factor binding protein 4                                        | 0.002476039 | 0.0656398   | 0.7200266   | 1.356177625 |
| 1426411_at   | STRIP          | SUPERMIMETIC FIBRINOLYTIC RAS BINDING PROTEIN                                       | 0.002479264 | 0.2977965   | 0.1111478   | 1.090304997 |
| 1431098_at   | Ran            | ras (Ras) oncogene cell-expressed intermediate filament-associated protein          | 0.002485466 | 0.0512478   | 0.09270319  | 1.97951387  |
| 1418881_at   | EFCB2          | EF HAND CALCIUM BINDING PROTEIN 2                                                   | 0.002507072 | 0.01494399  | 0.6156661   | 1.408683762 |
| 1448303_at   | GNPMB          | GLYCOPROTEIN (TRANSMEMBRANE) NMB                                                    | 0.002518961 | 0.7179739   | 0.3333386   | 0.628089784 |
| 1429487_at   | 5430455Z22R1K  | RIKEN cDNA 5430455Z22R1K GENE                                                       | 0.002525357 | 0.197255    | 0.6156662   | 1.389283216 |
| 1433758_at   | NISCH1         | IMIDAZOLINE RECEPTOR 1-LIKE PROTEIN                                                 | 0.002529478 | 2.4958E-08  | 0.1152466   | 0.78928748  |
| 1409286_at   | Nng1           | neurin G1                                                                           | 0.002564994 | 0.827615    | 0.1270329   | 1.494316035 |
| 1455868_at   | TUBGCP2        | TUBULIN, GAMMA COMPLEX ASSOCIATED PROTEIN 2                                         | 0.002599971 | 0.00808076  | 0.4613172   | 0.735282693 |
| 1453444_at   | AW49418        | EXPRESSED SEQUENCE AW49418                                                          | 0.002606251 | 0.2321098   | 0.601785    | 0.787928748 |
| 1433577_at   | DAB1           | DISABLED HOMOLOG 1 (DROSOPHILA)                                                     | 0.002610985 | 0.1561446   | 0.5692791   | 1.23809734  |
| 1421896_at   | ELK1           | ELK1, member of ETS oncogene family                                                 | 0.002614348 | 0.2344454   | 0.2031218   | 0.634627217 |
| 1448445_at   | Rage2          | Ras-related GTP binding 2                                                           | 0.002618702 | 0.5133508   | 0.521022    | 1.253485655 |
| 1440555_at   | 6631427C17R1K  | RIKEN cDNA 6631427C17R1K GENE                                                       | 0.002623665 | 0.00492608  | 0.2931255   | 1.2767023   |
| 1420340_at   | 4930413O22R1K  | RIKEN cDNA 4930413O22 GENE                                                          | 0.002627497 | 0.06881979  | 0.686081    | 0.834567836 |
| 1422552_at   | RPRM           | RPRM10, TP53 DEPENDENT G2 ARREST MEDIATOR CANDIDATE                                 | 0.002742006 | 0.1872118   | 0.3135224   | 0.741515193 |
| 1434909_at   | LYCAT          | LYSINE CARDIOLIPIN ACYLTRANSFERASE                                                  | 0.002748119 | 0.3716402   | 0.9187874   | 1.12231407  |
| 1421821_at   | LDLR           | LOW DENSITY LIPOPROTEIN RECEPTOR                                                    | 0.002770765 | 0.4789911   | 0.206769    | 1.19833807  |
| 1427685_x_at | Synj2          | synaptojanin 2                                                                      | 0.002791243 | 0.03214055  | 0.3202033   | 1.341507722 |
| 1456129_at   | R308033G06R1K  | RIKEN cDNA R308033G06R1K GENE                                                       | 0.002802832 | 0.977968    | 0.6134845   | 0.392913766 |
| 1425934_at   | BG4L14         | UDP-GAL-BETA-GALACTOSYL BETA 1-4-GALACTOSYLTRANSFERASE, POLYPEPTIDE 4               | 0.002803544 | 0.00356542  | 0.5732844   | 0.72824747  |
| 1451964_at   | MA2            | MELANOMA INHIBITOR ACTIVITY 2                                                       | 0.002819707 | 0.2799629   | 0.2331639   | 2.301042477 |
| 1425052_at   | ---            | ---                                                                                 | 0.002819952 | 0.28671029  | 0.6295714   | 0.710363182 |
| 1441018_at   | USP24          | UBQUITIN SPECIFIC PROTEINASE 24                                                     | 0.00284575  | 0.3471024   | 0.7409226   | 1.35198367  |
| 1438523_x_at | 1500001A10R1K  | RIKEN cDNA 1500001A10 GENE                                                          | 0.002858532 | 0.2099917   | 0.7998469   | 0.47679978  |
| 1428396_at   | Pdgfra5        | UDP-GAL-4-epimerase 5                                                               | 0.002872781 | 0.05283085  | 0.6395714   | 0.784302137 |
| 1430703_at   | LOC546515      | SIMILAR TO KERATIN ASSOCIATED PROTEIN 9-1                                           | 0.002898796 | 0.210209    | 0.09418322  | 0.28518005  |
| 1427401_at   | Chrna5         | cholinergic receptor, nicotinic, alpha polypeptide 5                                | 0.002899101 | 0.1387745   | 0.822963    | 0.66686132  |
| 1491722_at   | KLK8           | PROTEASE, SERINE, 19 (NEUROPSIN)                                                    | 0.002910979 | 0.01643689  | 0.7605146   | 1.403909389 |
| 1419592_at   | UNC5C          | UNC-5 HOMOLOG C (C. ELEGANS)                                                        | 0.00291111  | 0.00047912  | 0.896131    | 1.437906213 |
| 1455629_at   | Drd1a          | dopamine receptor 1A                                                                | 0.002914916 | 0.5967964   | 0.078413    | 0.834325514 |
| 1457193_at   | ---            | ---                                                                                 | 0.002920767 | 0.6767904   | 0.229907    | 1.22796873  |
| 1435445_at   | MMD            | MONOCYTE TO MACROPHAGE DIFFERENTIATION-ASSOCIATED                                   | 0.002926645 | 0.1592673   | 0.1986405   | 0.6766195   |
| 1435847_at   | CDC42BP4       | EXPRESSED SEQUENCE A462003                                                          | 0.002944464 | 0.02718867  | 0.3494781   | 1.129914876 |
| 1428991_at   | HRASL5         | HRAS-LIKE SUPPRESSOR                                                                | 0.002970996 | 0.4972422   | 0.5988169   | 0.71079541  |
| 1434852_at   | PLA2G2F        | PHOSPHOLIPASE A2, GROUP IIF                                                         | 0.002984579 | 0.3462078   | 0.3525629   | 1.063467217 |
| 1456242_at   | ---            | ---                                                                                 | 0.00298491  | 0.0588951   | 0.2284971   | 0.362290461 |
| 1448496_x_at | DNG1           | INHIBITOR OF GROWTH FAMILY, MEMBER 1                                                | 0.002998381 | 2.19812E-08 | 0.1218883   | 1.071427468 |
| 1417111_at   | Man1a          | mannosidase 1, alpha                                                                | 0.003004849 | 0.02336604  | 0.7183784   | 1.311586169 |
| 1428535_at   | 9430020K01R1K  | RIKEN cDNA 9430020K01 GENE                                                          | 0.003016259 | 0.1056557   | 0.7043294   | 1.578963887 |
| 1449175_at   | GNR65          | G-PROTEIN COUPLED RECEPTOR 65                                                       | 0.003033385 | 0.7190088   | 0.06420755  | 2.444651606 |
| 1427038_at   | PENK1          | PROENKEPHALIN 1                                                                     | 0.003034664 | 0.22232     | 0.7183784   | 1.688256734 |
| 1427186_x_at | Mez2a          | myocyte enhancer factor 2A                                                          | 0.003037817 | 0.900066    | 0.025638    | 0.812567834 |
| 1438539_at   | R3hdm1         | R3H domain 1 (binds single-stranded nucleic acids)                                  | 0.003040693 | 0.03973051  | 0.9578223   | 1.358878469 |
| 1439715_at   | 150001106R1K   | RIKEN cDNA 150001106R1K GENE                                                        | 0.003042151 | 0.01807443  | 0.5611447   | 0.609510262 |
| 1437857_at   | Dpy193         | dpy-19-like 3 (C. elegans)                                                          | 0.003066528 | 0.2170245   | 0.3233033   | 1.37710879  |
| 1429249_at   | 4833424O15R1K  | RIKEN cDNA 4833424O15 GENE                                                          | 0.003073392 | 5.47808E-05 | 0.3033078   | 1.241136415 |
| 1437654_at   | SST            | SEROTONIN                                                                           | 0.003079157 | 0.015791    | 0.5661447   | 0.609510262 |
| 1448249_at   | Gpdi1          | glycerol-3-phosphate dehydrogenase 1 (soluble)                                      | 0.003077571 | 0.1888997   | 0.7207397   | 1.271984209 |
| 1418790_at   | ZPPI2          | ZINC FINGER PROTEIN 312                                                             | 0.003081384 | 0.1132621   | 0.5299336   | 1.331702517 |
| 1451469_at   | 1250905L17R1K  | RIKEN cDNA 1250905L17R1K GENE                                                       | 0.003084337 | 0.003714741 | 0.06364482  | 0.869484562 |
| 1439647_at   | LOC433698      | HYPOPHYSEAL LOC433698 GENE                                                          | 0.003093695 | 0.4321166   | 0.4323937   | 1.199463685 |
| 1425606_at   | SLC5A8         | SOLUTE CARRIER FAMILY 5 (IODIDE TRANSPORTER), MEMBER 8                              | 0.003099857 | 0.9131834   | 0.7273167   | 2.984182824 |

|              |                         |                                                                                                   |             |             |             |             |
|--------------|-------------------------|---------------------------------------------------------------------------------------------------|-------------|-------------|-------------|-------------|
| 1427196_at   | WNK4                    | WNK LYSINE DEFICIENT PROTEIN KINASE 4                                                             | 0.004001409 | 0.8349315   | 0.711122    | 1.7918384   |
| 1434051_s_at | Hsp90a2                 | heat shock protein 90A class B member 2                                                           | 0.004008756 | 0.5447309   | 0.711122    | 1.21151314  |
| 1425413_t    | Rfx3                    | regulatory factor X, 3 (influences HLA class II expression)                                       | 0.004003118 | 0.3978921   | 0.066258529 | 0.72900018  |
| 1438702_at   | ---                     | ---                                                                                               | 0.004016134 | 0.003167681 | 0.241812    | 1.259830656 |
| 1430996_s_at | D14Etd581e              | ---                                                                                               | 0.00411237  | 0.1855833   | 0.65492279  | 0.718037277 |
| 1429725_at   | STX17                   | SYNTAXIN 17                                                                                       | 0.00411221  | 0.2895206   | 0.4639702   | 0.72667522  |
| 1428384_at   | D4Bdg9951e              | ---                                                                                               | 0.004116906 | 0.0584922   | 0.8342578   | 0.67038683  |
| 1447025_at   | UBE2E2                  | UBQUITIN-CONJUGATING ENZYME E2E 2 (UBC45 HOMOLOG, YEAST)                                          | 0.004120787 | 0.05453038  | 0.5151224   | 1.31588881  |
| 1458620_at   | LOC312993               | SIMILAR TO UBQUITIN-A5 RESIDUE RIBOSOMAL PROTEIN FUSION PROTEIN                                   | 0.004128331 | 0.5620697   | 0.5876269   | 0.33442906  |
| 1419638_t    | Efnb2                   | efrin B2                                                                                          | 0.004133247 | 0.3182625   | 0.50295     | 1.34366053  |
| 1457528_at   | Slc6a7                  | solute carrier family 6, sodium bicarbonate cotransporter, member 7                               | 0.00417394  | 0.00026293  | 0.7067562   | 0.61777437  |
| 1426115_s_at | Keap1                   | potassium inwardly-rectifying channel, subfamily 1, member 9                                      | 0.004178037 | 0.8012154   | 0.829082    | 1.759440715 |
| 1457505_s_at | ABC8                    | ATP-BINDING CASSETTE, SUB-FAMILY C (CFTRMRP), MEMBER 8                                            | 0.004208127 | 0.00638697  | 0.5138617   | 0.676975609 |
| 1424095_at   | Ax33                    | additional sex combs like 3 (Drosophila)                                                          | 0.004229411 | 0.2684004   | 0.0780893   | 1.1921268   |
| 1424237_at   | ---                     | ---                                                                                               | 0.004252799 | 0.62464109  | 0.39837     | 0.838500676 |
| 1422540_at   | FBLN1                   | FIBULIN 1                                                                                         | 0.004289857 | 0.003829405 | 0.8851269   | 0.614152771 |
| 1427177_at   | Ftyc1                   | FYVE and coiled-coil domain containing 1                                                          | 0.004294494 | 0.9952577   | 0.4433076   | 0.79914202  |
| 1434153_at   | SHB                     | SRC HOMOLOGY 2 DOMAIN-CONTAINING TRANSFORMING PROTEIN                                             | 0.004302764 | 0.8580033   | 0.90638     | 1.48578369  |
| 1452161_at   | TIPARP                  | TCDD-INDUCIBLE POLY(ADP-RIBOSE) POLYMERASE                                                        | 0.004307401 | 0.006390009 | 0.1978319   | 1.206061258 |
| 1431496_at   | LOC3104F01R1K           | RIKEN CDNA B23014F01 GENE                                                                         | 0.004326662 | 0.1001636   | 0.0847249   | 0.507065888 |
| 1427728_at   | CHRN3                   | CHOLINEERGIC RECEPTOR, NICOTINIC, GAMMA POLYPEPTIDE                                               | 0.004348294 | 0.6161636   | 0.1102239   | 2.79378562  |
| 1453800_at   | 9130022K13R1K           | RIKEN CDNA 9130022K13 GENE                                                                        | 0.004361579 | 0.9265856   | 0.6326760   | 0.260075283 |
| 1451871_s_at | GHR                     | GROWTH HORMONE RECEPTOR                                                                           | 0.004394831 | 0.0131566   | 0.8143499   | 1.56447954  |
| 1452524_at   | Lrrn6l                  | leucine rich repeat transmembrane neuronal 1                                                      | 0.004410201 | 1.7536849   | 0.0985806   | 0.758830796 |
| 1422088_t    | Mylc1                   | v-myc myelocytomatous viral oncogene homolog 1, lung carcinoma derived (avian)                    | 0.00442022  | 0.02137007  | 0.1554219   | 0.644792514 |
| 1446237_at   | Akap9                   | A kinase (PRK) anchor protein (yt9a9)                                                             | 0.004436014 | 0.946461    | 0.305646    | 0.76726905  |
| 1456769_at   | PSMA4                   | PROTEASOME (PROSOM, MACROPAIN) SUBUNIT, ALPHA TYPE 1                                              | 0.004445471 | 0.9747684   | 0.8292038   | 0.539337173 |
| 1427665_s_at | NFIC                    | NUCLEAR FACTOR 1C                                                                                 | 0.00445666  | 0.6058722   | 0.4727632   | 0.913454325 |
| 1422221_at   | HAND2                   | HEART AND NEURAL CREST DERIVATIVES EXPRESSED TRANSCRIPT 2                                         | 0.004471885 | 0.4005059   | 0.3870322   | 2.452813166 |
| 1454763_at   | ANKRD17                 | ANKYRIN REPEAT DOMAIN-CONTAINING PROTEIN 17                                                       | 0.004485994 | 0.0332724   | 0.5640821   | 1.138344643 |
| 1456532_at   | GNB5                    | GUANINE NUCLEOTIDE BINDING PROTEIN, BETA 5                                                        | 0.004541135 | 0.529984    | 0.3452762   | 1.440083954 |
| 1418995_at   | ---                     | ---                                                                                               | 0.004550313 | 0.423604    | 0.591077    | 0.690217887 |
| 1456759_at   | PSME4                   | PROTEASOME (PROSOM, MACROPAIN) ACTIVATOR, SUBUNIT 4                                               | 0.004591058 | 0.2213532   | 0.0642952   | 0.642392818 |
| 1426383_at   | CRY2                    | CRYPTOCHROME 2 (PHOTOLYASE-LIKE)                                                                  | 0.004598424 | 0.477643    | 0.6846672   | 1.181726829 |
| 1434431_s_at | ADORA2B                 | ADENOSINE A2B RECEPTOR                                                                            | 0.004598378 | 0.2416206   | 0.2585774   | 0.719331205 |
| 1444169_at   | 3110952M02R1K           | RIKEN CDNA 3110952M02 GENE                                                                        | 0.00460571  | 0.2614884   | 0.6879995   | 1.46491081  |
| 1453777_s_at | RNF13                   | RIKEN CDNA 4921310F01 GENE                                                                        | 0.004636019 | 0.8797167   | 0.828912    | 0.93119546  |
| 1446673_t    | YAF2                    | YY1 ASSOCIATED FACTOR 2                                                                           | 0.004638485 | 0.00023877  | 0.05706189  | 0.520415832 |
| 1454529_at   | 4930518C04R1K           | RIKEN CDNA 4930518C04 GENE                                                                        | 0.004647408 | 0.7702303   | 0.0582453   | 2.17661075  |
| 1449491_at   | CARD10                  | CASPASE RECRUITMENT DOMAIN FAMILY, MEMBER 10                                                      | 0.004759033 | 0.0911053   | 0.8800194   | 1.26641817  |
| 1428372_t    | ST5                     | SUPPRESSION OF TUMORIGENICITY 5                                                                   | 0.00475725  | 0.2115799   | 0.3450327   | 0.732028375 |
| 1446255_at   | KCNQ1                   | POTASSIUM VOLTAGE-GATED CHANNEL, SUBFAMILY Q, MEMBER 1                                            | 0.004767956 | 0.1744414   | 0.1700572   | 1.55910764  |
| 142474_s_at  | Camk2                   | calcium/calmodulin-dependent protein kinase kinase 2, beta                                        | 0.004791302 | 0.2903213   | 0.943021    | 0.802399096 |
| 1438213_t    | AKS0018L16R1K           | RIKEN CDNA AKS0018L16 GENE                                                                        | 0.004842968 | 0.3216865   | 0.9343686   | 0.776900923 |
| 1440506_at   | SLC7A2                  | SOLUTE CARRIER FAMILY 7 (CATIONIC AMINO ACID TRANSPORTER, Y+ SYSTEM), MEMBER 2                    | 0.004861527 | 0.9779995   | 0.0618137   | 0.63411475  |
| 1458151_at   | KLHL2                   | KELCH LIKE 2, MAYVAIN (DROSOPHILA)                                                                | 0.004877338 | 0.974768    | 0.146605    | 0.81746038  |
| 1440325_at   | SMARCA2                 | SWI/SNF RELATED, MATRIX ASSOCIATED, ACTIN DEPENDENT REGULATOR OF CHROMATIN, SUBFAMILY A, MEMBER 2 | 0.00487402  | 0.7602567   | 0.2990749   | 1.20742377  |
| 1430316_at   | 493079E17R1K            | RIKEN CDNA 493079E17 GENE                                                                         | 0.004904702 | 0.7175509   | 0.81413     | 0.823574224 |
| 1456395_at   | hred1                   | head end containing 1                                                                             | 0.004906279 | 4.12076e-05 | 0.74421     | 1.39654448  |
| 1456596_at   | 643050I02R1K            | EXPRESSED SEQUENCE AW260253                                                                       | 0.00498224  | 0.000524296 | 0.0654959   | 0.669684143 |
| 1431864_at   | FBOXD2                  | F-BOX ONLY PROTEIN 24                                                                             | 0.004989122 | 0.2058865   | 0.00715273  | 0.505066723 |
| 1439041_at   | SLC39A10                | SOLUTE CARRIER FAMILY 39 (ZINC TRANSPORTER), MEMBER 10                                            | 0.004989758 | 0.00031511  | 0.117292049 | 0.891292949 |
| 1437082_at   | Akap9                   | A kinase (PRK) anchor protein (yt9a9)                                                             | 0.005023017 | 0.01305182  | 0.3498189   | 1.176781125 |
| 1439754_t    | SOX12                   | SOX-BOX CONTAINING GENE 12                                                                        | 0.005028449 | 0.0566366   | 0.0624533   | 0.633399964 |
| 1418392_at   | GRP4                    | GLYCYLATE NUCLEOTIDE BINDING PROTEIN 4                                                            | 0.005066811 | 0.1739975   | 0.1378226   | 0.618460662 |
| 1421530_s_at | GRM8                    | GLUTAMATE RECEPTOR, METABOTROPIC 8                                                                | 0.005067801 | 0.7561452   | 0.3537733   | 1.42341819  |
| 1424241_at   | KALRN                   | RIKEN CDNA 2210407G14 GENE                                                                        | 0.00506974  | 0.0013261   | 0.905579    | 1.464349001 |
| 1427600_at   | MMPK3                   | PROTEIN KINASE, MITOGEN ACTIVATED KINASE 3                                                        | 0.005070022 | 0.0602224   | 0.4577927   | 0.615834447 |
| 1431014_t    | C12C2                   | CAT EYE SYNDROME CHROMOSOME REGION, CANDIDATE 2 HOMOLOG (HUMAN)                                   | 0.005080106 | 0.3244484   | 0.4466205   | 0.692287123 |
| 1444683_at   | ---                     | ---                                                                                               | 0.00510448  | 0.3462227   | 0.0960744   | 0.62105327  |
| 1425248_s_at | Tyros3                  | TYRO3 protein tyrosine kinase 3                                                                   | 0.005107816 | 0.2896242   | 0.926668    | 1.398709867 |
| 1427212_at   | ---                     | Transcribed locus                                                                                 | 0.00512598  | 0.2735117   | 0.146605    | 0.480738825 |
| 1427738_at   | DDK12                   | DNA SEGMENT, KIST 2                                                                               | 0.005151203 | 0.5414169   | 0.0595922   | 0.48459386  |
| 1416305_at   | SKS2BP                  | SH3-DOMAIN BINDING PROTEIN 4                                                                      | 0.005162017 | 0.730101    | 0.0962075   | 1.345125414 |
| 1448546_at   | Rasaf1                  | RAS-ASSOCIATION (RABGAP1-6) DOMAIN FAMILY 3                                                       | 0.005164649 | 0.5571273   | 0.2042128   | 0.732198554 |
| 1421488_at   | Rabgap11                | RAB GTPASE INTERACTING PROTEIN 1-LIKE                                                             | 0.005186091 | 0.00020249  | 0.345198    | 0.76256487  |
| 1441024_at   | STIM2                   | FASL SIGNALING MOLECULE 2                                                                         | 0.00518752  | 0.0584426   | 0.5717998   | 0.651167366 |
| 1450139_at   | Rd11b                   | R-cell leukemia lymphoma 11B                                                                      | 0.005200022 | 0.060823295 | 0.4780794   | 0.645814017 |
| 1447952_at   | AUH                     | AU RNA BINDING PROTEIN/ENOYL-COENZYME A HYDRATASE                                                 | 0.005202039 | 0.4213596   | 0.0962197   | 1.327525266 |
| 1442119_at   | AI449212                | EXPRESSED SEQUENCE AI449212                                                                       | 0.005248949 | 0.6504306   | 0.369954    | 0.77668418  |
| 1458499_at   | Pde1a                   | phosphodiesterase 10A                                                                             | 0.005252192 | 0.6263479   | 0.4180227   | 0.8180227   |
| 1440113_at   | MTA1                    | METASTASIS ASSOCIATED 1                                                                           | 0.005258732 | 0.02008804  | 0.2159561   | 0.463634852 |
| 1442050_at   | Zfp608 // D430007A19R1K | zinc finger protein 608 // RIKEN cDNA D430007A19 gene                                             | 0.005280892 | 1.0440311   | 0.1240171   | 1.207742962 |
| 1458582_at   | ZHWI1C15                | ZINC FINGER, DREAM DOMAIN CONTAINING 15                                                           | 0.005286444 | 0.00442568  | 0.707145143 | 0.61581143  |
| 1421834_at   | Pgk5l1a                 | phosphatidylinositol-4-phosphate 5-kinase, type 1 alpha                                           | 0.005312821 | 0.005251164 | 0.5773443   | 0.807114576 |
| 1440990_at   | BC096349                | CDNA SEQUENCE BC096349                                                                            | 0.005333486 | 0.1786648   | 0.4499974   | 0.787815256 |
| 1440613_at   | PERL1D                  | PERL-LIKE DOMAIN CONTAINING 1                                                                     | 0.005335633 | 0.3730538   | 0.408429    | 0.243635448 |
| 1454549_at   | 4930480R2K1K            | RIKEN CDNA 4930480R2K GENE                                                                        | 0.00535704  | 0.0871007   | 0.0781479   | 2.86312803  |
| 1424674_at   | ---                     | ---                                                                                               | 0.005394734 | 0.4060016   | 0.06789738  | 0.68507183  |
| 1417310_s_at | PACSIN2                 | PROTEIN KINASE C AND CASEIN KINASE SUBSTRATE IN NEURONS 2                                         | 0.005399887 | 0.5604695   | 0.666902457 | 0.669024757 |
| 1419754_at   | ---                     | Transcribed locus                                                                                 | 0.005405149 | 0.0992376   | 0.2136229   | 0.42382522  |
| 1418271_t    | BHLHB5                  | BASIC HELIX-LOOP-HELIX DOMAIN CONTAINING, CLASS B5                                                | 0.005413308 | 0.1149079   | 0.4466327   | 0.661742066 |
| 1457287_at   | IRF6                    | INTERFERON REGULATORY FACTOR 6                                                                    | 0.005413401 | 0.05066757  | 0.1798261   | 0.833855532 |
| 1448510_t    | C8163                   | EXPRESSED SEQUENCE C8163                                                                          | 0.005439075 | 0.3997485   | 0.1725436   | 2.021083379 |
| 1449428_t    | CLDN18                  | CLAUDIN 18                                                                                        | 0.005475912 | 0.08608799  | 0.1087346   | 2.966535036 |
| 1426338_t    | Ning1                   | neirin G1                                                                                         | 0.005492406 | 0.9873319   | 0.383038    | 1.59817892  |
| 1414388_at   | ---                     | ---                                                                                               | 0.005515515 | 0.062806453 | 0.933701    | 0.757606494 |
| 1436012_s_at | SCR2N                   | SCRIBIN 2                                                                                         | 0.005575258 | 0.6719427   | 0.0589909   | 0.608852463 |
| 1458536_at   | PAPPLA                  | POLY (A) POLYMERASE ALPHA                                                                         | 0.005588645 | 0.000920887 | 0.2032004   | 1.15477092  |
| 1430359_at   | Pgk5l1b                 | phosphatidylinositol-4-phosphate 5-kinase, type 1 alpha                                           | 0.005614645 | 0.3992819   | 0.7204769   | 0.8909139   |
| 1421992_s_at | Ighp4                   | immunoglobulin heavy chain binding protein 4                                                      | 0.005676891 | 0.734703    | 0.9000421   | 1.40076989  |
| 1452424_at   | Gpr23                   | G protein-coupled receptor 23                                                                     | 0.005692563 | 0.5228424   | 0.08044831  | 0.703907552 |
| 1448967_at   | NIPSNAP3A               | NIPSNAP HOMOLOGY 3A (C. ILEGNAS)                                                                  | 0.005703073 | 0.279174    | 0.3291376   | 0.73240746  |
| 1441531_at   | PLC4A                   | PHOSPHOLIPASE C, BETA 4                                                                           | 0.005745859 | 0.9892666   | 0.4782513   | 1.57419803  |
| 1446309_at   | 5830483C08R1K           | RIKEN CDNA 5830483C08 GENE                                                                        | 0.005767372 | 0.6462055   | 0.104764    | 0.408168062 |
| 145129_at    | CALB2                   | CALBINDIN 2                                                                                       | 0.005772721 | 0.9002358   | 0.1924127   | 1.311778867 |
| 1443216_at   | TBC1D15                 | TBC1 DOMAIN FAMILY, MEMBER 5                                                                      | 0.005800485 | 0.033448689 | 0.0814203   | 0.642131082 |
| 1431651_at   | C330001K17R1K           | RIKEN CDNA C330001K17 GENE                                                                        | 0.005898404 | 0.8699784   | 0.3840667   | 1.7787771   |
| 1458483_at   | TBC1D26                 | TBC1 DOMAIN FAMILY, MEMBER 8                                                                      | 0.005908004 | 0.9324195   | 0.14543117  | 1.214401197 |
| 1457391_at   | VAMP3                   | VESICLE-ASSOCIATED MEMBRANE PROTEIN 3                                                             | 0.005909972 | 0.7887013   | 0.9673007   | 3.53349433  |
| 1446942_at   | ---                     | ---                                                                                               | 0.005934768 | 0.4599237   | 0.4030151   | 2.58720604  |
| 1458449_at   | P90002H16R1K            | HYPOTHETICAL PROTEIN LOC54241                                                                     | 0.005956174 | 0.1841568   | 0.121440197 | 1.214401197 |
| 1456874_at   | Fhl2                    | fibronectin leucine rich transmembrane protein 2                                                  | 0.005995465 | 0.08484813  | 0.1378313   | 1.20643191  |
| 1434948_at   | RAB11FP2                | RAB11 FAMILY INTERACTING PROTEIN 2 (CLASS 1)                                                      | 0.006015805 | 0.1114777   | 0.079723    | 0.78249968  |
| 1424278_s_at | ---                     | ---                                                                                               | 0.006031929 | 0.1239146   | 0.064515219 | 0.645132519 |
| 1454073_at   | 493045D15R1K            | RIKEN CDNA 493045D15 GENE                                                                         | 0.006034242 | 0.31639479  | 0.0602386   | 1.486615611 |
| 1427410_at   | DLI12                   | DELETED IN LYMPHOCTIC LEUKEMIA 2                                                                  | 0.006088899 | 0.2599242   | 0.8329006   | 0.57890649  |
| 1455819_at   | Rodi                    | RODI regulator of differentiation 1 (S. pombe)                                                    | 0.00612525  | 0.1503841   | 0.0432274   | 0.83272362  |
| 1437769_at   | EPIDRMAL                | EPIDERMAL GROWTH FACTOR RECEPTOR PATHWAY SUBSTRATE 15-LIKE 1                                      | 0.006134319 | 0.8748785   |             |             |

|            |                               |                                                                                                      |             |             |             |             |
|------------|-------------------------------|------------------------------------------------------------------------------------------------------|-------------|-------------|-------------|-------------|
| 1449422_at | Cd8a                          | cd8alpha 4                                                                                           | 0.006904786 | 0.1547909   | 0.9027728   | 1.469933291 |
| 1449435_at | EST                           |                                                                                                      | 0.006909815 | 0.9751701   | 0.9734023   | 0.451632118 |
| 1446209_at | USP40                         | UBIQUITIN SPECIFIC PEPTIDASE 40                                                                      | 0.006914489 | 0.3928723   | 0.0925498   | 0.82193471  |
| 1432219_at | NOL9                          | NUCLEOLAR PROTEIN 9                                                                                  | 0.006914772 | 0.0827243   | 0.7154579   | 0.563052594 |
| 1420238_at | ECTONUCLEOTIDIC PHOSPHATASE 1 | ectonucleotidic phosphatase 1                                                                        | 0.006914917 | 0.0827308   | 0.0827308   | 2.480390004 |
| 1434049_at | ENTPD3                        | ECTONUCLEOTIDIC PHOSPHATASE 3                                                                        | 0.00691792  | 0.9306409   | 0.3306669   | 0.746652943 |
| 1458205_at | ---                           | ---                                                                                                  | 0.006919879 | 0.2666164   | 0.8301647   | 1.520639228 |
| 1425201_at | HY11                          | HYDROXYPRUVATE ISOMERASE HOMOLOG (L. COLI)                                                           | 0.006922227 | 0.2413584   | 0.625010716 | 0.7943593   |
| 1455225_at | PAQR9                         | PROGESTIN AND ADIPOU RECEPTOR FAMILY MEMBER IX                                                       | 0.006926626 | 0.2644281   | 0.7495527   | 0.862512628 |
| 1456773_at | NUP12                         | NUCLEOPORIN LIKE 2                                                                                   | 0.00694474  | 0.1668417   | 0.1668417   | 0.76274132  |
| 1436652_at | ABC5                          | ATP-BINDING CASSETTE, SUB-FAMILY C (CFTRMRP), MEMBER 5                                               | 0.006946804 | 0.00211238  | 0.3209479   | 0.729683769 |
| 1436447_at | AS5002N12R1K                  | RIKEN CDNA AS5002N12R1K                                                                              | 0.007007768 | 0.0129824   | 0.6482606   | 0.802476178 |
| 1458114_at | SAMD12                        | STERILE ALPHA MOTIF DOMAIN CONTAINING 12                                                             | 0.00705429  | 0.1937525   | 0.7920953   | 1.3848455   |
| 1457409_at | FUT9                          | FUCOSYLTRANSFERASE 9                                                                                 | 0.007062036 | 0.0471627   | 0.5457826   | 1.218953435 |
| 1428292_at | SIROH1720R1K                  | RIKEN CDNA SIROH1720R1K                                                                              | 0.007063343 | 0.004661752 | 0.630317    | 0.843766706 |
| 1417933_at | IGFBP6                        | INSULIN-LIKE GROWTH FACTOR BINDING PROTEIN 6                                                         | 0.007094081 | 0.5560857   | 0.4583711   | 1.328700654 |
| 1440250_at | COL4A4                        | COLLAGEN, TYPE IV, ALPHA 4                                                                           | 0.007133571 | 0.1134811   | 0.3131689   | 2.014964511 |
| 1431601_at | Prk4                          | protein tyrosine phosphatase, receptor type, K                                                       | 0.007174783 | 0.2823546   | 0.3751991   | 1.179492038 |
| 1449800_at | GABRD                         | GAMMA-AMINO-BUTYRIC ACID (GABA-) RECEPTOR, SUBUNIT DELTA                                             | 0.007181606 | 0.04107823  | 0.2641572   | 1.337365112 |
| 1440587_at | ---                           | ---                                                                                                  | 0.007183332 | 0.000183732 | 0.1040437   | 0.679796607 |
| 1429076_at | Man1a2                        | mannosidase, alpha, class 1A, member 2                                                               | 0.007193738 | 0.01204148  | 0.620317    | 1.251464749 |
| 1423630_at | CYGB                          | STELLATE CELL ACTIVATION ASSOCIATED PROTEIN                                                          | 0.00721435  | 0.0173972   | 0.7588963   | 0.742395123 |
| 1453946_at | SCPCAG8                       | RIKEN CDNA 5730470G24 GENE                                                                           | 0.007242107 | 2.49082266  | 0.424258    | 1.211652796 |
| 1453791_at | PPP1R1A                       | PROTEIN PHOSPHATASE 1, REGULATORY (INHIBITOR) SUBUNIT 1A                                             | 0.007304426 | 0.001967042 | 0.8610148   | 0.693891361 |
| 1453533_at | 4913403008R1K                 | RIKEN CDNA 4913403008 GENE                                                                           | 0.007335231 | 0.7714802   | 0.6311808   | 0.727299552 |
| 1424007_at | GDF10                         | GROWTH DIFFERENTIATION FACTOR 10                                                                     | 0.007338877 | 0.1830775   | 0.189002    | 3.36588553  |
| 1450440_at | Gfzl1                         | glial cell line derived neurotrophic factor family receptor alpha 1                                  | 0.007344236 | 0.001967042 | 0.8610148   | 0.693891361 |
| 1453682_at | GABRP2                        | GA REPEAT BINDING PROTEIN, BETA 2                                                                    | 0.007378877 | 0.1830775   | 0.8479208   | 0.641622534 |
| 1436652_at | 583041808R1K                  | RIKEN CDNA 583041808 GENE                                                                            | 0.007409393 | 0.48975     | 0.1117227   | 0.767799994 |
| 1439264_at | SCN5A                         | SODIUM CHANNEL, VOLTAGE-GATED, TYPE II, ALPHA                                                        | 0.007409846 | 0.6161013   | 0.723898276 | 0.623898276 |
| 1439723_at | 573059019R1K                  | RIKEN CDNA 573059019 GENE                                                                            | 0.007429916 | 0.760052    | 0.1057512   | 0.621545263 |
| 1455424_at | ---                           | ---                                                                                                  | 0.007457173 | 0.2093484   | 0.105414    | 0.702077058 |
| 1422353_at | PRK4E3                        | PROU DOMAIN, CLASS 4, TRANSCRIPTION FACTOR 3                                                         | 0.007478205 | 6.767322745 | 0.5337273   | 1.698262112 |
| 1429537_at | 573040606R1K                  | RIKEN CDNA 573040606 GENE                                                                            | 0.007528175 | 0.2477173   | 0.4570599   | 1.25412784  |
| 1445394_at | ---                           | ---                                                                                                  | 0.007533778 | 0.4585504   | 0.5272905   | 1.586158867 |
| 1424605_at | Prk45                         | proteinase convertase subunit kexin type 5                                                           | 0.007579398 | 0.1349809   | 0.136558    | 0.711510313 |
| 1458656_at | AW50198                       | EXPRESSED SEQUENCE AW50198                                                                           | 0.007584741 | 0.00904596  | 0.9033099   | 0.75126186  |
| 1449206_at | SYPL2                         | SYNAPOTOPHYSIN-LIKE 2                                                                                | 0.007585852 | 0.1976434   | 0.13624919  | 1.451612377 |
| 1437791_at | ---                           | ---                                                                                                  | 0.007592198 | 0.7711823   | 0.1444279   | 0.506885261 |
| 1428236_at | MBNL3                         | MUSCULIN-LIKE 3 (DROSOPHILA)                                                                         | 0.007597254 | 0.0352181   | 0.8823745   | 0.285937675 |
| 1439616_at | ---                           | ---                                                                                                  | 0.007625274 | 0.3885251   | 0.5274222   | 0.54926151  |
| 1422208_at | Gnb5                          | guanine nucleotide binding protein, beta 5                                                           | 0.007627874 | 0.08941653  | 0.3040789   | 1.237665708 |
| 1435131_at | 478054121R1K                  | RIKEN CDNA 478054121R1K                                                                              | 0.007678752 | 0.2839031   | 0.6301504   | 0.792134481 |
| 1443618_at | PDZD2                         | PDZ DOMAIN CONTAINING 2                                                                              | 0.007631083 | 0.2040155   | 0.4128052   | 2.767286898 |
| 1459679_at | Myo1b                         | myosin II                                                                                            | 0.007669349 | 0.1777886   | 0.2904401   | 1.511761639 |
| 1425600_at | FLC3B1                        | FRODOPHILINASE C, BETA 1                                                                             | 0.007723938 | 0.0001402   | 0.15254188  | 0.6301504   |
| 1435608_at | Zarf1 // LOC631806            | zinc and ring finger 3 // similar to Goliath homolog precursor (Ring finger protein 130) (R-goliath) | 0.007733432 | 0.16775309  | 0.5193117   | 0.781454923 |
| 1417149_at | PAH2A                         | PROCOLLAGEN-PROLINE, 2-OXOGLUTARATE-4-OXYGENASE (PROLINE 4-HYDROXYLASE), ALPHA 1 POLYPEPTIDE         | 0.007784709 | 0.2899668   | 0.1140307   | 1.262435706 |
| 1437763_at | DCTN1D3                       | DEFECTIVE IN COULI NEURONITIS 1                                                                      | 0.007789848 | 0.5502901   | 0.227787466 | 0.9033099   |
| 1425051_at | loc1                          | isochromatid domain containing 1                                                                     | 0.00780368  | 0.02029273  | 0.6574329   | 0.789022812 |
| 1427149_at | PLEKH16A                      | HYPOTHETICAL PROTEIN BC031133                                                                        | 0.007821571 | 0.06454198  | 0.2795887   | 1.337455403 |
| 1456648_at | Man1a                         | mannosidase 1, alpha                                                                                 | 0.007849886 | 0.4379848   | 0.3399422   | 1.233438744 |
| 1434186_at | Cpr23                         | G protein-coupled receptor 23                                                                        | 0.007953949 | 0.8614117   | 0.7089966   | 0.60662875  |
| 1438431_at | Grit                          | Rho GTPase-activating protein                                                                        | 0.007978166 | 0.0005411   | 0.1540918   | 1.14235706  |
| 1438439_at | RIKEN CDNA 1700016G14R1K      | RIKEN CDNA 1700016G14 GENE                                                                           | 0.008002319 | 0.8257489   | 0.405076948 | 0.805076948 |
| 1448327_at | ACTN2                         | ACTIN ALPHA 2                                                                                        | 0.008006363 | 0.5380552   | 0.9672326   | 0.821425542 |
| 1417967_at | MMS19L                        | MMS19 (MEI-TS1, CERVISIAE)-LIKE                                                                      | 0.008037683 | 0.1161892   | 0.550007    | 0.818469566 |
| 1439665_at | MM2                           | G protein-coupled receptor 2                                                                         | 0.008041993 | 0.1482931   | 0.5521721   | 0.609548307 |
| 1418061_at | LTRP2                         | LATENT TRANSMEMBRANE GROWTH FACTOR BETA BINDING PROTEIN 2                                            | 0.008046605 | 0.04286238  | 0.3412427   | 1.99593485  |
| 1434313_at | 6330407D12R1K                 | RIKEN CDNA 6330407D12 GENE                                                                           | 0.008055855 | 0.7796855   | 0.4099508   | 0.609665447 |
| 1433169_at | 583045623R1K                  | RIKEN CDNA 583045623 GENE                                                                            | 0.008079102 | 0.00065786  | 0.1927962   | 0.740994277 |
| 1439608_at | ---                           | ---                                                                                                  | 0.008087928 | 0.6285067   | 0.695035    | 0.745201131 |
| 1448914_at | Csf1                          | colony stimulating factor 1 (macrophage)                                                             | 0.00813638  | 0.9980167   | 0.253456    | 0.791371963 |
| 1455074_at | EFCAB1                        | EF HAND CALCIUM BINDING DOMAIN 1                                                                     | 0.008150894 | 0.4957243   | 0.2315038   | 0.767892529 |
| 1456591_at | AKAP3                         | AKINASE (PKA) ANCHOR PROTEIN 3                                                                       | 0.008152225 | 0.4609395   | 0.375491    | 0.754780576 |
| 1423235_at | AP3B1                         | ADAPTOR-RELATED PROTEIN COMPLEX 3, BETA 1 SUBUNIT                                                    | 0.008152543 | 0.0519994   | 0.8078833   | 0.818662504 |
| 1434760_at | Lrrtm3                        | leucine rich repeat transmembrane neuronal 3                                                         | 0.008195586 | 0.7671032   | 0.4415741   | 1.389034991 |
| 1429613_at | PANK1                         | PANTOTHENATE KINASE 1                                                                                | 0.008252602 | 0.3989817   | 0.466478755 | 0.805076948 |
| 1435607_at | GRM2                          | G PROTEIN-COUPLED RECEPTOR, FAMILY C, GROUP 1, MEMBER B                                              | 0.008262655 | 0.0189381   | 0.8601461   | 0.735642886 |
| 1451406_at | Prk45                         | proteinase convertase subunit kexin type 5                                                           | 0.008265029 | 0.8070914   | 0.3928511   | 0.619071576 |
| 1454011_at | PRK2                          | PROTEIN KINASE 2                                                                                     | 0.008266001 | 0.00042988  | 0.717193037 | 0.695035    |
| 1446353_at | TUBB6                         | TUBULIN, BETA 6                                                                                      | 0.008317564 | 0.02429681  | 0.5593976   | 0.76179581  |
| 1445427_at | NLK                           | NEMO LIKE KINASE                                                                                     | 0.008332603 | 0.0470269   | 0.85544     | 1.618718777 |
| 1448744_at | GALNS                         | GALACTOSAMINE (N-ACETYL)-6-SULFATE SULFATASE                                                         | 0.008337436 | 0.23848     | 0.628428    | 0.787898187 |
| 1424963_at | RPIH1                         | RETINETS PIGMENTOSA 1 HOMOLOG (HUMAN)                                                                | 0.008402466 | 0.2146266   | 0.561245    | 0.397555268 |
| 1441142_at | 2700081122R1K                 | RIKEN CDNA 2700081122 GENE                                                                           | 0.008417595 | 0.3457895   | 0.7701847   | 0.697525838 |
| 1458742_at | LPH3                          | LACTOPHILIN 3                                                                                        | 0.008422566 | 0.5887265   | 0.4786684   | 1.229575021 |
| 1448797_at | ELK3                          | ELK3, MEMBER OF ETS ONCOGENE FAMILY                                                                  | 0.00842799  | 0.0818405   | 0.304266    | 0.751030488 |
| 1451627_at | SLC12A2                       | SOLITE CARRIER FAMILY 1 (GLIAL HIGH AFFINITY GLUTAMATE TRANSPORTER), MEMBER 2                        | 0.008440962 | 0.1332844   | 0.2401468   | 1.179999799 |
| 1450045_at | SNR11                         | SNRIN-LIKE 1                                                                                         | 0.008445086 | 0.03035547  | 0.6039187   | 1.113393914 |
| 1448901_at | CPXM1                         | CARBOXYPEPTIDASE X1 (M14 FAMILY)                                                                     | 0.008448442 | 0.00100278  | 0.0784653   | 1.12684713  |
| 1426608_at | ---                           | ---                                                                                                  | 0.008448893 | 0.75179     | 0.102405    | 0.56878069  |
| 1458433_at | 993345106R1K                  | RIKEN CDNA 993345106 GENE                                                                            | 0.008476647 | 0.4777715   | 0.4933274   | 0.808998123 |
| 145892_at  | Ax31                          | axonal semaphorin 3 (Drosophila)                                                                     | 0.00848125  | 0.01028027  | 0.0624934   | 1.54176585  |
| 1453713_at | 4930546H06R1K                 | RIKEN CDNA 4930546H06 GENE                                                                           | 0.008511452 | 0.0401839   | 0.1510929   | 1.248971939 |
| 1436299_at | Clb5                          | glutaminase                                                                                          | 0.008530788 | 0.1511925   | 0.46136     | 0.702920376 |
| 1438476_at | CHD4                          | CHROMATIN REMODELING 4                                                                               | 0.008543234 | 0.0489403   | 0.28391     | 1.330474895 |
| 1456871_at | PHF20L1                       | PHD FINGER PROTEIN 20-LIKE 1                                                                         | 0.008546681 | 0.00017564  | 0.08451474  | 1.096811174 |
| 1431337_at | 1810055112R1K                 | RIKEN CDNA 1810055112 GENE                                                                           | 0.00855999  | 0.0470633   | 0.3050572   | 0.859953713 |
| 1440001_at | LOC311480                     | HYPOTHETICAL LOC311480                                                                               | 0.008560497 | 0.2114927   | 0.33230246  | 0.73520246  |
| 1439697_at | Il1rap                        | interleukin 1 receptor accessory protein                                                             | 0.00858601  | 0.00914225  | 0.986754    | 0.701656569 |
| 1436234_at | 4732471D19R1K                 | RIKEN CDNA 4732471D19 GENE                                                                           | 0.008617343 | 0.8901586   | 0.7998522   | 0.785588777 |
| 1439141_at | AKZ20484                      | CDNA SEQUENCE AKZ20484                                                                               | 0.008681181 | 0.8292599   | 0.375491    | 0.737648663 |
| 1440032_at | E130008017R1K                 | RIKEN CDNA E130008017 GENE                                                                           | 0.008688106 | 0.00232362  | 0.2432511   | 1.315568416 |
| 1460220_at | Csf1                          | colony stimulating factor 1 (macrophage)                                                             | 0.008694793 | 0.5975261   | 0.7611148   | 0.772211122 |
| 1453710_at | MEM116                        | RIKEN CDNA 4930513P12 GENE                                                                           | 0.008701855 | 0.5827109   | 0.628401776 | 0.628401776 |
| 1426560_at | Nptx                          | neuropilin                                                                                           | 0.008715761 | 0.7615768   | 0.4793632   | 0.61533869  |
| 1431871_at | TNXCDC3                       | THIOREDOXIN DOMAIN CONTAINING 3 (SPERMATOZOEA)                                                       | 0.00871967  | 0.0642027   | 0.6293458   | 0.42350323  |
| 1417626_at | Hsd4dp                        | STEREO-O-ACYLTRANSFERASE 1 (myogmatid)                                                               | 0.008722797 | 0.4112809   | 0.6293458   | 0.296798628 |
| 1434761_at | Lrrtm3                        | leucine rich repeat transmembrane neuronal 3                                                         | 0.008775104 | 0.8152745   | 0.7440047   | 0.43103336  |
| 1429183_at | Prp2                          | plakophilin 2                                                                                        | 0.00878133  | 4.2997765   | 0.8383278   | 0.74247857  |
| 1438096_at | 99334918R1K                   | RIKEN CDNA 99334918 GENE                                                                             | 0.008834289 | 0.0243826   | 0.628401776 | 0.628401776 |
| 1434889_at | PLEKH17                       | PLECKSTRIN HOMOLOGUY DOMAIN CONTAINING, FAMILY A MEMBER 7                                            | 0.0088424   | 0.7051713   | 0.911013    | 1.48736009  |
| 1432746_at | 6030442121R1K                 | RIKEN CDNA 6030442121 GENE                                                                           | 0.008908806 | 0.5091955   | 0.1642426   | 0.719948419 |
| 1425272_at | EMP2                          | EPITHELIAL-MEMBRANE PROTEIN 2                                                                        | 0.008910297 | 0.0320319   | 0.810591    | 1.269157592 |
| 1437858_at | Dysp193                       | dysp19-like 3 (C. elegans)                                                                           | 0.008948078 | 0.3246398   | 0.866994    | 1.259931902 |
| 1435310_at | 4930589M24R1K                 | RIKEN CDNA 4930589M24R1K                                                                             | 0.008972021 | 0.0381051   | 0.7184091   | 0.808005145 |
| 1425581_at | Galn7                         | UDP-N-acetyl-alpha-D-galactosamine polypeptide N-acetyl-galactosyltransferase 7                      | 0.008973631 | 0.3308477   | 0.107558905 | 0.644760736 |
| 1422255_at | KCN4A                         | POTASSIUM VOLTAGE-GATED CHANNEL, SHAKER-RELATED SUBFAMILY, MEMBER 4                                  | 0.008987567 | 0.07946182  | 0.3706519   | 1.270113479 |
| 1437256_at | KCNJND5                       | ---                                                                                                  | 0.009086153 | 0.0116625   | 0.6345039   | 0.808477017 |
| 1424708_at | ---                           | ---                                                                                                  | 0.00913782  | 0.0438424   | 0.109173    | 1.295297376 |
| 1436134_at | DM32                          | GENE MODEL 632 (NCBI)                                                                                | 0.009229634 | 0.0235799   | 0.4842044   | 0.808441062 |
| 1436177_at | KCNJ2                         | transiently associated                                                                               | 0.009233465 | 0.05609003  | 0.8591316   | 0.816784571 |
| 1457152_at | KCNB2                         | POTASSIUM VOLTAGE GATED CHANNEL, SHAB-RELATED SUBFAMILY, MEMBER 2                                    | 0.009263847 | 0.00014839  | 0.6174124   | 0.367722582 |
| 1417800_at | PARP2                         | POLY (ADP-RIBOSE) POLYMERASE FAMILY MEMBER 2                                                         | 0.009266755 | 0.1257564   | 0.8332738   | 0.797254013 |
| 1436714_at | LPP                           | LIM DOMAIN CONTAINING PREFERRED TRANSLATION PARTNER IN LIPOMA                                        | 0.009301955 | 0.00813335  | 0.1574878   | 0.823262572 |
| 1433325_at | 9330154F10R1K                 | RIKEN CDNA 9330154F10 GENE                                                                           | 0.009448344 | 0.2353659   | 0.9484249   | 1.362217734 |
| 1438364_at | CNCG2                         | CYCLIN G2                                                                                            | 0.009472471 | 0.0007216   |             |             |

|              |                 |                                                                            |            |             |              |              |
|--------------|-----------------|----------------------------------------------------------------------------|------------|-------------|--------------|--------------|
| 1418639_at   | SFTPC           | SURFACTANT ASSOCIATED PROTEIN C                                            | 0.01034834 | 0.1213087   | 0.1159914    | 0.839444169  |
| 1419325_at   | FADS2           | FATTY ACID DESATURASE 2                                                    | 0.01032385 | 0.80052414  | 1.11448989   | 0.7866487    |
| 1419971_at   | ---             | ---                                                                        | 0.01037531 | 0.2275356   | 0.8498135    | 1.997119516  |
| 1441055_at   | R75368          | EXPRESSED SEQUENCE R75368                                                  | 0.0104231  | 0.0288314   | 0.4702256    | 0.7493488    |
| 1455700_at   | MTEF3D3         | MTEF1 DOMAIN CONTAINING 3                                                  | 0.01045027 | 0.9514537   | 0.622318999  | 0.731814507  |
| 1437095_at   | Tpsta18         | tetraepin 18                                                               | 0.01045558 | 0.9792629   | 0.9467906    | 0.390002894  |
| 1438275_at   | C130046Z22RK    | RIKEN CDNA C130046Z22 GENE                                                 | 0.01047562 | 0.318181    | 1.020234     | 1.29829073   |
| 1422616_at   | MUT1H           | MUT1 HOMOLOG (FOXO, CXX1)                                                  | 0.01048202 | 0.2654607   | 0.4447375168 | 0.4603348    |
| 1441251_at   | 201000141RK     | RIKEN CDNA 201000141 GENE                                                  | 0.01048453 | 0.1778707   | 1.024071     | 1.386916689  |
| 1439524_at   | DNAB74          | DNAB (HSP40) HOMOLOG, SUBFAMILY B, MEMBER 4                                | 0.0104892  | 0.2976703   | 0.83170274   | 0.83170274   |
| 1450522_at   | H110            | H1 HISTONE FAMILY, MEMBER 0                                                | 0.01052352 | 0.80039044  | 0.2237754    | 0.789377461  |
| 1451498_at   | BC004853        | CDNA SEQUENCE BC004853                                                     | 0.01059113 | 0.9569107   | 0.65262318   | 0.65262318   |
| 1458633_at   | SNX8            | SORTING NEXIN 8                                                            | 0.01062554 | 0.275177    | 0.676396     | 1.565806203  |
| 1452824_at   | 493041212RK     | RIKEN CDNA 493041212 GENE                                                  | 0.01063373 | 0.5134213   | 1.083398     | 0.448900045  |
| 1419794_at   | S110089E131RK   | RIKEN CDNA S110089E131 GENE                                                | 0.01064262 | 0.8462752   | 0.5986642    | 0.558066489  |
| 1457181_at   | ARHGFE11        | RHO GUANINE NUCLEOTIDE EXCHANGE FACTOR (GEF) 11                            | 0.01066952 | 0.1293303   | 1.0200275    | 0.807720383  |
| 1456114_at   | CDS1            | CDP-DIACYLGLYCEROL SYNTHASE 1                                              | 0.01071725 | 0.1247904   | 0.3018718    | 1.122899647  |
| 1457000_at   | BC060207        | CDNA SEQUENCE BC060207                                                     | 0.01070725 | 0.9854839   | 0.925276     | 1.714781359  |
| 1433466_at   | A1467606        | EXPRESSED SEQUENCE A1467606                                                | 0.01078665 | 0.5182186   | 0.3329924    | 0.635199275  |
| 1416403_at   | Absc10          | ATP-binding cassette, sub-family B (MDR/TAP), member 10                    | 0.01079979 | 0.00757413  | 0.7095446    | 0.716820413  |
| 1455965_at   | NAV2            | NAV2 ONCOGENE                                                              | 0.01080294 | 0.391782    | 0.800992     | 0.723925175  |
| 1425709_at   | Raf17           | raf ring finger protein 17                                                 | 0.01091426 | 0.3649866   | 0.3271822    | 1.898165565  |
| 1445055_at   | ---             | ---                                                                        | 0.01092756 | 0.4176985   | 0.2036165    | 0.365599723  |
| 1452278_at   | U1-CE1          | HECT DOMAIN AND ANKYRIN REPEAT CONTAINING, EU3 UBIQUITIN PROTEIN LIGASE 1  | 0.01092284 | 0.0975687   | 0.4007167    | 0.739086669  |
| 1418631_at   | MPDZ            | MULTIPLE PDZ DOMAIN PROTEIN                                                | 0.01096294 | 0.1786143   | 0.1545866    | 1.24194177   |
| 1436587_at   | 1700123D08RK    | RIKEN CDNA 1700123D08 GENE                                                 | 0.01097554 | 0.811347    | 0.06708753   | 1.309446332  |
| 1444937_at   | ---             | ---                                                                        | 0.01101897 | 0.4021398   | 0.2587451    | 2.158136097  |
| 1423786_at   | 8430410A17RK    | RIKEN CDNA 8430410A17 GENE                                                 | 0.0110113  | 0.2532223   | 0.0956537    | 1.109760876  |
| 1421520_at   | Jph1            | junctionphi 1                                                              | 0.01102413 | 0.001021108 | 0.5532901    | 0.667897173  |
| 1434315_at   | SFM0B2          | RIKEN CDNA D33000906 GENE                                                  | 0.01103365 | 0.0404545   | 0.700202291  | 0.700202291  |
| 1433702_at   | D19WSU112E      | DNA SEGMENT, CHR. 19, WAYNE STATE UNIVERSITY 12, EXPRESSED                 | 0.01102925 | 0.0824922   | 0.5112609    | 0.757777072  |
| 1453016_at   | 2900042B11RK    | RIKEN CDNA 2900042B11 GENE                                                 | 0.01108889 | 0.3404909   | 0.783899     | 0.816256997  |
| 1450663_at   | SPTZ            | SPTZ ADENOSINE ZIP 1                                                       | 0.01108849 | 0.2726277   | 0.1752224    | 2.504974012  |
| 1456960_at   | ADK             | ADENOSINE KINASE                                                           | 0.01108892 | 0.099461193 | 0.3832622    | 0.649649093  |
| 1459336_at   | GLUCY1A2        | GUANYLATE CYCLASE 1, SOLUBLE, ALPHA 2                                      | 0.01109812 | 0.4375056   | 0.3104261    | 1.886058041  |
| 1418753_at   | GPFT2           | GLUTAMINE FRUCTURYL-6-PHOSPHATE TRANSAMINASE 2                             | 0.01109897 | 0.5442221   | 0.2881065    | 1.211231251  |
| 1464627_at   | ADAM28          | ADENYLETIRIN AND METALLOPEPTIDASE DOMAIN 28                                | 0.01103278 | 0.441273    | 0.7102764    | 0.492608674  |
| 1458976_at   | C23003316RK     | RIKEN CDNA C23003316 GENE                                                  | 0.0111129  | 0.795688    | 0.8014815    | 0.61291946   |
| 1437287_at   | SETDB1          | SET DOMAIN CONTAINING 16                                                   | 0.011147   | 0.478676-05 | 0.5372679    | 0.820400499  |
| 1417922_at   | SLC17A7         | SIGNAL TRANSDUCING ADAPTOR MOLECULE (SH3 domain and ITAM motif) 7          | 0.0111827  | 0.3433898   | 0.4717075    | 0.492608674  |
| 1416975_at   | Stam2           | signal transducing adaptor molecule (SH3 domain and ITAM motif) 2          | 0.01123585 | 0.001690013 | 0.2302767    | 1.612127905  |
| 1427647_at   | BC022150        | CDNA SEQUENCE BC022150                                                     | 0.01124059 | 0.09890485  | 0.1694537    | 1.914042425  |
| 1427198_at   | BC022960        | CDNA SEQUENCE BC022960                                                     | 0.0112961  | 0.107323    | 0.7331254    | 0.61341721   |
| 1418237_x_at | COL18A1         | PROCOLLAGEN, TYPE XVIII, ALPHA 1                                           | 0.01132114 | 0.2761782   | 0.8002139    | 2.487343723  |
| 1434925_at   | 4833424015RK    | RIKEN CDNA 4833424015 GENE                                                 | 0.01132419 | 0.4024032   | 0.1050575    | 1.18618341   |
| 1430864_at   | TTL19           | TITRIN TYROSINE LIKASE LIKE FAMILY 9                                       | 0.01135542 | 0.1012119   | 0.7315165    | 1.651368475  |
| 1460448_x_at | Tcl14           | tetratricopeptide repeat domain 14                                         | 0.01141797 | 0.001267684 | 0.4690196    | 0.806307804  |
| 1436407_at   | 943009097RK     | RIKEN CDNA 943009097 GENE                                                  | 0.01146449 | 0.8524252   | 0.3099961    | 0.752269137  |
| 1422292_at   | RCTD1           | POTASSIUM CHANNEL TETRAMERISATION DOMAIN CONTAINING 1                      | 0.01146774 | 0.807595848 | 0.2309451    | 0.729087626  |
| 1435808_at   | A230051G13RK    | RIKEN CDNA A230051G13 GENE                                                 | 0.01153606 | 0.644522    | 0.3996815    | 0.870854235  |
| 1424813_at   | DGKI            | DIACYLGLYCEROL KINASE, IOTA                                                | 0.01163317 | 0.1063697   | 0.2820211    | 1.237232331  |
| 1430844_at   | 1700018M17RK    | RIKEN CDNA 1700018M17 GENE                                                 | 0.01163469 | 0.02104835  | 0.167682478  | 0.53332106   |
| 1418141_at   | DCX             | DOUBLECORTIN                                                               | 0.01166534 | 0.6994953   | 0.266642     | 1.202735821  |
| 1430088_at   | 3000020J31RK    | RIKEN CDNA 3000020J31 GENE                                                 | 0.01171093 | 0.5796435   | 0.8346046    | 0.831751499  |
| 1445095_at   | ATXN1           | ATAXIN 1                                                                   | 0.01171942 | 0.4090984   | 0.1329378    | 1.414331204  |
| 1453755_at   | Lsm11           | U7 snRNP-specific Sm-like protein LSM11                                    | 0.01172717 | 0.7627368   | 0.9173647    | 1.380106141  |
| 1434506_at   | ARID2           | AT RICH INTERACTING DOMAIN 2 (ARID-REFX LIKE)                              | 0.0117424  | 0.00747552  | 0.1574817    | 1.075764056  |
| 1448312_at   | Pfak2           | proteomim convariant substitution/keum type 2                              | 0.01174943 | 0.0334148   | 0.14809951   | 1.144699541  |
| 1442598_at   | ---             | ---                                                                        | 0.01176371 | 0.1660262   | 0.458239     | 1.419506792  |
| 1440092_at   | SERAC1          | DNA SEGMENT, CHR 17, ERATO DOI 141, EXPRESSED                              | 0.01178038 | 0.2261766   | 0.5468789    | 1.263678148  |
| 1425275_at   | Asph            | aspartate-beta-hydroxylase                                                 | 0.01180459 | 0.0477687   | 0.1227291    | 0.792625384  |
| 1434955_at   | Mem81           | MEMBRANE ASSOCIATED RING FINGER (CHRC4) 1                                  | 0.0119647  | 0.8624759   | 0.1642616    | 0.799898075  |
| 1452675_at   | RBM22           | RNA BINDING MOTIF PROTEIN 22                                               | 0.0119781  | 0.4322899   | 0.5184226    | 0.719355662  |
| 1460144_at   | BC052040        | CDNA SEQUENCE BC052040                                                     | 0.01198893 | 0.1660718   | 0.2247996    | 0.68291989   |
| 1428623_at   | PFXNA1          | PFXNA1                                                                     | 0.0119748  | 0.5898255   | 0.121451184  | 0.8087327    |
| 1422492_at   | CPOX            | COPROPORPHYRINOGEN OXIDASE                                                 | 0.0120276  | 0.0117468   | 0.8117526    | 0.812938346  |
| 1429881_at   | Ahgep15         | Rho GTPase activating protein 15                                           | 0.012063   | 0.009774056 | 0.4845403    | 0.548441638  |
| 1428852_at   | DOCK3           | REGULATOR OF CYTOKINESIS 3                                                 | 0.01208976 | 0.2071816   | 0.3087327    | 1.214383535  |
| 1416812_at   | THA1            | CYTOTOXIC GRANULE-ASSOCIATED RNA BINDING PROTEIN 1                         | 0.01209346 | 1.222931-06 | 0.3142259    | 0.7700092    |
| 1453596_at   | ID2             | INHIBITOR OF DNA BINDING 2                                                 | 0.012124   | 0.002063004 | 0.1101049    | 1.009292327  |
| 1458182_at   | RBM18           | RNA BINDING MOTIF PROTEIN 18                                               | 0.01225667 | 0.9024916   | 0.855488074  | 0.855488074  |
| 1438183_x_at | SYND            | SORBITOL DEHYDROGENASE                                                     | 0.01229553 | 0.4123898   | 0.3619913    | 0.733981401  |
| 1427045_at   | SORP            | RIKEN CDNA 9030217H11 GENE                                                 | 0.01231766 | 0.3791388   | 0.685056     | 1.32828962   |
| 1455097_at   | 130101E033RK    | RIKEN CDNA 130101E033 GENE                                                 | 0.01232541 | 0.066693419 | 0.151398452  | 1.151398452  |
| 1429772_at   | Pfna2           | pflxin A2                                                                  | 0.01233122 | 0.174314    | 0.1950314    | 1.27465191   |
| 1433495_at   | GLT25D1         | GLYCOSYLTRANSFERASE 25 DOMAIN CONTAINING 1                                 | 0.01240157 | 0.5386101   | 0.5755797    | 0.773519431  |
| 1439757_at   | EphA4           | Eph receptor A4                                                            | 0.01242375 | 0.0985708   | 0.6950996    | 0.728687609  |
| 1450788_at   | SAA1            | SERUM AMYLOID A 1                                                          | 0.01242508 | 0.9436224   | 0.539847     | 2.70002197   |
| 1443075_at   | ---             | ---                                                                        | 0.01249197 | 1.237146-08 | 0.3303045    | 1.137925324  |
| 1421604_at   | Ki67            | Ki67-like factor 3 (basic)                                                 | 0.01252311 | 0.04339326  | 0.6950996    | 0.728687609  |
| 1453424_at   | Fyvol           | FYVE and coiled-coil domain containing 1                                   | 0.01254979 | 0.00239498  | 0.417057     | 0.808553393  |
| 1418092_x_at | TRF10           | TRIFLAVIN HOMONE RECEPTOR INTERACTOR 10                                    | 0.01256603 | 0.1361371   | 0.4195562    | 1.389709239  |
| 1419315_at   | ICRFP3B161405.5 | ICRFP3B161405.5 GENE                                                       | 0.01259014 | 0.05099662  | 0.356978     | 2.451834829  |
| 1418754_at   | ADCY8           | ADENYLYLATE CYCLASE 8                                                      | 0.01259883 | 0.5658471   | 0.7291411    | 1.425502206  |
| 1441267_at   | RSRC1           | ARGININE/SERINE-RICH COILED-COIL 1                                         | 0.01265857 | 0.01500432  | 0.44024      | 0.587086095  |
| 1444341_at   | 8030451F13RK    | RIKEN CDNA 8030451F13 GENE                                                 | 0.0126806  | 0.1027779   | 0.4203061    | 0.68686967   |
| 1424208_at   | PTGRL4          | PROSTAGLANDIN E RECEPTOR 4 (SUBTYPE 4)                                     | 0.01269693 | 0.4603968   | 0.3178257    | 1.59380638   |
| 1442308_at   | SMYD4           | SET AND MYND DOMAIN CONTAINING 4                                           | 0.01271032 | 0.9838952   | 0.4187257    | 0.788026174  |
| 1439189_at   | D630023B12RK    | RIKEN CDNA D630023B12 GENE                                                 | 0.01271178 | 0.0995241   | 0.7099966    | 0.810666628  |
| 1446791_at   | ---             | ---                                                                        | 0.01271989 | 0.064215441 | 0.786155577  | 0.6468491    |
| 1446748_at   | 2010007H06 GENE | RIKEN CDNA 2010007H06 GENE                                                 | 0.01275959 | 0.7765871   | 0.3346684    | 2.30645616   |
| 1434087_at   | MTHFR           | 5,10-METHYLENTETRAHYDROFOLATE REDUCTASE                                    | 0.01278597 | 0.3675277   | 0.6658009    | 0.83748331   |
| 1419205_at   | HTFPC           | HTF PIV TINY FRAGMENTATION LOCUS 9C                                        | 0.01281733 | 0.1411713   | 0.1734476    | 0.73243352   |
| 1435634_at   | Pfcm11          | protein-L-isopartate (D-aspartate) O-methyltransferase domain containing 1 | 0.01280421 | 0.0449151   | 0.5910635    | 0.794608823  |
| 1419194_x_at | GMPG            | GLIA MATURATION FACTOR, GAMMA                                              | 0.01280897 | 0.7684855   | 0.3353537    | 0.721153896  |
| 1429085_at   | VEZF1           | VASCULAR ENDOTHELIAL ZINC FINGER 1                                         | 0.01285012 | 0.5059662   | 0.338813     | 0.755679739  |
| 1417783_at   | Als2            | amyotrophic lateral sclerosis 2 (gavene1) homolog (human)                  | 0.01294882 | 0.1771731   | 0.881201     | 0.789773508  |
| 1421929_at   | EphA4           | Eph receptor A4                                                            | 0.01303247 | 3.52601E-05 | 0.3479267    | 1.190462293  |
| 1420183_at   | Lam             | Lamin                                                                      | 0.01303683 | 0.84405984  | 0.6497272424 | 0.6497272424 |
| 1446374_at   | ARHGFE10        | RHO GUANINE NUCLEOTIDE EXCHANGE FACTOR (GEF) 10                            | 0.01307983 | 0.0303855   | 0.0527030    | 0.849646985  |
| 1438765_at   | Dlx33           | DLX3 (Asp-Glu-Ala-His) box polyprotein 33                                  | 0.01308264 | 0.0883874   | 0.0772348    | 0.711516743  |
| 1452593_at   | SNX19           | RIKEN CDNA 352401K01 GENE                                                  | 0.01312444 | 0.3840151   | 0.8171527    | 0.59380638   |
| 1424859_at   | HOMER3          | HOMER HOMOLOG 3 (DIROSOPHILA)                                              | 0.01316961 | 0.00899007  | 0.66730009   | 0.824553025  |
| 1436045_x_at | STIM1           | STROMAL INTERACTION MOLECULE 1                                             | 0.01317349 | 0.01429928  | 0.6132626    | 0.712113158  |
| 1430369_at   | EphA1           | Eph receptor A1                                                            | 0.01321629 | 0.7697523   | 0.2981724    | 1.474306325  |
| 1440271_at   | ---             | Transcribed locus                                                          | 0.01326244 | 0.0641831   | 0.0774537    | 1.206990931  |
| 1457030_at   | MIRG            | MIRNA CONTAINING GENE                                                      | 0.01329095 | 0.7859758   | 0.3299725    | 1.23057394   |
| 1455644_at   | MAPP3K9         | MIRNA-ACTIVATED PROTEIN KINASE KINASE 9                                    | 0.01331831 | 0.33378     | 0.238622873  | 0.238622873  |
| 1435880_at   | ANKRD50         | ANKYRIN REPEAT DOMAIN 50                                                   | 0.01336553 | 0.6514272   | 0.6897443    | 1.284733654  |
| 1441728_at   | SCN1A           | SODIUM CHANNEL, VOLTAGE-GATED, TYPE I, ALPHA                               | 0.01337888 | 0.9013822   | 0.15         |              |

|              |                |                                                                                        |            |             |             |             |
|--------------|----------------|----------------------------------------------------------------------------------------|------------|-------------|-------------|-------------|
| 1452484_at   | CAR7           | CARBONIC ANHYDRASE 7                                                                   | 0.01431174 | 1.6345E-05  | 0.7514179   | 1.14096883  |
| 1459169_at   | MAPK6          | MITOGEN ACTIVATED PROTEIN KINASE 4                                                     | 0.01431187 | 0.04708881  | 0.1764794   | 1.19240937  |
| 1460321_at   | CNTN4          | AXONAL-ASSOCIATED CELL ADHESION MOLECULE                                               | 0.01431785 | 0.179471    | 0.09829315  | 1.188097283 |
| 1444742_at   | ASB14          | ANKRYRN REPEAT AND SOCS BOX-CONTAINING PROTEIN 14                                      | 0.01434356 | 0.001030666 | 0.6487709   | 0.484564309 |
| 1422755_at   | CD84           | CD84 ANTIGEN                                                                           | 0.01439118 | 0.1992265   | 0.13981866  | 0.828186924 |
| 1457446_at   | OPCML          | OPIOD BINDING PROTEIN/CELL ADHESION MOLECULE-LIKE                                      | 0.01444036 | 0.8030494   | 0.4204454   | 1.104101047 |
| 1427344_at   | RASD2          | RASD FAMILY, MEMBER 2                                                                  | 0.01447291 | 0.1717629   | 0.8071305   | 1.34278223  |
| 1424296_at   | PPP2R2C        | PROTEIN PHOSPHATASE 2, REGULATORY SUBUNIT B (B56), GAMMA ISOFORM                       | 0.01447325 | 0.000403757 | 0.5998043   | 0.78076308  |
| 1440116_at   | DR040512R1K    | RKIN CDNA D6040512 GENE                                                                | 0.01448594 | 0.264442    | 0.3893249   | 1.131795313 |
| 1420863_at   | DCTN4          | DYNACTIN 4                                                                             | 0.01448687 | 1.2720E-06  | 0.06585429  | 1.067049891 |
| 1429528_at   | RAE1           | RAE1 RNA EXPORT 1 HOMOLOG (S. POMBE)                                                   | 0.01449422 | 0.000031838 | 0.130666    | 0.72743407  |
| 1441472_x_at | ---            | ---                                                                                    | 0.01449887 | 0.04852794  | 0.2163956   | 0.802258285 |
| 1431096_at   | ---            | ---                                                                                    | 0.01452173 | 0.4639346   | 0.7658116   | 1.214202141 |
| 1451114_at   | UNG2           | URACIL DNA GLYCOSYLASE 2                                                               | 0.01459454 | 0.7170304   | 0.3995528   | 0.730796308 |
| 1423585_at   | ACTBP1         | ATP/GTP BINDING PROTEIN 1                                                              | 0.01462944 | 2.06832E-07 | 0.6307203   | 1.072378078 |
| 1426228_at   | KRAS           | V-KI-RAS2 KIRSTEN RAT SARCOMA VIRAL ONCOGENE HOMOLOG                                   | 0.01463681 | 0.1633777   | 0.1137849   | 0.27714895  |
| 1444857_at   | C83712         | EXPRESSED SEQUENCE C83712                                                              | 0.01469541 | 0.1319629   | 0.2955202   | 0.32698207  |
| 1444730_at   | Nrcx3          | Neurexin III                                                                           | 0.01471879 | 0.0100275   | 0.560898    | 1.753430199 |
| 1440034_at   | Stam2          | signal transducing adaptor molecule (SH3 domain and ITAM motif) 2                      | 0.01473302 | 0.8209325   | 0.3644538   | 1.48668684  |
| 1429943_at   | CTBS           | CHITINASE, DE-N-ACETYL-                                                                | 0.01474353 | 0.00046217  | 0.0735709   | 0.741681334 |
| 1423503_at   | JAM3           | RKIN CDNA 1110002E2 GENE                                                               | 0.01477894 | 0.04578748  | 0.0512059   | 1.16217038  |
| 1416562_at   | Gad1           | glutamic acid decarboxylase 1                                                          | 0.01486335 | 0.002307308 | 0.9763202   | 0.77319249  |
| 1457995_at   | ---            | ---                                                                                    | 0.01489246 | 0.879279    | 0.3091364   | 2.21078839  |
| 1429429_at   | Ptenad1        | protein-L-isoopartate (D-apartate) O-methyltransferase domain containing 1             | 0.01490564 | 0.2384762   | 0.0603377   | 0.820918131 |
| 1425388_at   | TPK1           | THIAMIN PYROPHOSPHOKINASE                                                              | 0.01489723 | 0.8199376   | 0.4403206   | 0.803283868 |
| 1439101_at   | DR0300702R1K   | RKIN CDNA DR0300702 GENE                                                               | 0.01489964 | 0.06077438  | 0.2661805   | 0.607030132 |
| 1417878_at   | E2F1           | E2F TRANSCRIPTION FACTOR 1                                                             | 0.01490231 | 0.1685346   | 0.2004586   | 1.650828737 |
| 1456967_at   | TRIM66         | KIAA0298 HYPOTHETICAL PROTEIN (HUMAN)                                                  | 0.01492154 | 0.1807018   | 0.339114    | 1.346434297 |
| 1431749_x_at | Ragap1         | RA5 guanyl releasing protein 1                                                         | 0.01492451 | 6.48451E-05 | 0.8605856   | 1.241384893 |
| 1456166_at   | Cmp1           | Cyprin-like                                                                            | 0.01495803 | 0.19546377  | 0.3762566   | 0.272980699 |
| 1421595_at   | 9630031F12R1K  | RKIN CDNA 9630031F12 GENE                                                              | 0.01497003 | 0.02158468  | 0.0735401   | 0.80373569  |
| 1423218_at   | RAD18          | RAD18 HOMOLOG (S. CEREVISIAE)                                                          | 0.01501785 | 0.0414371   | 0.6917924   | 0.540957312 |
| 1454212_at   | 49304509R1K    | RKIN CDNA 49304509 GENE                                                                | 0.01503881 | 0.5730356   | 0.1339813   | 0.584838656 |
| 1457166_at   | AA536749       | EXPRESSED SEQUENCE AA536749                                                            | 0.01504068 | 0.0023649   | 0.0864146   | 1.315544385 |
| 1452117_at   | FYB            | FYB BINDING PROTEIN                                                                    | 0.01504985 | 0.0760122   | 0.3289472   | 1.448382732 |
| 1457615_at   | ---            | ---                                                                                    | 0.01506807 | 0.8268608   | 0.9275171   | 0.541770103 |
| 1446609_at   | Albin3         | Actin binding LIM protein family, member 3                                             | 0.0151077  | 0.0401133   | 0.0583161   | 0.686019183 |
| 1453250_at   | 4921511C04R1K  | RKIN CDNA 4921511C04 GENE                                                              | 0.0151112  | 0.7075807   | 0.796177    | 0.431458103 |
| 1442581_at   | KSR1           | KINASE SUPPRESSOR OF RAS 1                                                             | 0.01512604 | 0.1347556   | 0.1570192   | 0.818979994 |
| 1454593_at   | SYN1           | SYNAPTOBULBIN-1/CLYXOPE 1                                                              | 0.01512662 | 0.6339084   | 1.261484241 | 0.6190866   |
| 1426934_at   | NHSL1          | NHSL-LIKE 1                                                                            | 0.01519089 | 0.00812816  | 0.6323646   | 0.697033257 |
| 1443359_at   | ODZ4           | ODD OZ/TEN-5 HOMOLOG 4 (DROSOPHILA)                                                    | 0.01524488 | 0.07037986  | 0.1410952   | 1.449165718 |
| 1423740_at   | SMYD2          | RKIN CDNA 1110002E2 GENE                                                               | 0.01527200 | 0.1856611   | 0.0728279   | 1.222787877 |
| 1441735_at   | LRG1           | LEUCINE-RICH REPEATS AND IMMUNOGLOBULIN-LIKE DOMAINS 1                                 | 0.01528303 | 0.9164515   | 0.5899939   | 1.799015497 |
| 1424035_at   | Chrm5          | cholinergic receptor, nicotinic, alpha polypeptide 5                                   | 0.01530184 | 0.4003324   | 0.5980455   | 0.736297259 |
| 1452777_at   | 63304012F12R1K | RKIN CDNA 63304012F12 GENE                                                             | 0.01530777 | 0.1613927   | 0.3316784   | 1.083078713 |
| 1434321_at   | 6620401K05R1K  | RKIN CDNA 6620401K05 GENE                                                              | 0.01531368 | 0.196225    | 0.0582521   | 1.216024306 |
| 1426832_at   | 6330405F04R1K  | RKIN CDNA 6330405F04 GENE                                                              | 0.01538948 | 0.0146948   | 0.802342    | 0.784711998 |
| 1456949_at   | RKIC2          | PHOSPHATIDYLINOSITOL 3-KINASE, CATALYTIC, BETA POLYPEPTIDE                             | 0.01539738 | 0.066825308 | 0.8022562   | 1.191702899 |
| 1445217_at   | A730073F16R1K  | RKIN CDNA A730073F16 GENE                                                              | 0.01541555 | 0.0176697   | 0.2043241   | 0.600757575 |
| 1440277_at   | AL0041474      | EXPRESSED SEQUENCE AL0041474                                                           | 0.01543996 | 0.0340467   | 0.1449159   | 0.842885074 |
| 1446206_at   | TDRD5          | TDRD DOMAIN CONTAINING 5                                                               | 0.01548804 | 0.2085974   | 0.545700842 | 0.6194842   |
| 1449978_x_at | Cncl           | cyclin J-like                                                                          | 0.01550218 | 0.5748562   | 0.9105308   | 0.75240145  |
| 1440932_at   | TRIM17         | TRIPARTITE MOTIF PROTEIN 17                                                            | 0.01552962 | 0.9372151   | 0.4004027   | 0.777947833 |
| 1423111_at   | 4930452D17R1K  | RKIN CDNA 4930452D17 GENE                                                              | 0.01554567 | 0.04333607  | 0.769665532 | 0.646578028 |
| 1416136_at   | SLC27A2        | SOLUTE CARRIER FAMILY 27 (FATTY ACID TRANSPORTER), MEMBER 2                            | 0.01556671 | 0.2449473   | 0.1123171   | 0.473647753 |
| 1419966_at   | TUBB2B         | TUBULIN, BETA 2B                                                                       | 0.01562189 | 0.2328009   | 0.09628279  | 1.603817284 |
| 1441178_at   | DTXD2          | DTXD DOMAIN CONTAINING 2                                                               | 0.01564788 | 0.31819682  | 0.3918324   | 0.603053054 |
| 1454075_at   | NUD1F1         | NUDX (NUCLEOSIDE DIPHOSPHATE LINKED MOEITY X)-TYPE MOTIF 13                            | 0.01568349 | 0.3676165   | 0.1642058   | 0.848414477 |
| 1427946_x_at | DPYD           | DIHYDROPYRIMIDINE DEHYDROGENASE                                                        | 0.01572054 | 0.9152999   | 0.408219    | 0.817879648 |
| 1426983_at   | CNO176         | CCR4-NOT TRANSCRIPTION COMPLEX, SUBUNIT 6                                              | 0.01575219 | 0.8796225   | 0.4228852   | 1.138945437 |
| 1421094_at   | ZNF16          | ZINC FINGER AND FIBRIN DOMAIN CONTAINING 13                                            | 0.01579898 | 0.0151471   | 0.0728279   | 1.402752884 |
| 1451793_at   | TPPI           | TISSUE FACTOR PATHWAY INHIBITOR                                                        | 0.01579318 | 0.0578822   | 0.3250552   | 0.829542009 |
| 1410383_at   | syndecan 2     | adomatosis protein coxsii down-regulated 1                                             | 0.01579922 | 0.001695823 | 0.1092744   | 0.70716455  |
| 1417011_at   | Sema2          | Sema domain, immunoglobulin domain (GG), short basic domain, secreted, (SEMAPHORIN 3A) | 0.0158007  | 0.00218757  | 0.0654159   | 1.447931619 |
| 1420416_at   | SEMA3A         | SEMA DOMAIN, IMMUNOGLOBULIN DOMAIN (GG), SHORT BASIC DOMAIN, SECRETED, (SEMAPHORIN 3A) | 0.01582739 | 0.000811971 | 0.3420789   | 1.201629872 |
| 1431615_at   | TMEM117        | TRANSMEMBRANE PROTEIN 117                                                              | 0.01583049 | 0.3832041   | 0.1792634   | 0.644272715 |
| 1450193_at   | RKX1           | RYR-RELATED KINETIN-ACTIVATED, CYCLIC NUCLEOTIDE-GATED K+ 1                            | 0.01583642 | 0.00317397  | 0.684801    | 1.107466274 |
| 1453287_at   | 573057B15R1K   | RKIN CDNA 573057B15 GENE                                                               | 0.01588959 | 0.05821053  | 0.2038449   | 1.187563163 |
| 1434098_at   | GLRA2          | GLYCINE RECEPTOR, ALPHA 2 SUBUNIT                                                      | 0.01592045 | 0.1470627   | 0.1828674   | 0.730751688 |
| 1426223_at   | 210419102R1K   | RKIN CDNA 210419102 GENE                                                               | 0.01594669 | 0.2372752   | 0.614329    | 0.708280557 |
| 1459906_at   | Dgk8           | Diacylglycerol kinase, eta                                                             | 0.01603166 | 0.5078008   | 0.2866179   | 0.730719341 |
| 1421973_at   | Gria1          | glial cell line derived neurotrophic factor family receptor alpha 1                    | 0.01605719 | 0.263157    | 0.1780897   | 0.682118704 |
| 1429011_at   | SNRP70         | 70 S SMALL NUCLEAR RIBONUCLEOPROTEIN POLYPEPTIDE A                                     | 0.01606241 | 0.182808    | 0.363166    | 0.750610118 |
| 1454666_at   | KID            | Kruppel factor 3 (basic)                                                               | 0.01609457 | 0.9540296   | 0.813613    | 0.759610118 |
| 1459746_at   | R3hdml1        | R3H domain 1 (binds single-stranded nucleic acids)                                     | 0.01613615 | 0.000554198 | 0.3252642   | 1.200664192 |
| 1427526_at   | Epha7          | Eph receptor A7                                                                        | 0.01614762 | 0.000154018 | 0.8980862   | 0.666578028 |
| 1427735_x_at | ACTA1          | ACTIN, ALPHA 1, SKELETAL MUSCLE                                                        | 0.01620608 | 0.01723737  | 0.3619712   | 1.205873983 |
| 1427155_x_at | STSS1AS        | SHALYTRANSFERASE 8 (ALPHA-2, S-SALYTRANSFERASE) E                                      | 0.01620855 | 0.0954948   | 0.2621539   | 1.151557479 |
| 1460591_at   | ESR1           | ESTROGEN RECEPTOR 1 (ALPHA)                                                            | 0.01622409 | 0.192405    | 0.0923403   | 0.662315354 |
| 1430733_at   | 4932441P12R1K  | RKIN CDNA 4932441P12 GENE                                                              | 0.01627777 | 0.2094016   | 0.6979604   | 0.540991604 |
| 1452344_at   | Synj2          | synapjanin 2                                                                           | 0.01632672 | 0.7451598   | 0.3027498   | 1.235917178 |
| 1438815_at   | HIST2AA1       | HISTONE 2, 2AA1A                                                                       | 0.01635555 | 0.03917298  | 0.9232403   | 0.728727282 |
| 1453407_at   | 1700018L24R1K  | RKIN CDNA 1700018L24 GENE                                                              | 0.01644994 | 0.01418599  | 0.2029402   | 0.740170171 |
| 1430353_at   | GLIS3          | GLIS FAMILY ZINC FINGER 3                                                              | 0.01645526 | 0.7419447   | 0.7248987   | 0.678262779 |
| 1415861_at   | TYRP1          | TYROSINASE-RELATED PROTEIN 1                                                           | 0.01646533 | 0.2727063   | 0.7099485   | 0.597193976 |
| 1440077_at   | 6330490D2R1K   | RKIN CDNA 6330490D2 GENE                                                               | 0.01647839 | 0.2924998   | 0.633600979 | 0.63049207  |
| 1424249_at   | SLC6A2         | SOLUTE CARRIER FAMILY 6 (NEUROTRANSMITTER TRANSPORTER, NORADRENALIN, MEMBER 2)         | 0.01650081 | 0.4121415   | 0.9381406   | 0.597193976 |
| 1447112_x_at | CRYL1          | CRYSTALLIN, LAMDA 1                                                                    | 0.01662036 | 0.721475    | 0.1156236   | 0.717282717 |
| 1458839_at   | Cd6b           | calbindin-D28k                                                                         | 0.01663489 | 0.01524355  | 0.040462454 | 0.6194842   |
| 1430045_at   | Tnax           | translin-associated factor X                                                           | 0.01662183 | 0.2599799   | 0.9574008   | 1.506232366 |
| 1430416_at   | ZNR2           | ZINC AND RING FINGER 2                                                                 | 0.01662336 | 0.00299084  | 0.1101133   | 0.823638588 |
| 1429296_at   | 913040119R1K   | RKIN CDNA 913040119 GENE                                                               | 0.01666489 | 0.5601591   | 0.7510361   | 1.774662698 |
| 1453126_at   | LRFN2          | LEUCINE RICH REPEAT AND FIBRONECTIN TYPE III DOMAIN CONTAINING 2                       | 0.01668157 | 0.996656    | 0.2912194   | 1.237670691 |
| 1429327_at   | USP29          | UBQUITIN SPECIFIC PEPTIDASE 29                                                         | 0.01672061 | 0.003150871 | 0.3626081   | 1.297525248 |
| 1450083_at   | A113524        | EXPRESSED SEQUENCE A113524                                                             | 0.01676167 | 0.002832808 | 0.0874029   | 1.121478029 |
| 1452983_at   | CEP57          | RKIN CDNA 4921511C04 GENE                                                              | 0.01676979 | 0.0132504   | 0.5781276   | 0.785004514 |
| 1436450_at   | ---            | ---                                                                                    | 0.01683888 | 0.3467999   | 0.3444766   | 1.115395222 |
| 1427496_x_at | Spag5          | spem associated antigen 5                                                              | 0.01691875 | 0.4778448   | 0.6054736   | 1.603472369 |
| 1431380_at   | 5730409L17R1K  | RKIN CDNA 5730409L17 GENE                                                              | 0.01697102 | 0.0765586   | 0.256042    | 1.402907518 |
| 1418600_at   | MAPK7          | MITOGEN ACTIVATED PROTEIN KINASE 7                                                     | 0.01707227 | 0.0714782   | 0.578978    | 0.599941402 |
| 1451544_at   | GNAI7          | GNAI7 MOLECULE 47, (NON)BIOPHILIN                                                      | 0.01709404 | 0.626338    | 0.187501083 | 0.87501083  |
| 1430106_at   | 1700126L10R1K  | RKIN CDNA 1700126L10 GENE                                                              | 0.0171548  | 0.1889752   | 0.6087901   | 1.964073747 |
| 1434754_at   | GARNA4         | GTPASE ACTIVATING RANGAP DOMAIN-LIKE 4                                                 | 0.01716358 | 0.6522329   | 0.1750043   | 0.773372318 |
| 1427609_at   | Hhcx2b         | Hedgehog protein 2b                                                                    | 0.01716929 | 0.03857524  | 0.2121865   | 1.150391735 |
| 1451355_at   | ASAH1L         | RKIN CDNA 241011605 GENE                                                               | 0.0171984  | 0.003413011 | 0.2571287   | 0.86020449  |
| 1438105_at   | LOC62687       | HYPOTHETICAL PROTEIN LOC62686                                                          | 0.0174267  | 0.722355    | 0.1750495   | 0.748504474 |
| 1427439_at   | PRMT5          | PROTEIN ARGININE-S-METHYLTRANSFERASE 5                                                 | 0.01731837 | 0.9501491   | 0.2270821   | 1.116600564 |
| 1441628_at   | DIAP3          | DIAPHANOUS HOMOLOG 3 (DROSOPHILA)                                                      | 0.0173423  | 0.002730623 | 0.5877269   | 0.405666015 |
| 1416561_at   | Gad1           | glutamic acid decarboxylase 1                                                          | 0.01733459 | 0.3499238   | 0.3340359   | 0.761336232 |
| 1447101_at   | RNF122         | RING FINGER PROTEIN 122                                                                | 0.01734843 | 0.000495335 | 0.2096847   | 0.575800521 |
| 1431109_at   | SLC49A0M13R1K  | RKIN CDNA 5430004G1 GENE                                                               | 0.01737874 | 0.3307901   | 0.618139419 | 1.181394139 |
| 1421225_at   | Ap3a2          | adaptor-related protein complex 3, mu 2 subunit                                        | 0.01739489 | 0.4860998   | 0.800546    | 0.444323259 |
| 1417343_at   | FXYD6          | FXYD DOMAIN CONTAINING ION TRANSPORT REGULATOR 6                                       | 0.0174097  | 0.1068963   | 0.1809908   | 2.09158443  |
| 1454785_at   | DRBP11         | DIAL SYMBIOTIC PHOSPHATASE 11 (RNA-RNP COMPLEX 1-INTERACTING)                          | 0.01743406 | 0.001798407 | 0.0827133   | 0.735232855 |
| 1440838_at   | ALS2264        | EXPRESSED SEQUENCE ALS2264                                                             | 0.01743422 | 0.2569977   | 0.807891    | 1.261429059 |
| 1424519_at   | MTG1           | MITOCHONDRIAL GPASE 1 HOMOLOG (S. CEREVISIAE)                                          | 0.01744866 | 0.2151717   | 0.4848991   | 0.8007185   |
| 1423290_at   | Epha7          | Eph receptor A7                                                                        | 0.01745089 | 0.6232407</ |             |             |

|           |                |                                                                                               |            |             |             |             |
|-----------|----------------|-----------------------------------------------------------------------------------------------|------------|-------------|-------------|-------------|
| 142859_u  | PAOX           | POLYAMINE OXIDASE (EXO-N4-AMINO)                                                              | 0.01823749 | 0.08577803  | 0.6878419   | 0.73758119  |
| 142101_u  | L6b2           | L10 domain binding 2                                                                          | 0.01823749 | 0.290424    | 0.242712    | 1.133206454 |
| 1454030_u | SAPS3          | SAPS DOMAIN MEMBER 3                                                                          | 0.01827146 | 0.0170514   | 0.4599935   | 1.17175756  |
| 1419167_u | PRAP1          | PROLINE-RICH ACIDIC PROTEIN 1                                                                 | 0.01828251 | 0.2227828   | 0.0672343   | 0.7481639   |
| 1419994_u | ---            | ---                                                                                           | 0.01828259 | 0.3089617   | 0.4690964   | 0.777929035 |
| 1414660_u | EIF3S10        | ---                                                                                           | 0.01829943 | 1.248986-06 | 0.07427238  | 1.05691321  |
| 1458186_u | ---            | ---                                                                                           | 0.01831199 | 0.7878885   | 0.3793665   | 0.85304608  |
| 1421457_u | SAMSN1         | SAM DOMAIN, SH3 DOMAIN AND NUCLEAR LOCALIZATION SIGNALS, 1                                    | 0.01834855 | 0.104854    | 0.0122529   | 0.78783046  |
| 1457935_u | TS122          | SEROLOGICALLY DEFINED COLON CANCER-LIKE 3 LIKE                                                | 0.01838124 | 0.16578209  | 0.2995518   | 0.425012886 |
| 1456482_u | PK3R3          | PHOSPHATIDYLINOSITOL 3 KINASE, REGULATORY SUBUNIT, POLYPEPTIDE 3 (P55)                        | 0.01842876 | 0.00012386  | 0.1293815   | 1.082325465 |
| 1443589_u | ---            | ---                                                                                           | 0.01844252 | 0.00069431  | 0.284183    | 1.18981165  |
| 1416600_u | TF1c           | PEPTIDYL LEUCYL ISOMERASE F (CYCLOPHILIN F)                                                   | 0.01847919 | 0.04216518  | 0.709292    | 0.855282412 |
| 1439764_u | C330012H03RIK  | RIKEN CDNA C330012H03 GENE                                                                    | 0.01849834 | 0.6343072   | 0.563307    | 2.175914309 |
| 1443589_u | DXERTD242E     | DNA SEGMENT, CHR X, ERATO DOJ 242, EXPRESSED                                                  | 0.01850068 | 0.1386918   | 0.4520099   | 1.361778935 |
| 1449020_u | CYP19A1        | CYP19A1 (P450) FAMILY 19, SUBFAMILY A, POLYPEPTIDE 1                                          | 0.01851931 | 0.1053265   | 0.282489    | 0.498696264 |
| 1427748_u | IGK-V1         | IMMUNOGLOBULIN KAPPA CHAIN VARIABLE 1 (V1)                                                    | 0.01851313 | 0.4124349   | 0.3607899   | 0.487628797 |
| 1458180_u | ---            | ---                                                                                           | 0.01854075 | 0.0396164   | 0.7854399   | 1.50092707  |
| 1435655_u | ---            | ---                                                                                           | 0.01855886 | 0.335023    | 0.649089    | 0.848376575 |
| 1440343_u | RPS6A5         | RIBOSOMAL PROTEIN S6 KINASE, POLYPEPTIDE 5                                                    | 0.0185655  | 0.0167605   | 0.122354    | 0.700042526 |
| 1447120_u | BTIC           | BETA-TRANSDUCIN REPEAT CONTAINING PROTEIN                                                     | 0.01858908 | 0.0413628   | 0.2395764   | 1.289778215 |
| 1440340_u | ---            | ---                                                                                           | 0.01864415 | 0.04359851  | 0.6156775   | 0.735021122 |
| 1457229_u | GPR173         | G-PROTEIN COUPLED RECEPTOR 173                                                                | 0.01866779 | 0.0927871   | 0.608574    | 0.789811036 |
| 1454822_u | ApoJ1          | adenomatous polyposis coli down-regulated 1                                                   | 0.01868536 | 0.6066306   | 0.4263041   | 0.609872882 |
| 1451284_u | 111007014H1RIK | RIKEN CDNA 111007014 GENE                                                                     | 0.01874509 | 0.06661608  | 0.420095    | 0.759474669 |
| 1449677_u | TMEM38B        | TRANSMEMBRANE PROTEIN 38B                                                                     | 0.01879477 | 0.1041784   | 0.2259673   | 0.899717731 |
| 1429790_u | KLRK16         | KILLER CELL LECTIN-LIKE RECEPTOR, SUBFAMILY A, MEMBER 16                                      | 0.01879971 | 0.6179097   | 0.897976    | 0.682481258 |
| 1419483_u | IFIP1          | INTERFERON INDUCIBLE GTPASE 1                                                                 | 0.01881709 | 0.8469935   | 0.212837    | 2.211737573 |
| 1440063_u | FARSLA         | PHENYLALANINE-TRNA SYNTHETASE-LIKE, ALPHA SUBUNIT                                             | 0.0189026  | 0.0887275   | 0.652925    | 2.33646548  |
| 1460490_u | MRP15          | MITOCHONDRIAL RIBOSOMAL PROTEIN L15                                                           | 0.01892049 | 0.4448971   | 0.1667158   | 0.811654731 |
| 1427194_u | KLR3C          | KILLER CELL LECTIN-LIKE RECEPTOR SUBFAMILY C, MEMBER 3                                        | 0.01893388 | 0.3952305   | 0.18182     | 2.64523814  |
| 1448469_u | ND1            | ND1                                                                                           | 0.01897389 | 0.00025497  | 0.3306007   | 0.775862122 |
| 1429712_u | LOC262308      | ETHANOL INDUCED 1                                                                             | 0.01898373 | 0.0395378   | 0.2526786   | 1.144462568 |
| 1450949_u | KAT5A1         | KAT5/NIN PRO1 (ATPASE CONTAINING) SUBUNIT A1                                                  | 0.01899484 | 0.007940052 | 0.2607995   | 1.286554328 |
| 1433300_u | Z900004RIK     | RIKEN CDNA Z900004 GENE                                                                       | 0.01899889 | 0.1059774   | 0.80099792  | 0.643110827 |
| 1430710_u | ---            | ---                                                                                           | 0.01906339 | 0.7204962   | 0.1534982   | 1.203090972 |
| 1415144_u | CN3M3          | heparan sulfate 6-O-sulfotransferase 2                                                        | 0.01909249 | 0.7908552   | 0.22900254  | 1.22900254  |
| 1450047_u | H662           | GUANINE NUCLEOTIDE BINDING PROTEIN (G PROTEIN), BETA POLYPEPTIDE 2 LIKE 1                     | 0.01909661 | 0.0041812   | 0.4230385   | 0.809058331 |
| 1440120_u | GNB2L1         | ---                                                                                           | 0.01910397 | 0.7949096   | 0.2607881   | 1.52664206  |
| 1424004_u | AW56556        | EXPRESSED SEQUENCE AW56556                                                                    | 0.01914166 | 0.455427    | 0.551144092 | 0.8949898   |
| 1425236_u | Neucl1         | neural cell adhesion molecule 1                                                               | 0.0191584  | 0.1579441   | 0.1656367   | 1.13346274  |
| 1424161_u | DDX27          | DEAD (ASP-GLU-ALA-ASP) BOX POLYPEPTIDE 27                                                     | 0.01917082 | 0.6418098   | 0.758766    | 2.14906414  |
| 1412194_u | SPEER7-PS1     | SPERMATOGENESIS ASSOCIATED GLUTAMATE (E)-RICH PROTEIN 7, PSEUDOGENE 1                         | 0.01919322 | 0.5104626   | 0.84391289  | 0.84391289  |
| 1445870_u | C13C2P2        | RIKEN CDNA 111008006 GENE                                                                     | 0.01919754 | 0.000217458 | 0.3470676   | 1.10213786  |
| 1447204_u | Mpkl5          | Mitogen-activated protein kinase kinase kinase 5                                              | 0.01930691 | 0.0015247   | 0.9008677   | 1.30949193  |
| 1437573_u | PR2            | PROPHOSPHATASE (INORGANIC) 2                                                                  | 0.01932159 | 0.2885072   | 0.668280545 | 0.668280545 |
| 1433141_u | 4921504P05RIK  | RIKEN CDNA 4921504P05 GENE                                                                    | 0.01932803 | 0.3311669   | 0.5608005   | 0.758480169 |
| 1439673_u | E230008015RIK  | RIKEN CDNA E230008015 GENE                                                                    | 0.01933061 | 0.02407488  | 0.823973236 | 0.823973236 |
| 1419990_u | ---            | ---                                                                                           | 0.01933507 | 0.1237443   | 0.5030212   | 1.163579991 |
| 1415909_u | ST1P1          | STRESS-INDUCED PHOSPHOPROTEIN 1                                                               | 0.01939674 | 0.3226089   | 0.64624     | 0.672512314 |
| 1421481_u | TNFRSF9        | TUMOR NECROSIS FACTOR RECEPTOR SUPERFAMILY, MEMBER 9                                          | 0.01941053 | 0.001864993 | 0.094654993 | 1.59062958  |
| 1457992_u | ---            | ---                                                                                           | 0.0194528  | 0.4267932   | 0.7921742   | 0.66528542  |
| 1445855_u | AO3000717RIK   | RIKEN CDNA AO3000717 GENE                                                                     | 0.01945848 | 0.0127694   | 0.07313051  | 1.196974912 |
| 1440751_u | EP400          | E1A BINDING PROTEIN P400                                                                      | 0.01949411 | 0.2072425   | 0.5435446   | 0.874107369 |
| 1435874_u | ---            | ---                                                                                           | 0.01950576 | 0.2295646   | 0.3201689   | 1.37272354  |
| 1447123_u | ---            | ---                                                                                           | 0.01950853 | 0.00737862  | 0.1922667   | 1.13489149  |
| 1423785_u | A445040        | expressed sequence A445040                                                                    | 0.01952023 | 0.1468881   | 0.094654993 | 0.710371037 |
| 1425211_u | CEP27          | CENTROSOMAL PROTEIN 27                                                                        | 0.01952386 | 0.6794484   | 0.3701077   | 1.16809993  |
| 1430849_u | CORGF1         | CELL GROWTH REGULATOR WITH RING FINGER DOMAIN 1                                               | 0.01956242 | 0.1818337   | 0.2217677   | 0.818648388 |
| 1455095_u | H1S1212BE      | SYMBOL TO HISTONE H2B-616                                                                     | 0.0195808  | 0.8522606   | 0.3999993   | 1.60741738  |
| 1431433_u | SRF2           | MYOTUBULARIN RELATED PROTEIN 13                                                               | 0.01958731 | 0.641246-05 | 0.7905294   | 0.80103885  |
| 1428748_u | CS8428123RIK   | CNA SEQUENCE BC025757                                                                         | 0.01961413 | 0.0947632   | 0.05176088  | 0.456400812 |
| 1433113_u | 4921504P20RIK  | RIKEN CDNA 4921504P20 GENE                                                                    | 0.0196385  | 0.3146257   | 0.601024    | 1.44358394  |
| 1445062_u | ELOW16         | ELOW FAMILY MEMBER 6, ELONGATION OF LONG CHAIN FATTY ACIDS (YEAST)                            | 0.0196774  | 0.0786452   | 0.4961774   | 0.787037594 |
| 1427225_u | ---            | ---                                                                                           | 0.01968582 | 0.2344514   | 0.1783657   | 0.7451115   |
| 1449141_u | FLB1M1         | FILAMIN BINDING LIM PROTEIN 1                                                                 | 0.01972372 | 0.625996    | 0.1084929   | 1.32026347  |
| 1429760_u | RPS6A6         | RIBOSOMAL PROTEIN S6 KINASE POLYPEPTIDE 6                                                     | 0.01977107 | 0.00083283  | 0.58411     | 0.82444999  |
| 1440848_u | ---            | ---                                                                                           | 0.0197868  | 0.8771729   | 0.7873208   | 0.633701121 |
| 1460570_u | PGBD5          | PIGGYBAC TRANSPOSABLE ELEMENT DERIVED 5                                                       | 0.01979807 | 0.1013621   | 0.9422745   | 0.82177631  |
| 1458731_u | ---            | ---                                                                                           | 0.01983932 | 0.0243878   | 0.4998844   | 0.901414289 |
| 1460105_u | BGALNT2        | UDP-GALNAC-BETA(1-6) GALACTOSAMINYLTRANSFERASE, POLYPEPTIDE 2                                 | 0.01986148 | 0.3389674   | 0.6822635   | 2.971798596 |
| 1439799_u | ZCC1C2         | ZINC FINGER, C2CH DOMAIN CONTAINING 2                                                         | 0.01992923 | 0.4409319   | 0.0689786   | 1.528108427 |
| 1428276_u | 1110065107RIK  | RIKEN CDNA 1110065107 GENE                                                                    | 0.01994417 | 0.7405248   | 0.7834217   | 0.874327594 |
| 1439543_u | 1110064423RIK  | RIKEN CDNA 1110064423 GENE                                                                    | 0.01996891 | 0.5982409   | 0.5294927   | 0.5294927   |
| 1423401_u | ETV6           | ETS VARIANT GENE (A TEL ONCOGENE)                                                             | 0.01999499 | 0.0272672   | 0.08721028  | 0.81140779  |
| 1433122_u | Igf5           | insulin-like growth factor 5                                                                  | 0.02001037 | 0.0121489   | 0.5087962   | 0.508796169 |
| 1432131_u | ---            | ---                                                                                           | 0.02004442 | 0.4089222   | 0.26591     | 0.79267002  |
| 1458606_u | ---            | ---                                                                                           | 0.02008465 | 0.1944433   | 0.05990091  | 1.939198185 |
| 1437052_u | SC2A3          | sialate carrier family 2 (sialinated glucose transporter) member 3                            | 0.02008814 | 0.1262378   | 0.8201016   | 0.820101547 |
| 1423353_u | CRISPLD1       | CYSTEINE-RICH SECRETORY PROTEIN LCC1 DOMAIN CONTAINING 1                                      | 0.02010196 | 0.145471    | 0.372132    | 1.17911986  |
| 1430073_u | 1430073RIK     | RIKEN CDNA 290014801 GENE                                                                     | 0.02015798 | 0.6980706   | 0.3492827   | 1.410625949 |
| 1456099_u | D93001703RIK   | RIKEN CDNA D93001703 GENE                                                                     | 0.02016927 | 0.3225094   | 0.7916346   | 0.400303524 |
| 1448478_u | TRF7           | TRF (TATA BINDING PROTEIN-RELATED FACTOR)-PROXIMAL PROTEIN HOMOLOG (DROSOPHILA)               | 0.02020009 | 0.8296767   | 0.0720245   | 0.78663466  |
| 1418131_u | SAMHD1         | SAM DOMAIN AND HHD DOMAIN, 1                                                                  | 0.02020655 | 0.08836287  | 0.9734223   | 0.83263403  |
| 1460073_u | ---            | ---                                                                                           | 0.02020709 | 0.0995552   | 0.1602352   | 0.881428227 |
| 1418493_u | SNCA           | SYNUCLEIN, ALPHA                                                                              | 0.02025004 | 0.0568424   | 0.8488417   | 0.752997744 |
| 1421018_u | 111001818RIK   | RIKEN CDNA 111001818 GENE                                                                     | 0.02031317 | 0.4189331   | 0.223555    | 1.236506121 |
| 1444424_u | 270092106RIK   | RIKEN CDNA 270092106 GENE                                                                     | 0.02036182 | 0.3014489   | 0.3476221   | 0.726270964 |
| 1438577_u | BRK1           | RYTHER LECTIN-1 RECEPTOR-ASSOCIATED KINASE 1                                                  | 0.02041882 | 0.0031187   | 0.829144601 | 0.829144601 |
| 1453017_u | DSER12S85E     | DNA SEGMENT, CHR 5, ERATO DOJ S85, EXPRESSED                                                  | 0.02044003 | 0.141495    | 0.2576573   | 1.160896829 |
| 1449593_u | DI7ERTD191E    | DNA SEGMENT, CHR 17, ERATO DOJ 191, EXPRESSED                                                 | 0.02044096 | 0.4623955   | 0.2771658   | 0.595302777 |
| 1455185_u | PRF16          | PROTEIN F16                                                                                   | 0.02046395 | 0.8009611   | 0.54117     | 0.773488153 |
| 1455373_u | ---            | ---                                                                                           | 0.02047563 | 0.0662018   | 0.2071783   | 1.251599777 |
| 1418831_u | PKP3           | PLAKOPHILIN 3                                                                                 | 0.02047851 | 0.4013533   | 0.05900294  | 0.774933397 |
| 1451624_u | PRO39P02       | PROTEINASE, ORPHAN 2                                                                          | 0.02052352 | 0.1210077   | 0.15586647  | 1.15586647  |
| 1416081_u | FOXO1          | FORKHEAD BOX O1                                                                               | 0.02053078 | 0.342918    | 0.3230763   | 1.16454159  |
| 1443868_u | ATP13A3        | ATPASE TYPE 13A3                                                                              | 0.02057612 | 0.1733088   | 0.2473732   | 0.418884001 |
| 1437248_u | 2700049A03RIK  | RIKEN CDNA 2700049A03 GENE                                                                    | 0.02059352 | 0.5792749   | 1.5543043   | 1.5543043   |
| 1430853_u | 3110045G13RIK  | RIKEN CDNA 3110045G13 GENE                                                                    | 0.02062133 | 0.4445954   | 0.3908144   | 0.527837438 |
| 1416490_u | TME4D          | TRANSMEMBRANE EMP24 METAL TRANSPORT DOMAIN CONTAINING 6                                       | 0.02062987 | 0.8117087   | 0.1494577   | 2.23021577  |
| 1437506_u | ADAMTS5        | A DISINTEGRIN-LIKE AND METALLOPEPTIDASE (REPROLYSIN TYPE) WITH THROMBOSPONDIN TYPE 1 MOTIF, 6 | 0.02066974 | 0.02263268  | 0.1676382   | 1.725191922 |
| 1446347_u | ---            | ---                                                                                           | 0.0206959  | 0.8169594   | 0.0684278   | 1.476778957 |
| 1428618_u | H6c2           | host cell factor 2                                                                            | 0.02070142 | 0.00576026  | 0.7860073   | 0.78232264  |
| 1459129_u | TIC7           | RIKEN CDNA 111003402 GENE                                                                     | 0.02070765 | 0.0703412   | 0.33101     | 0.497678871 |
| 1416287_u | RGS4           | REGULATOR OF G-PROTEIN SIGNALING 4                                                            | 0.02071291 | 0.04330961  | 0.5956269   | 1.24602379  |
| 1454418_u | 5330421C15RIK  | RIKEN CDNA 5330421C15 GENE                                                                    | 0.02071309 | 0.1021767   | 0.569246    | 1.246022171 |
| 1415191_u | Dnaj1          | DnaJ (Hsp40) homolog, subfamily A, member 4                                                   | 0.0207402  | 0.6097783   | 0.1209576   | 1.199871468 |
| 1457388_u | AK5080801RIK   | RIKEN CDNA AK5080801 GENE                                                                     | 0.02074854 | 0.8832785   | 0.9005778   | 2.9251824   |
| 1444337_u | GM761          | GENE MODEL 761, (NCBI)                                                                        | 0.02080457 | 0.3928341   | 0.1376649   | 0.618218897 |
| 1439804_u | 2110015A10RIK  | RIKEN CDNA 2110015A10 GENE                                                                    | 0.02081966 | 0.5754527   | 0.0370088   | 0.804357697 |
| 1431404_u | TBC1D19        | TBC1 DOMAIN FAMILY MEMBER 9                                                                   | 0.02084059 | 0.8508499   | 0.2605223   | 1.210128495 |
| 1         |                |                                                                                               |            |             |             |             |



|              |              |                                                                         |            |             |             |              |
|--------------|--------------|-------------------------------------------------------------------------|------------|-------------|-------------|--------------|
| 1438827_at   | Gls          | Glutaminase                                                             | 0.02224072 | 0.00317981  | 0.1206682   | 1.718841197  |
| 1455876_at   | 270021E23RK  | RIKEN CDNA 270021E23 GENE                                               | 0.02225336 | 0.03165533  | 0.97657377  | 0.780501759  |
| 1456854_at   | NEURL        | NEURALIZED-LIKE HOMOLOG (DROSOPHILA)                                    | 0.02226148 | 0.063980975 | 0.8565982   | 1.186392255  |
| 1462222_at   | 10H1CR2A     | LOSS OF HETEROZYGOSITY 11, CHROMOSOMAL REGION 2, GENE A HOMOLOG (HUMAN) | 0.02229385 | 0.3297865   | 0.05835083  | 1.265492425  |
| 1425282_at   | 311055A05G   | RIKEN CDNA 311055A05 GENE                                               | 0.02229542 | 0.3296668   | 0.3286668   | 1.422323909  |
| 1449502_at   | DAZL         | DELETED IN AZOOSPERMIA-LIKE                                             | 0.02232827 | 0.06698227  | 0.3950868   | 0.751635332  |
| 1444884_at   | PPT1         | PALMITOYL-PROTEIN THIOESTERASE 1                                        | 0.02237307 | 0.8985487   | 0.1099257   | 0.811387333  |
| 1430689_at   | 281006C22RK  | RIKEN CDNA 281006C22 GENE                                               | 0.02244083 | 0.11491304  | 0.3662454   | 0.785153233  |
| 1456236_s_at | COMM10       | COMM DOMAIN CONTAINING 10                                               | 0.02250133 | 0.7622555   | 0.3820854   | 0.77444923   |
| 1448898_at   | CCL9         | CHEMOKINE (C-C MOTIF) LIGAND 9                                          | 0.02252203 | 0.07890362  | 0.6751509   | 0.71731557   |
| 1418173_at   | SRXN4        | SIDEROFLIXIN 4                                                          | 0.02258554 | 0.8635011   | 0.3132847   | 0.785722263  |
| 1442409_at   | DRETT27SE    | DNA SEGMENT, CHR 9, ERATO DOI 278, EXPRESSED                            | 0.02258719 | 0.0852319   | 0.0597624   | 0.511241076  |
| 1458982_at   | ALU014965    | EXPRESSED SEQUENCE ALU014965                                            | 0.02259817 | 0.9776944   | 0.0849601   | 0.542088898  |
| 1425972_at   | QR           | QUAKING                                                                 | 0.0226189  | 0.0110777   | 0.8454564   | 1.118166861  |
| 1422598_at   | 310485I05RK  | RIKEN CDNA 310485I05 GENE                                               | 0.02262067 | 0.1416219   | 0.930335    | 0.900485068  |
| 1441543_at   | EYA3         | EYES ABSENT 3 HOMOLOG (DROSOPHILA)                                      | 0.02264461 | 0.4439303   | 0.8490011   | 1.942865656  |
| 142776_s_at  | FGFR4        | FIBROBLAST GROWTH FACTOR RECEPTOR 4                                     | 0.02264922 | 0.0698676   | 0.1813978   | 1.953778931  |
| 1444815_at   | CR328        | EXPRESSED SEQUENCE CR328                                                | 0.02265485 | 0.3459441   | 0.625735    | 0.668268426  |
| 1440055_at   | AI84810      | EXPRESSED SEQUENCE AI84810                                              | 0.02267211 | 0.01142127  | 0.6053169   | 0.668395679  |
| 1436915_x_at | LAPTM4B      | LYSOSOMAL-ASSOCIATED PROTEIN TRANSMEMBRANE 4B                           | 0.02270925 | 0.00165622  | 0.3413247   | 0.779092335  |
| 1445944_at   | EXOSC1       | EXOSOME COMPONENT 1                                                     | 0.02272361 | 0.8711425   | 0.5714452   | 1.071924608  |
| 1444215_at   | ---          | ---                                                                     | 0.02273092 | 0.9067858   | 0.7353354   | 0.841955972  |
| 1425937_at   | ANKRD39      | RIKEN CDNA 913014A05 GENE                                               | 0.02273233 | 0.6312114   | 0.480561    | 0.789421447  |
| 1420280_x_at | COL9A3       | PROCOLLAGEN, TYPE IX, ALPHA 3                                           | 0.02275887 | 0.0897618   | 0.0981449   | 0.842328375  |
| 1442921_at   | MMP24        | MATRIX METALLOPROTEINASE 24                                             | 0.02279076 | 0.8426051   | 0.5603101   | 2.260946461  |
| 1416204_at   | GpII         | glycosyl 3-phosphatidylglycerol 1 (soluble)                             | 0.02284271 | 0.923845    | 0.7171904   | 1.423793999  |
| 1452435_at   | Wdr22        | WD repeat domain 22                                                     | 0.02289059 | 0.1994407   | 0.2962613   | 1.142869322  |
| 1430190_at   | 1700041C02RK | RIKEN CDNA 1700041C02 GENE                                              | 0.02290126 | 0.9377018   | 0.1116886   | 0.813314459  |
| 1456097_at   | Hg879        | hepatitis B 3 binding protein (hep-3-endonuclease)                      | 0.02292031 | 0.1230741   | 0.1278184   | 0.723657615  |
| 1425206_at   | DNAI1A1      | DNAI (HSP40) HOMOLOG, SUBFAMILY A, MEMBER 1                             | 0.02294261 | 0.4894838   | 0.1193777   | 1.268383374  |
| 1453931_at   | COL14A1      | PROCOLLAGEN, TYPE XIV, ALPHA 1                                          | 0.02294678 | 0.165166    | 0.0732456   | 0.663034626  |
| 1424229_at   | DYRK3        | DUAL-SPECIFICITY TYROSINE-(Y)-PHOSPHORYLATION REGULATED KINASE 3        | 0.02295432 | 0.05560315  | 0.4291123   | 1.139434665  |
| 1424297_s_at | Tam2         | topoisomerase II, alpha                                                 | 0.02301511 | 0.1712955   | 0.620209    | 0.675078274  |
| 1457837_at   | BC033606     | PHOSPHOLIPASE B1                                                        | 0.02302541 | 0.2050943   | 0.2050733   | 0.670317801  |
| 1429447_at   | EVC2         | ELLIS VAN CREVELD SYNDROME 2 HOMOLOG (HUMAN)                            | 0.02303518 | 0.13109578  | 0.312916    | 0.808060717  |
| 1421176_at   | Ragap1       | RAS guanine releasing protein 1                                         | 0.02305664 | 0.41932336  | 0.278676    | 1.921789872  |
| 1427043_x_at | COVA1        | CYTOSOLIC OVARIAN CARCINOMA ANTIGEN 1                                   | 0.02309362 | 0.3625534   | 0.8940571   | 0.719862715  |
| 1416396_at   | SNX4         | SORTING NEXIN 4                                                         | 0.02310423 | 0.00712884  | 0.6117475   | 0.859091561  |
| 1447474_at   | Hs162        | heparan sulfate glycosaminoglycan 3-O-sulfotransferase 2                | 0.02314863 | 0.0780847   | 0.48166882  | 1.48166882   |
| 1418734_at   | BE136769     | EXPRESSED SEQUENCE BE136769                                             | 0.02318554 | 0.36288     | 0.09138047  | 0.434683799  |
| 1448573_x_at | CLACAM10     | CLA-RELATED CELL ADHESION MOLECULE 10                                   | 0.02318391 | 0.3071879   | 0.9486636   | 2.422389811  |
| 1429445_at   | 310109A09RK  | RIKEN CDNA 310109A09 GENE                                               | 0.02324221 | 0.2779794   | 0.5590112   | 1.391498505  |
| 1424243_at   | Per3         | perla homolog 3 (Drosophila)                                            | 0.02323832 | 0.6208494   | 0.1382249   | 1.198025389  |
| 1440126_at   | BC037704     | CDNA SEQUENCE BC037704                                                  | 0.02327787 | 0.5099958   | 0.09954625  | 0.661782977  |
| 1445200_at   | ---          | ---                                                                     | 0.02332221 | 0.1045221   | 0.9225567   | 0.9225567    |
| 1451475_at   | PLXND1       | PLEXIN D1                                                               | 0.02329858 | 0.1585437   | 0.2900665   | 1.24441231   |
| 1437604_x_at | Apcd1        | adenomatous polyposis coli down-regulated 1                             | 0.02331037 | 0.0747052   | 0.3945335   | 0.732092339  |
| 1425421_at   | RBBP6        | RETINOBLASTOMA BINDING PROTEIN 6                                        | 0.02333736 | 0.08920496  | 0.071205566 | 0.771205566  |
| 1416527_at   | RAB32        | RAB32, MEMBER RAS ONCOGENE FAMILY                                       | 0.02336555 | 0.1763344   | 0.641259    | 0.6793904    |
| 1429875_at   | 170004305RK  | RIKEN CDNA 170004305 GENE                                               | 0.02338272 | 0.98607     | 0.1988083   | 0.52413452   |
| 142315_s_at  | ASB1         | ANKRYN REPEAT AND SOCS BOX-CONTAINING PROTEIN 11                        | 0.02340271 | 0.4808853   | 0.727876    | 0.719332366  |
| 1445465_at   | N28178       | expressed sequence N28178                                               | 0.02341082 | 0.2419908   | 0.2442798   | 1.171483737  |
| 1457056_at   | FTCD         | FORMININOTRANSFERASE CYCLODEAMINASE                                     | 0.02341784 | 0.5460602   | 0.2199728   | 2.276276233  |
| 1421518_at   | BC14         | BLASTIC LEUKEMIA 14 PROPHILA 4                                          | 0.02343676 | 0.9901726   | 0.3610721   | 0.780670262  |
| 1429629_at   | ZH1          | ENHANCER OF ZESTE HOMOLOGY 1 (DROSOPHILA)                               | 0.0234422  | 0.2240255   | 0.5619771   | 1.163762252  |
| 1460133_at   | ---          | ---                                                                     | 0.02351299 | 0.6279378   | 0.0930299   | 1.596988241  |
| 1434646_at   | EXOSC8       | EXOSOME COMPONENT 8                                                     | 0.02353798 | 0.4787116   | 0.6487112   | 0.831191658  |
| 1424248_at   | Arpp21       | cyclic AMP-regulated phosphoprotein, 21                                 | 0.02353897 | 0.4991034   | 0.2545575   | 1.255168409  |
| 1430572_at   | 1810042K04RK | RIKEN CDNA 1810042K04 GENE                                              | 0.02359328 | 0.419023    | 0.0746653   | 1.63431729   |
| 1452783_at   | Fdc3b        | fibronectin type III domain containing 3B                               | 0.02359779 | 0.0114288   | 0.331534    | 1.173866229  |
| 1453653_at   | 310103A11RK  | RIKEN CDNA 310103A11 GENE                                               | 0.02360834 | 0.8329707   | 0.8549113   | 0.9718268118 |
| 1450957_s_at | SQSTM1       | SQSTM1                                                                  | 0.02362409 | 0.7320797   | 0.5915405   | 1.066898658  |
| 1426206_at   | FBXO10       | F-box protein 10                                                        | 0.02365614 | 0.1180741   | 0.966805    | 0.75063633   |
| 1448133_at   | NR237        | NR2 REPEAT DOMAIN 27                                                    | 0.02372984 | 0.65329669  | 0.1466239   | 1.901560972  |
| 1431001_at   | 903062A402RK | RIKEN CDNA 2610029J22 GENE                                              | 0.02373336 | 0.8648729   | 0.3615929   | 2.201563634  |
| 1432299_at   | 492151108RK  | RIKEN CDNA 492151108 GENE                                               | 0.02381809 | 0.219229    | 0.0915947   | 0.534626201  |
| 1433357_at   | 3730422I09RK | RIKEN CDNA 3730422I09 GENE                                              | 0.02382327 | 0.5558469   | 0.7903887   | 2.351668242  |
| 1416914_x_at | MTVR2        | MAMMARY TUMOR VIRUS RECEPTOR 2                                          | 0.02382631 | 0.01064205  | 0.5397272   | 1.177509767  |
| 1441300_at   | KCNF1        | POTASSIUM VOLTAGE-GATED CHANNEL, SUBFAMILY F, MEMBER 1                  | 0.02383862 | 0.3071964   | 0.4016422   | 1.544228911  |
| 1417235_at   | SHD3         | SH3-DOMAIN CONTAINING 3                                                 | 0.02384648 | 0.5491969   | 0.9303112   | 0.799857074  |
| 1436537_at   | ZFP629       | ZINC FINGER PROTEIN 629                                                 | 0.02387462 | 0.1613557   | 0.871858    | 0.820209987  |
| 1446994_at   | EXOSC2       | EXOSOME COMPONENT 2                                                     | 0.02387855 | 0.729254    | 0.1748826   | 2.424954811  |
| 1454770_at   | CKKBR        | CHOLECYSTOKININ B RECEPTOR                                              | 0.02390417 | 0.6311711   | 0.1942638   | 1.1942638    |
| 1438565_at   | AK8001M20RK  | EXPRESSED SEQUENCE AK8001M20                                            | 0.02391924 | 0.0003252   | 0.7041547   | 1.12720459   |
| 1425833_x_at | HPC4         | HIPPOCAMPIN                                                             | 0.02392542 | 0.00673859  | 0.5919145   | 1.134646521  |
| 1455856_at   | ---          | ---                                                                     | 0.02392955 | 0.2820789   | 0.6567082   | 0.656707706  |
| 1460233_at   | GUCA2B       | GUANYLATE CYCLASE ACTIVATOR 2B (RETINA)                                 | 0.02400555 | 0.1466555   | 0.9012465   | 0.580640954  |
| 1459768_at   | DLG1B        | DISCS, LARGE HOMOLOG 1 (DROSOPHILA)                                     | 0.02403939 | 0.5611963   | 0.7193547   | 1.205315785  |
| 1418230_at   | LIMS1        | RIKEN CDNA 492151A02 GENE                                               | 0.02404135 | 0.060392312 | 0.060392312 | 1.086826223  |
| 1441848_at   | ---          | ---                                                                     | 0.02413731 | 0.2468342   | 0.9058387   | 1.351796596  |
| 1453772_at   | KIF21B       | KINESIN FAMILY MEMBER 21B                                               | 0.02421936 | 0.3137274   | 0.9689241   | 1.275899154  |
| 1422258_at   | CR3A3        | CHOLESTEROL RECEPTOR, MUSCARINIC 3, CARDIAC                             | 0.02423418 | 0.01607961  | 0.6176129   | 0.753564229  |
| 1444082_at   | A73001C20RK  | RIKEN cDNA A73001C20 GENE                                               | 0.02424407 | 0.7668341   | 0.3192514   | 0.761464677  |
| 1441397_at   | PARD3        | DNA SEGMENT, CHR 8, ERATO DOI 580, EXPRESSED                            | 0.02424967 | 0.193142    | 0.3312718   | 0.731810483  |
| 1448805_at   | KCNH3        | POTASSIUM VOLTAGE-GATED CHANNEL, SUBFAMILY H (EAG-RELATED), MEMBER 3    | 0.02425332 | 0.8952085   | 0.861523    | 1.384713604  |
| 1481133_at   | ---          | ---                                                                     | 0.02438799 | 0.7738149   | 0.5642486   | 0.851308872  |
| 1457054_x_at | DJ1002I05RK  | RIKEN CDNA DJ1002I05 GENE                                               | 0.02440989 | 0.1426742   | 0.620213    | 0.732200674  |
| 1424220_x_at | PORCN        | PORCUPINE HOMOLOG (DROSOPHILA)                                          | 0.02442256 | 0.0670580   | 0.991139    | 0.767286401  |
| 1426850_at   | MARCK6       | MITOGEN-ACTIVATED PROTEIN KINASE 6                                      | 0.02444035 | 0.82997161  | 0.8008245   | 0.800768474  |
| 1446637_at   | PRDM10       | PR DOMAIN CONTAINING 10                                                 | 0.02446423 | 0.5792204   | 0.9457037   | 2.064857025  |
| 1431469_at   | CXNC5        | CXCR FINGER 5                                                           | 0.02446625 | 0.113422    | 0.0881611   | 1.151829902  |
| 1424229_at   | RIN2         | RAS AND RAB1 INTERACTOR 2                                               | 0.02446646 | 0.0475173   | 0.9303112   | 1.995411191  |
| 1420461_at   | MSTR1        | MACROPHAGE STIMULATING 1 RECEPTOR (C-MET-RELATED TYROSINE KINASE)       | 0.02447079 | 0.4533267   | 0.5421922   | 1.860201196  |
| 1421922_at   | SH3BP5       | SH3-DOMAIN BINDING PROTEIN 5 (BTK-ASSOCIATED)                           | 0.02447402 | 0.001534888 | 0.637853    | 0.792106174  |
| 1453401_at   | 170007G11RK  | RIKEN CDNA 170007G11 GENE                                               | 0.02451622 | 0.5520344   | 0.2688956   | 2.6889956    |
| 1422737_at   | NCOA3        | NUCLEAR RECEPTOR COACTIVATOR 3                                          | 0.02452468 | 0.01947548  | 0.1761461   | 1.124144845  |
| 1445740_at   | MASS1        | MONOGENIC, AUTODIGENIC SEIZURE SUSCEPTIBILITY 1                         | 0.02452538 | 0.00237364  | 0.2976891   | 1.574984611  |
| 1454055_at   | 1600029D15RK | RIKEN CDNA 1600029D15 GENE                                              | 0.02453796 | 0.01819689  | 0.617852    | 0.810842403  |
| 1437151_at   | USP22        | UBOQUITIN SPECIFIC PEPTIDASE 22                                         | 0.02457568 | 6.4016E-05  | 0.1864809   | 0.814565314  |
| 1429767_at   | 281003P96RK  | RIKEN CDNA 281003P96 GENE                                               | 0.02457877 | 0.4661835   | 0.7052198   | 0.801731213  |
| 1449113_at   | FP2          | ZINC FINGER PROTEIN 2                                                   | 0.02460435 | 0.0012029   | 0.0012029   | 0.800768474  |
| 1451059_at   | 493349D10RK  | RIKEN CDNA 493349D10 GENE                                               | 0.02464645 | 0.5158011   | 0.955785    | 2.099293813  |
| 1456000_at   | ---          | ---                                                                     | 0.02467319 | 0.06392541  | 0.2176024   | 1.18003341   |
| 1428144_at   | 311035I14RK  | RIKEN CDNA 311035I14 GENE                                               | 0.02470465 | 0.06914632  | 0.8119766   | 1.231228944  |
| 1438543_at   | Spat13       | Spermatogenesis associated 13                                           | 0.02474368 | 0.139331    | 0.6373263   | 0.513262063  |
| 1418084_at   | Np1          | neuropilin 1                                                            | 0.02481817 | 0.00758669  | 0.7319888   | 0.772023405  |
| 1450253_at   | Mmp14        | matrix metalloproteinase kinase kinase 4                                | 0.02483728 | 0.00189963  | 0.7809987   | 0.805379252  |
| 1445398_at   | 373241D22RK  | RIKEN CDNA 373241D22 GENE                                               | 0.02485832 | 0.02742409  | 0.1948449   | 0.65565619   |
| 1429041_at   | LOC436177    | SIMILAR TO CADHERIN-11 PRECURSOR (OSTEOBLAST-CADHERIN) (OSF-4)          | 0.02486246 | 0.2643033   | 0.2102306   | 0.854662434  |
| 1443818_at   | ---          | ---                                                                     | 0.024      |             |             |              |

|              |                            |                                                                        |            |             |              |              |
|--------------|----------------------------|------------------------------------------------------------------------|------------|-------------|--------------|--------------|
| 1483831_at   | YYPEL2                     | YYPEL-LIKE 2 (DRÖSOPHILA)                                              | 0.02628811 | 0.03708494  | 0.1327741    | 1.183492433  |
| 1483799_at   | CDC43D3                    | COILED-COIL-HELIX-COILED-COIL-HELIX DOMAIN CONTAINING 3                | 0.02628559 | 0.03142378  | 0.1326449    | 0.757781512  |
| 1486459_u_at | INRPA1                     | HETEROGENEOUS NUCLEAR RIBONUCLEOPROTEIN A1                             | 0.02631016 | 0.8989618   | 0.3248372    | 0.69806861   |
| 1489813_at   | 1700012D01RIK              | RIKEN CDNA 1700012D01 GENE                                             | 0.02631379 | 0.150065    | 0.3800639    | 1.247002777  |
| 1446912_at   | ---                        | ---                                                                    | 0.02624936 | 0.5556424   | 0.05943723   | 1.195578485  |
| 1448397_at   | DDIT3                      | DNA-DAMAGE INDUCIBLE TRANSCRIPT 3                                      | 0.02626237 | 0.1603979   | 0.6693483    | 0.52840339   |
| 1488743_at   | NK38483C08RIK              | RIKEN cDNA NK38483C08 GENE                                             | 0.02626491 | 0.1281019   | 0.3404989    | 0.457723659  |
| 1449399_at   | NEK2                       | NIMA INVERSE IN MITOSIS GENE(A)-RELATED EXPRESSED KINASE 2             | 0.02626592 | 0.127884    | 0.6811564    | 0.670888527  |
| 1440179_u_at | brca1                      | BRCA1 domain containing 1                                              | 0.02644831 | 0.9487208   | 0.0479205    | 1.352999095  |
| 1437480_at   | RIKEN CDNA 1110001A07 GENE | RIKEN CDNA 1110001A07 GENE                                             | 0.02645965 | 0.2465091   | 0.3271134    | 0.792924459  |
| 1453233_u_at | OACT1                      | O-ACYLTRANSFERASE (MEMBRANE BOUND) DOMAIN CONTAINING 1                 | 0.02646164 | 0.4778784   | 0.2296797    | 0.769181508  |
| 1425284_at   | RIKEN CDNA 1110004M10RIK   | RIKEN CDNA 1110004M10 GENE                                             | 0.02646481 | 0.2784891   | 0.8814191    | 0.915847322  |
| 1430033_at   | RIKEN CDNA 5330431K02RIK   | RIKEN CDNA 5330431K02 GENE                                             | 0.02648866 | 1.07839E-05 | 0.1061905    | 0.78332533   |
| 1435511_at   | SYN2                       | SYNAPSIN II                                                            | 0.02649023 | 0.2920195   | 0.4328866    | 0.823771104  |
| 1435550_at   | TRAF6                      | TNF RECEPTOR-ASSOCIATED FACTOR 6                                       | 0.02650297 | 0.8255188   | 0.789245572  | 1.138108485  |
| 1440581_at   | AS30088H08RIK              | RIKEN cDNA AS30088H08 GENE                                             | 0.02651028 | 0.3271257   | 0.0870163    | 0.69533337   |
| 1421252_u_at | Mez2                       | myocyte enhancer factor 2A                                             | 0.02654181 | 0.2597204   | 0.2009622    | 0.808017745  |
| 1429191_at   | 6833421H05RIK              | RIKEN CDNA 6833421H05 GENE                                             | 0.02655551 | 0.1116855   | 0.3211527    | 0.789245572  |
| 1429122_u_at | 170004003RIK               | RIKEN CDNA 170004003 GENE                                              | 0.02660763 | 0.7665851   | 0.4646549    | 1.232922246  |
| 1446380_at   | 9430076C15RIK              | RIKEN CDNA 9430076C15 GENE                                             | 0.02666891 | 0.3265822   | 0.05184005   | 0.589651611  |
| 149141_at    | RIKEN CDNA 1810008M10RIK   | RIKEN CDNA 1810008M10 GENE                                             | 0.02670001 | 0.8160038   | 0.2507422    | 0.566718061  |
| 1453807_at   | 6330563C09RIK              | RIKEN CDNA 6330563C09 GENE                                             | 0.02670329 | 0.0733042   | 0.3236027    | 1.173228855  |
| 1447941_u_at | BRAF                       | BRAF TRANSFORMING GENE                                                 | 0.02671369 | 0.1445554   | 0.07601548   | 1.13357953   |
| 1424382_at   | RCN3                       | RETICULOCALBIN 3; EF-HAND CALCIUM BINDING DOMAIN                       | 0.02674451 | 0.00874997  | 0.4992055    | 0.730264506  |
| 1432223_at   | 4930552N02RIK              | RIKEN CDNA 4930552N02 GENE                                             | 0.02683633 | 0.6896833   | 0.9005044    | 4.062061047  |
| 1428207_at   | BCL7A                      | B-CELL CLL LYMPHOMA 7A                                                 | 0.02688935 | 0.0792521   | 0.5448005    | 0.857383854  |
| 1444409_at   | RBP17A                     | RABPHILIN 3-LIKE (WITHOUT C2 DOMAINS)                                  | 0.02690938 | 0.062368    | 0.7094607    | 0.748195114  |
| 1450323_at   | 5730493B19RIK              | RIKEN CDNA 5730493B19 GENE                                             | 0.02692614 | 0.1268134   | 0.2010628    | 1.49152415   |
| 1446409_at   | GITDC1                     | GLYCOSYLTRANSFERASE-LIKE DOMAIN CONTAINING 1                           | 0.02696949 | 0.3405633   | 0.2010628    | 0.736418391  |
| 1424245_at   | C130075A20RIK              | RIKEN CDNA C130075A20 GENE                                             | 0.02701302 | 0.00959849  | 0.176680401  | 1.176680401  |
| 1445452_at   | 4930579C12RIK              | RIKEN CDNA 4930579C12 GENE                                             | 0.02708041 | 0.1398133   | 0.3171761    | 1.786898584  |
| 1444904_at   | CBFA2T1H                   | CBFA2T1 IDENTIFIED GENE HOMOLOG (HUMAN)                                | 0.02712077 | 0.9892325   | 0.05290933   | 1.329236888  |
| 1455555_at   | CD3C67                     | COILED-COIL DOMAIN CONTAINING 67                                       | 0.02715435 | 0.7843625   | 0.8394761    | 0.569309894  |
| 1449091_at   | Yiel                       | Yamaguchi sarcoma viral (y-v) oncoprotein homolog 1                    | 0.02715445 | 0.3315001   | 0.830669     | 0.70532829   |
| 1452653_at   | SLC25A22                   | SOLUTE CARRIER FAMILY 25 (MITOCHONDRIAL CARRIER, GLUTAMATE), MEMBER 22 | 0.02717683 | 0.0468722   | 0.773748     | 0.751786905  |
| 1442380_at   | LCN4                       | LIPICALIN 4                                                            | 0.02719281 | 0.1762895   | 0.0663991    | 0.618119536  |
| 1420236_at   | CRAMP1L                    | CRAL CRAMP-LIKE (DRÖSOPHILA)                                           | 0.02720717 | 0.3917238   | 0.86072334   | 0.86072334   |
| 1416622_at   | WBSRC16                    | WILLIAMS-BEUREN SYNDROME CHROMOSOME REGION 16 HOMOLOG (HUMAN)          | 0.02734077 | 0.001499114 | 0.05171627   | 1.033267211  |
| 1428141_at   | GG2                        | GOLGI ASSOCIATED, GAMMA ADAPTIN EAR CONTAINING, ARF BINDING PROTEIN 2  | 0.02734322 | 0.1662849   | 0.6322652    | 1.29765387   |
| 1422638_at   | PLZ2                       | PROLIFERIN-LIKE 2                                                      | 0.02737497 | 0.1253732   | 0.8544119    | 1.81617826   |
| 1439105_at   | CDAD1C                     | CYTIDINE AND DCMP DEAMINASE DOMAIN CONTAINING 1                        | 0.02737451 | 0.5795671   | 0.0545432    | 0.900433405  |
| 1438169_at   | Frm4b                      | FERM domain containing 4b                                              | 0.02746414 | 0.708717    | 0.5454221    | 0.618029941  |
| 1424812_at   | RCN715S                    | CINA SEQUENCE BOUND PROTEIN C substrate                                | 0.02747831 | 0.4278768   | 0.821516     | 0.85849358   |
| 1454972_at   | ATCAY                      | ATAXIA, CEREBELLAR, CAYMAN TYPE HOMOLOG (HUMAN)                        | 0.02750694 | 0.1355888   | 0.7229931    | 1.185790557  |
| 1449252_u_at | Lin7b                      | lin 7 homolog C (C. elegans)                                           | 0.02758348 | 1.75625E-06 | 0.8887706    | 0.718313878  |
| 1453244_u_at | 5830416P10RIK              | RIKEN CDNA 5830416P10 GENE                                             | 0.02759378 | 0.0416615   | 0.0416615    | 0.85849358   |
| 1419705_at   | CARS5                      | CARBONIC ANHYDRASE 5B, MITOCHONDRIAL                                   | 0.02760815 | 0.1982852   | 0.4066689    | 0.68538472   |
| 1446605_u_at | BCL2L11                    | BCL2-LIKE 11 (APOPTOSIS FACILITATOR)                                   | 0.02762811 | 0.0276441   | 0.0620748    | 1.141667268  |
| 1455038_at   | SLC30A3                    | SOLUTE CARRIER FAMILY 30 (ZINC TRANSPORTER), MEMBER 3                  | 0.02762566 | 0.9749951   | 0.249187     | 0.546873819  |
| 1446654_at   | 2110057K04RIK              | RIKEN CDNA 2110057K04 GENE                                             | 0.02768539 | 0.8172696   | 0.1681884    | 1.319195952  |
| 1446793_at   | RIKEN CDNA 1110057K04 GENE | RIKEN CDNA 1110057K04 GENE                                             | 0.02774118 | 0.9158436   | 0.1345822    | 0.806797716  |
| 1440387_at   | RIKEN CDNA 2610091F11 GENE | RIKEN CDNA 2610091F11 GENE                                             | 0.02774263 | 0.7732131   | 0.0561771    | 1.8162826261 |
| 1431297_u_at | 4933436C20RIK              | RIKEN CDNA 4933436C20 GENE                                             | 0.02774891 | 0.2586408   | 0.6391515    | 0.64012162   |
| 1453565_at   | ---                        | ---                                                                    | 0.02775278 | 0.1838527   | 0.16172329   | 1.25716632   |
| 1457946_at   | COXV                       | COX HOMEOBOX GENE                                                      | 0.02775676 | 0.030214    | 0.06321318   | 1.098131255  |
| 1491924_at   | 2210010105RIK              | RIKEN CDNA 2210010105 GENE                                             | 0.02778191 | 0.0590636   | 0.1606832    | 1.15020255   |
| 1444345_at   | ---                        | ---                                                                    | 0.02780911 | 0.7725292   | 0.4854881    | 1.478276449  |
| 1424740_u_at | rib2                       | ribin 2                                                                | 0.02781407 | 0.3801725   | 0.4040103    | 1.513374209  |
| 1435930_at   | ZFP291                     | RIKEN CDNA D530014003 GENE                                             | 0.02781593 | 0.1936661   | 0.4737513    | 0.784806609  |
| 1445359_at   | ADCV1                      | ADENYLATE CYCLASE 1                                                    | 0.02783848 | 0.02201534  | 0.8468609    | 1.314215302  |
| 1447174_at   | DACH1                      | DACHSHUND 1 (DRÖSOPHILA)                                               | 0.02784889 | 0.08816881  | 0.6134526    | 0.680212017  |
| 1444164_at   | PRF9                       | PRF9 PRE-MRNA PROCESSING FACTOR 39 HOMOLOG (YEAST)                     | 0.02784866 | 0.8557588   | 0.9180788    | 0.849117244  |
| 1424247_at   | ADCVAP1                    | ADENYLATE CYCLASE ACTIVATING POLYPEPTIDE 1                             | 0.02789827 | 0.1787896   | 0.8435914    | 1.424584802  |
| 1416124_at   | CNCD2                      | CYCLIN D2                                                              | 0.02797243 | 0.1099922   | 0.1570218    | 1.18669552   |
| 1458453_at   | LM107                      | LIM DOMAIN ONLY 7                                                      | 0.02818492 | 0.1191204   | 0.1581419    | 1.158141939  |
| 1455702_at   | ---                        | ---                                                                    | 0.02819681 | 0.7955148   | 0.1644258    | 0.91551697   |
| 1429168_at   | BTBD4                      | RIKEN CDNA 4934306L5 GENE                                              | 0.02811331 | 0.8594866   | 0.171878     | 1.32951584   |
| 142121_at    | Appp21                     | cytoic AMP-regulated phosphoprotein 21                                 | 0.02814594 | 9.98986E-06 | 0.944119     | 1.206170174  |
| 1439008_at   | ZKSCAN1                    | ZINC FINGER WITH KRAB AND SCAN DOMAINS 1                               | 0.0281877  | 0.00013647  | 0.0610184    | 1.058419604  |
| 1443595_at   | CNO74                      | CCR-NOT TRANSCRIPTION COMPLEX, SUBUNIT 6-LIKE                          | 0.02818792 | 0.16492589  | 0.09052131   | 0.668272575  |
| 1427954_at   | RCN5403                    | RIKEN CDNA 5830416P10 GENE                                             | 0.02819938 | 0.09709398  | 0.8006939    | 0.85849358   |
| 1417262_at   | FIG2                       | PROSTAGLANDIN-ENDOPEROXIDASE SYNTHASE 2                                | 0.0282431  | 0.4324683   | 0.5577079    | 1.51279887   |
| 1449276_u_at | ENPP1                      | ECTONUCLEOTIDIC PYROPHOSPHATASE/PHOSPHODIESTERASE 1                    | 0.0282493  | 0.2348191   | 0.1613038    | 1.199466878  |
| 1456072_at   | Man2c                      | 1,6-mannosylidene dihydroxyacetone C substrate                         | 0.02825233 | 0.0298824   | 0.60177881   | 0.60177881   |
| 1421622_u_at | Ragg4f                     | Rap guanine nucleotide exchange factor (GEF) 4                         | 0.0282704  | 0.09721107  | 0.8223147    | 0.759239884  |
| 1423542_at   | KLK7                       | KALLIKREIN 7 (CHYMOTRYPSIN, STRIPAN CORNEUM)                           | 0.02827828 | 0.2453622   | 0.1620241    | 0.564578787  |
| 1423753_at   | RAMBI                      | RAMP AND ACTIVIN MEMBRANE-BINDING INHIBITOR, HOMOLOG (XENOPUS LAEVIS)  | 0.02831364 | 0.0306951   | 0.722646678  | 0.722646678  |
| 1433683_at   | RBMS5B                     | RNA BINDING MOTIF PROTEIN 5B                                           | 0.02833033 | 0.9546075   | 0.837179     | 2.639759968  |
| 1423254_u_at | 231004007RIK               | RIKEN CDNA 231004007 GENE                                              | 0.02838255 | 0.01392439  | 0.7456554    | 0.815509499  |
| 1438384_at   | 943008034RIK               | RIKEN CDNA 943008034 GENE                                              | 0.02838426 | 0.7237884   | 0.951481     | 0.789292552  |
| 1428569_at   | B320171C12RIK              | RIKEN CDNA B320171C12 GENE                                             | 0.02840996 | 0.3984444   | 0.1065815    | 1.404881348  |
| 1437396_at   | CREB3L2                    | CAMP RESPONSIVE ELEMENT BINDING PROTEIN 3-LIKE 2                       | 0.02841595 | 0.2609736   | 0.1327753    | 1.159821771  |
| 1451008_at   | STSSA3                     | STYLAIPALIN-ACTIVIN-RECEPTOR-ASSOCIATED 3                              | 0.02841927 | 0.1637984   | 0.6703821    | 1.208351187  |
| 1429654_at   | DDPA2                      | DEVELOPMENTAL PL10-PROTEIN ASSOCIATED 2                                | 0.02842075 | 0.2871306   | 0.272118     | 2.206154784  |
| 1439731_at   | RIKEN cDNA E130309F12 GENE | RIKEN cDNA E130309F12 GENE                                             | 0.02846126 | 0.8347113   | 0.1515768    | 1.194145061  |
| 1421302_u_at | GNAS1                      | GUANINE NUCLEOTIDE BINDING PROTEIN, ALPHA 15                           | 0.02846268 | 0.1480909   | 0.05601144   | 0.853461601  |
| 1424116_at   | PRK1                       | PROLINE SERINE-RICH COILED-COIL 1                                      | 0.02847281 | 0.0763129   | 0.1799818    | 1.1799818    |
| 1429606_at   | 4930572B16RIK              | RIKEN CDNA 4930572B16 GENE                                             | 0.02850549 | 0.1716932   | 0.4499558    | 1.288528626  |
| 1421833_at   | Pp61a                      | phosphatidylinositol-4-phosphate 5-kinase, type 1 alpha                | 0.02852333 | 0.771789    | 0.3302626    | 0.877554136  |
| 1424096_at   | PHK87                      | PHOSPHOINOSITIDE 3-OH DEHYDROXYLASE                                    | 0.02853666 | 0.6140848   | 0.8467186    | 1.0467186    |
| 1428195_at   | 4631427C17RIK              | RIKEN cDNA 4631427C17 GENE                                             | 0.02860157 | 0.159951105 | 0.6288016    | 0.752831068  |
| 1426005_at   | DMP1                       | DENTIN MATRIX PROTEIN 1                                                | 0.02860367 | 0.477993    | 0.1205708    | 0.732957978  |
| 1458421_at   | Egfs                       | transforming growth factor alpha                                       | 0.02872783 | 0.00292842  | 0.86240364   | 0.86240364   |
| 1452474_u_at | ART3                       | ADEN-TRIBOSYLTRANSFERASE 3                                             | 0.02876239 | 0.8919958   | 0.09329204   | 1.240276469  |
| 1428497_at   | SECSB2                     | SECS BINDING PROTEIN 2                                                 | 0.0287838  | 0.2394883   | 0.8156219    | 1.187464224  |
| 1446300_at   | ---                        | ---                                                                    | 0.0288559  | 0.08196272  | 0.6835299    | 1.358520996  |
| 1441843_u_at | 5230400M03RIK              | RIKEN CDNA 5230400M03 GENE                                             | 0.02888634 | 0.4677496   | 0.08228236   | 1.525086992  |
| 1445463_at   | 9430099H24RIK              | RIKEN CDNA 9430099H24 GENE                                             | 0.02892566 | 0.4009779   | 0.3739663    | 2.304992226  |
| 1453703_at   | AKT2                       | PROTEIN KINASE C-ALPHA GENE 2                                          | 0.02893945 | 0.7007042   | 0.1312123387 | 1.312123387  |
| 1435500_u_at | RA26                       | RA26, MEMBER RAS ONCOGENE FAMILY                                       | 0.02894044 | 0.2283889   | 0.7411815    | 0.781013873  |
| 1447865_u_at | PZFD1                      | PZD DOMAIN CONTAINING 11                                               | 0.02897326 | 0.0147963   | 0.1040935    | 0.861136627  |
| 1450972_at   | RIKEN CDNA 1110040N11RIK   | RIKEN CDNA 1110040N11 GENE                                             | 0.0289861  | 0.6286125   | 0.878763524  | 0.878763524  |
| 1430357_at   | HJ3B                       | H3 HISTONE, FAMILY 3A                                                  | 0.02903716 | 0.8066295   | 0.2127476    | 1.35207725   |
| 1437250_at   | WD12                       | WHN-DEPENDENT TRANSCRIPT 2                                             | 0.0290918  | 0.472715    | 0.6386353    | 0.76353384   |
| 1455449_at   | TYC3                       | TYRINATRIPEPTIDE REPEAT DOMAIN 9                                       | 0.02907558 | 0.00974695  | 0.10037105   | 1.10037105   |
| 1492726_at   | A430107D22RIK              | RIKEN CDNA A430107D22 GENE                                             | 0.0290788  | 0.1795731   | 0.5266907    | 2.143464452  |
| 1433661_at   | BC034204                   | CINA SEQUENCE BOUND PROTEIN                                            |            |             |              |              |

|              |               |                                                                                            |             |             |              |              |
|--------------|---------------|--------------------------------------------------------------------------------------------|-------------|-------------|--------------|--------------|
| 1434442_at   | DSHRTD593E    | DNA SEGMENT, CHR 5, ERATO DOI 593, EXPRESSED                                               | 0.03037271  | 0.5724891   | 0.4689454    | 1.271882412  |
| 1432834_at   | C308002073RJK | RIKEN CDNA C308002073 GENE                                                                 | 0.03044422  | 0.06812207  | 0.8032322    | 1.087434904  |
| 1435324_at   | 633059M23RJK  | RIKEN CDNA 633059M23 GENE                                                                  | 0.03052875  | 0.6913863   | 0.57959      | 0.821496753  |
| 1436838_at   | BC072620      | CDNA SEQUENCE BC072620                                                                     | 0.03060997  | 0.07782224  | 0.9823758    | 1.210982802  |
| 1439532_at   | GRM7          | GLUTAMATE RECEPTOR METABOTROPIC 7                                                          | 0.03063126  | 0.01696811  | 0.9585       | 1.309291817  |
| 1439081_at   | ATG10         | AUTOPLAGY-RELATED 10 (YEAST)                                                               | 0.0306523   | 0.6964258   | 0.7063499    | 0.710006738  |
| 1448650_at   | POLE          | POLYMERASE (DNA DIRECTED), EPSILON                                                         | 0.03071251  | 0.04128191  | 0.1922769    | 0.510094594  |
| 1435340_at   | PABPC1        | POLY(A) BINDING PROTEIN, CYTOSOLIC 1                                                       | 0.03072717  | 0.1110428   | 0.1110428    | 0.8141451012 |
| 1437241_at   | LRRK4C        | LEUCINE RICH REPEAT CONTAINING 48                                                          | 0.03075167  | 0.6219162   | 0.6219162    | 0.549266646  |
| 1417699_at   | GIT2F1        | RIKEN CDNA 2810405L04 GENE                                                                 | 0.03079854  | 6.31051E-07 | 0.0850538    | 1.016737227  |
| 1422168_at   | Rblp          | brain derived neurotrophic factor                                                          | 0.03080196  | 0.1390533   | 0.9832214    | 1.328692047  |
| 1436473_at   | ARE2          | ADENOSINE RIBOSYLATION FACTOR 2                                                            | 0.03083759  | 0.4220078   | 0.0557263    | 1.131848024  |
| 1423904_at   | PVR           | POLIOVIRUS RECEPTOR                                                                        | 0.03092701  | 0.8304499   | 0.8953158    | 0.823571328  |
| 1419929_at   | D15HRTD55E    | DNA SEGMENT, CHR 15, ERATO DOI 55, EXPRESSED                                               | 0.03099976  | 0.7213788   | 0.2525854    | 1.228851988  |
| 1438717_at   | OSM2F6        | OSYSTEIN BINDING PROTEIN, CYTOSOLIC 6                                                      | 0.03098773  | 0.08438625  | 0.1302146    | 1.211701766  |
| 1423839_at   | 6430598H11RJK | RIKEN CDNA 6430598H11 GENE                                                                 | 0.03098109  | 0.003365673 | 0.1635255    | 1.123884976  |
| 1436411_at   | RCDD1         | RC1 DOMAIN CONTAINING 1                                                                    | 0.03099857  | 0.0843517   | 0.9687664    | 0.766656597  |
| 1431618_at   | D14I46481E    | DNA SEGMENT, CHR 14, ERATO D04 881, EXPRESSED                                              | 0.03099887  | 0.6139992   | 0.718581     | 0.855496234  |
| 1421155_at   | BGAL16        | UDP-GAL-BETAGAL BETA 1,3-GALACTOSYLTRANSFERASE, POLYPEPTIDE 6                              | 0.03100382  | 0.2961159   | 0.3856761    | 0.825627538  |
| 1448616_at   | DVL2          | DISHVEILED 2, DSH HOMOLOG (DROSOPHILA)                                                     | 0.03100802  | 0.7160406   | 0.1971251    | 1.418461166  |
| 1426539_at   | ICSP11        | ICPULVIN SPECIFIC FACTOR 11                                                                | 0.03102127  | 0.2051984   | 0.741781     | 0.883128061  |
| 1434720_at   | 953003124RJK  | RIKEN CDNA 953003124 GENE                                                                  | 0.0311025   | 0.5893303   | 0.2955581    | 0.81641823   |
| 1446861_at   | GNS           | GLUCOSAMINE (N-ACETYL)-6-SULFATASE                                                         | 0.03112942  | 0.7580105   | 0.08817099   | 0.844620724  |
| 1442309_at   | Big1          | B-cell translocation gene 1, anti-proliferative                                            | 0.03113214  | 0.06441998  | 0.324839     | 1.305388232  |
| 1449085_at   | PHF10         | PHD FINGER PROTEIN 10                                                                      | 0.03112738  | 0.2050186   | 0.322917     | 0.624381296  |
| 1442135_at   | GM237         | GENE MODEL 237, (NCBI)                                                                     | 0.03112786  | 0.060990547 | 0.3105624    | 1.090118001  |
| 1420977_at   | Man1a2        | mannosidase, alpha, class 1A, member 2                                                     | 0.03123936  | 0.5491586   | 0.1757548    | 0.708166898  |
| 1457762_at   | TTIC15        | TETRAICICLOPEPTIDE REPEAT DOMAIN 15                                                        | 0.03134348  | 0.05138673  | 0.1459759    | 0.841264184  |
| 1436601_at   | TBR2          | TRANSFORMER BETA 2                                                                         | 0.03151808  | 0.17795308  | 0.6825431    | 0.832443341  |
| 1449747_at   | BCDIN3        | BIN, BICOID-INTERACTING 3, HOMOLOG (DROSOPHILA)                                            | 0.03138064  | 0.04044382  | 0.5427921    | 0.604103939  |
| 1451397_at   | TNR3C5        | RIKEN CDNA 261004H01 GENE                                                                  | 0.03139347  | 3.83638E-05 | 0.2174569    | 1.0707971    |
| 1435114_at   | WDHD1         | WD REPEAT AND HMG BOX DNA BINDING PROTEIN 1                                                | 0.03142432  | 0.05175173  | 0.5070761    | 0.835346463  |
| 14318159_at  | TCTP2         | TRANSCRIPTION FACTOR CP2                                                                   | 0.0314557   | 0.0339139   | 0.8427372    | 0.831342303  |
| 1416545_at   | ZDHHC7        | ZINC FINGER, DHHC DOMAIN CONTAINING 7                                                      | 0.03146288  | 0.08833976  | 0.3969911    | 1.183258628  |
| 1431904_at   | 4933427G17RJK | RIKEN cDNA 4933427G17 GENE                                                                 | 0.03146797  | 0.8713679   | 0.9088416    | 0.54971184   |
| 1438715_at   | STK38L        | SERINE/THREONINE KINASE 38 LIKE                                                            | 0.03147401  | 0.8889877   | 0.3191767    | 0.515292023  |
| 1435577_at   | CI30089N23RJK | RIKEN CDNA CI30089N23 GENE                                                                 | 0.03150664  | 0.000344993 | 0.2940046    | 1.074536029  |
| 1435579_at   | CI1000409RJK  | RIKEN CDNA CI1000409 GENE                                                                  | 0.03154391  | 0.218193    | 0.29996      | 1.183559117  |
| 1452576_at   | Hcf2          | host cell factor 2                                                                         | 0.03156532  | 0.0796238   | 0.91567      | 1.173290978  |
| 1438328_at   | GALNTL2       | UDP-N-ACETYL-L-ALPHA-D-GALACTOSAMINE-POLYPEPTIDE N-ACETYL GALACTOSAMINYLTRANSFERASE-LIKE 2 | 0.03158644  | 0.2243732   | 0.973171     | 0.828574901  |
| 1429235_at   | MEF2D         | MYOCTYL ENHANCER FACTOR, MYOGENESIS 2                                                      | 0.03159883  | 0.1640824   | 0.100098     | 1.352288326  |
| 1434487_at   | AB48149       | EXPRESSED SEQUENCE AB48149                                                                 | 0.03164845  | 0.8956967   | 0.916587     | 0.695427675  |
| 1455489_at   | LRRMT2        | LEUCINE RICH REPEAT TRANSMEMBRANE NEURONAL 2                                               | 0.03168259  | 0.0567274   | 0.4888948    | 1.183703886  |
| 1439476_at   | Dag2          | delta2                                                                                     | 0.0316883   | 0.000262469 | 0.60411859   | 1.11219033   |
| 1438991_at   | CTNND2        | CATENIN (CADHERIN ASSOCIATED PROTEIN), DELTA 2                                             | 0.03169422  | 0.530713    | 0.3460926    | 0.655231594  |
| 1437355_at   | ZCCHC5        | ZINC FINGER, CTCF DOMAIN CONTAINING 5                                                      | 0.0317482   | 0.8283647   | 0.976292     | 1.240191722  |
| 1428800_at   | Pc17          | peacock/late synaptic protein homolog 5, cerevisiae-like                                   | 0.03174995  | 0.192816    | 0.581586     | 0.347699731  |
| 1431612_at   | 170000710RJK  | RIKEN CDNA 170000710 GENE                                                                  | 0.03175339  | 0.0797516   | 0.6151124    | 0.832443341  |
| 1435100_at   | AI3004220RJK  | RIKEN CDNA AI3004220 GENE                                                                  | 0.03176565  | 0.4539628   | 0.90087265   | 1.982036653  |
| 1440106_at   | CTCA          | TRANSCRIPTION FACTOR 4                                                                     | 0.031770069 | 0.2063585   | 0.842418     | 0.671905963  |
| 1430401_at   | 6330406005RJK | RIKEN CDNA 6330406005 GENE                                                                 | 0.03184522  | 0.0501813   | 0.11909161   | 0.6151124    |
| 1427592_at   | PCD17         | PROTODCADHERIN 7                                                                           | 0.03188319  | 0.3144853   | 0.5544736    | 1.267100325  |
| 1431464_at   | PRM2          | PROPHOSPHATINOMYLASE 2                                                                     | 0.03190216  | 0.002170475 | 0.1366964    | 1.423132505  |
| 1454330_at   | 4933415D04RJK | RIKEN CDNA 4933415D04 GENE                                                                 | 0.03192455  | 0.06601808  | 0.6232366    | 1.193567759  |
| 1447364_at   | Mylv1b        | myosin IIb                                                                                 | 0.03197283  | 0.000586316 | 0.0591986    | 0.492390687  |
| 1441994_at   | PCDH16        | PROTODCADHERIN BETA 16                                                                     | 0.03199798  | 0.1158481   | 0.8013172    | 1.611386461  |
| 1450172_at   | PKNOX1        | PREX-KNOTTED 1 (HOMEBOX)                                                                   | 0.03202865  | 0.6555105   | 0.0541128    | 0.835964402  |
| 1416823_at   | OSBP1A        | OXYSTEROL BINDING PROTEIN-LIKE 1A                                                          | 0.03208172  | 0.0678401   | 0.3661162    | 0.61326891   |
| 1455800_at   | RAPGEF5       | RAP GUANINE NUCLEOTIDE EXCHANGE FACTOR (GEF) 5                                             | 0.03211797  | 0.048317515 | 0.9504426    | 0.863493438  |
| 1439843_at   | Gamb4         | glycine calcium-dependent protein kinase 4                                                 | 0.03214217  | 0.2952491   | 0.242146     | 0.711039859  |
| 1431511_at   | A1747699      | EXPRESSED SEQUENCE A1747699                                                                | 0.03217191  | 0.8340157   | 0.3424783    | 0.606211505  |
| 1434909_at   | Rngp          | Ras-related GTP binding 9                                                                  | 0.0321773   | 0.2357366   | 0.2639043    | 1.261125287  |
| 1432595_at   | DHHC10E       | DNA SEGMENT, CHR 5, BUCAN 30 EXPRESSED                                                     | 0.0322358   | 0.3141249   | 0.91617      | 0.855662431  |
| 1457876_at   | DHHC10E       | DNA SEGMENT, CHR 9, ERATO D01 496, EXPRESSED                                               | 0.03224007  | 0.1485661   | 0.392302     | 2.578991928  |
| 1458754_at   | ---           | ---                                                                                        | 0.03224353  | 0.3148941   | 0.5260082    | 1.05029464   |
| 1425279_at   | PHK1          | PLD1M1 INTERACTING KINASE 1 LIKE                                                           | 0.03225669  | 0.0848016   | 0.916587     | 1.116152828  |
| 1431869_at   | 5730419F03RJK | RIKEN CDNA 5730419F03 GENE                                                                 | 0.03226135  | 0.3019443   | 0.4382975    | 0.559725768  |
| 1420563_at   | GRIA3         | GLUTAMATE RECEPTOR, IONOTROPIC, AMPA3 (ALPHA 3)                                            | 0.03226265  | 0.0094477   | 0.5601857    | 1.158800743  |
| 1417483_at   | NKXIFZ        | NUCLEAR FACTOR OF KAPPA LIGHT POLYPEPTIDE GENE ENHANCER IN B-CELLS INHIBITOR, ZETA         | 0.03226283  | 0.3261289   | 0.4695274    | 0.695427675  |
| 1453573_at   | HIST1H3D      | HISTONE 2, H3C1                                                                            | 0.03230355  | 0.644705    | 0.910402     | 1.31318134   |
| 1427635_at   | KIF3C         | KINESIN FAMILY MEMBER 3C                                                                   | 0.03231055  | 0.5447145   | 0.3047797    | 1.296516796  |
| 1433010_at   | 737047817RJK  | RIKEN CDNA 737047817 GENE                                                                  | 0.03234512  | 0.194186    | 0.3560396    | 0.407315166  |
| 1474683_x_at | METTL1        | METHYLTRANSFERASE-LIKE 1                                                                   | 0.03237271  | 0.000766769 | 0.3377759    | 0.679897336  |
| 1439712_at   | 4921521J11RJK | RIKEN CDNA 4921521J11 GENE                                                                 | 0.03240486  | 0.7350109   | 0.2673396    | 1.432180853  |
| 1429305_at   | ANKRD10       | ANKRYN REPEAT DOMAIN 10                                                                    | 0.03241991  | 0.061695162 | 0.120128001  | 0.6151124    |
| 1424905_at   | SLC19A11      | SOLUTE CARRIER FAMILY 39 (METAL ION TRANSPORTER), MEMBER 11                                | 0.03244235  | 0.5169909   | 0.211965     | 0.859248231  |
| 1440336_at   | PRMT6         | PROTEIN ARGININE N-METHYLTRANSFERASE 6                                                     | 0.03246264  | 0.5787422   | 0.108171     | 1.304969098  |
| 1423853_at   | 6330427006RJK | RIKEN CDNA 6330427006 GENE                                                                 | 0.03248529  | 0.4252645   | 0.6727817471 | 0.727871471  |
| 1448955_at   | CDYL          | CHROMOSOMAL PROTEIN, Y CHROMOSOME-LIKE                                                     | 0.0324944   | 0.5169909   | 0.121965     | 1.276155481  |
| 1431106_at   | 953005105RJK  | RIKEN CDNA 953005105 GENE                                                                  | 0.03249585  | 0.0507061   | 0.0517186    | 1.36417512   |
| 1428342_at   | Roes1         | REST corepressor 1                                                                         | 0.03250442  | 0.0455413   | 0.6743517    | 0.73108061   |
| 1437074_at   | SNXS          | SORING NEXIN 5                                                                             | 0.03254664  | 0.0748691   | 0.3909595    | 0.77343093   |
| 1447244_at   | DAK           | DHAPYRUVATE KINASE 2 HOMOLOG (YEAST)                                                       | 0.0325567   | 0.5574866   | 0.823766     | 0.398840269  |
| 1445240_at   | AI1019796     | EXPRESSED SEQUENCE AI1019796                                                               | 0.03262634  | 0.3757335   | 0.1564708    | 0.64130629   |
| 1439499_at   | AA415798      | EXPRESSED SEQUENCE AA415798                                                                | 0.0326288   | 0.8240465   | 0.431629     | 0.7424564    |
| 1458215_at   | SETDB1        | ERG-ASSOCIATED PROTEIN                                                                     | 0.03271348  | 0.6426604   | 0.8478235    | 0.64441105   |
| 1421224_at   | 4930506G17RJK | RIKEN CDNA 4930506G17 GENE                                                                 | 0.03272719  | 0.8427106   | 0.230363     | 0.880463476  |
| 1449913_at   | CFB4          | CYTOSOLIC PHOSPHORYLATION ELEMENT BINDING PROTEIN 4                                        | 0.03273377  | 0.0173657   | 0.431629     | 0.7424564    |
| 1419984_x_at | ZFP644        | ZINC FINGER PROTEIN 644                                                                    | 0.0328203   | 0.003810318 | 0.7789127    | 0.848401686  |
| 1438750_at   | ATRX          | ALPHA THALASSEMIA/MENTAL RETARDATION SYNDROME X-LINKED HOMOLOG (HUMAN)                     | 0.03281546  | 0.2032703   | 0.5199998    | 0.769881797  |
| 1438746_at   | 6330107D13RJK | RIKEN CDNA 6330107D13 GENE                                                                 | 0.03282873  | 0.5104839   | 0.8349802    | 0.81974264   |
| 1433994_at   | 9311606P16RJK | RIKEN CDNA 9311606P16 GENE                                                                 | 0.03284657  | 0.08158164  | 0.1205159    | 0.880604546  |
| 1429189_at   | 1110007C02RJK | RIKEN CDNA 1110007C02 GENE                                                                 | 0.0328816   | 0.6667218   | 0.2501563    | 0.826957     |
| 1467390_at   | Zfp462        | zinc finger protein 462                                                                    | 0.03289222  | 0.4742529   | 0.4742529    | 0.785243339  |
| 1424515_at   | B230354K17RJK | RIKEN CDNA B230354K17 GENE                                                                 | 0.03292239  | 2.33565E-09 | 0.0759127    | 0.835781456  |
| 1442726_at   | BC014685      | CDNA SEQUENCE BC014685                                                                     | 0.03303992  | 0.5692221   | 0.0852454    | 1.15919742   |
| 1454136_at   | PRUNE         | PRUNE HOMOLOG (DROSOPHILA)                                                                 | 0.03306694  | 0.1776865   | 0.1801430    | 0.848140426  |
| 1446129_at   | ---           | ---                                                                                        | 0.03309573  | 0.4928533   | 0.61090219   | 0.774535985  |
| 1435339_at   | KCTD15        | POTASSIUM CHANNEL TETRAMERISATION DOMAIN CONTAINING 15                                     | 0.03311747  | 0.1514147   | 0.3520005    | 1.143537359  |
| 1421159_at   | CENL1         | CENL1-LIKE 1                                                                               | 0.03314334  | 0.6481594   | 0.107801     | 0.807814502  |
| 1440602_at   | GRIK2         | GLUTAMATE RECEPTOR, IONOTROPIC, KAINATE 2 (BETA 2)                                         | 0.03315276  | 0.08469167  | 0.9439325    | 0.274650593  |
| 1442722_at   | ---           | ---                                                                                        | 0.03316165  | 0.04535551  | 0.7301195    | 0.629393281  |
| 1435901_at   | ALDOA-PS2     | ALDOSE 1,4 ISOMERASE                                                                       | 0.03319721  | 0.09596367  | 0.378174197  | 0.82416184   |
| 1428200_x_at | N1AN1         | N-TERMINAL ASN AMIDASE                                                                     | 0.03319882  | 0.9369554   | 0.922644     | 0.784110937  |
| 1443157_at   | ---           | ---                                                                                        | 0.03320373  | 0.02292211  | 0.0519224    | 0.76298145   |
| 1441854_at   | MFAP5         | MICROFIBRILLAR ASSOCIATED PROTEIN 5                                                        | 0.03321246  | 0.2265815   | 0.378174197  | 0.200198233  |
| 1444912_at   | ---           | ---                                                                                        | 0.03323964  | 0.00668337  | 0.3306102    | 0.725942686  |
| 1445061_at   | ---           | ---                                                                                        | 0.03335939  | 0.2702577   | 0.910411     | 0.61501258   |
| 1440951_at   | NKXBL1        |                                                                                            |             |             |              |              |

|           |               |                                                                                              |             |             |             |             |
|-----------|---------------|----------------------------------------------------------------------------------------------|-------------|-------------|-------------|-------------|
| 142757_a  | CDA           | CYTIDINE DEAMINASE                                                                           | 0.03478602  | 6.22154E-06 | 0.308009    | 1.327959623 |
| 144796_a  | C78676        | EXPRESSED SEQUENCE: C78676                                                                   | 0.03479859  | 0.5005629   | 0.1750963   | 1.700227238 |
| 1441623_a | ---           | ---                                                                                          | 0.03479689  | 0.1272333   | 0.4170674   | 2.342947664 |
| 1436426_a | 573059K17R1K  | R1KEN CDNA 573059K17 GENE                                                                    | 0.03484504  | 0.00851909  | 0.2396349   | 0.811872278 |
| 1420519_a | HAS3          | HYALURONAN SYNTHASE 3                                                                        | 0.03487623  | 0.0181691   | 0.0231897   | 1.960690165 |
| 1425456_a | BC003965      | CDNA SEQUENCE BC003965                                                                       | 0.03490701  | 0.792418    | 0.881497    | 0.836661492 |
| 1452244_a | 63306015R1K   | R1KEN CDNA 63306015 GENE                                                                     | 0.03497887  | 0.3975873   | 0.7071891   | 0.627141481 |
| 1436615_a | OTC           | ORNITHINE TRANS-CARBAMYLASE                                                                  | 0.03497959  | 0.3370314   | 0.5500729   | 0.483801707 |
| 1447281_a | ---           | ---                                                                                          | 0.03498865  | 0.1546845   | 0.0522284   | 0.52547544  |
| 1422277_a | GLRA1         | GLYCINE RECEPTOR, ALPHA 1 SUBUNIT                                                            | 0.0350244   | 0.0115665   | 0.7663103   | 0.698751056 |
| 1409548_a | Elnk2         | elphn R2                                                                                     | 0.03503687  | 0.00602742  | 0.8444251   | 1.260037629 |
| 1444084_a | PRKG4         | PROLINE RICH GLA (G-CARBOXYGLUTAMIC ACID) 4 (TRANSMEMBRANE)                                  | 0.03504841  | 0.0581542   | 0.520314    | 1.544994771 |
| 1445424_a | ADRA1D        | ADRENERGIC RECEPTOR, ALPHA 1D                                                                | 0.03509085  | 0.05413668  | 0.960257    | 1.427562684 |
| 1447344_a | ---           | ---                                                                                          | 0.03511888  | 0.0373914   | 0.3979271   | 1.214344746 |
| 1427571_a | SHH           | SONIC HEDGEHOG                                                                               | 0.03515337  | 0.0168973   | 0.1843139   | 0.622686826 |
| 1434156_a | RAB11FIP4     | RAB11 FAMILY INTERACTING PROTEIN 4 (CLASS II)                                                | 0.03515737  | 0.999138    | 0.8588399   | 1.203682177 |
| 1442755_a | PANK2         | PANTOTHENATE KINASE 2 (HALLERVORDEN-SPATZ SYNDROME)                                          | 0.035114545 | 0.7019035   | 0.3601418   | 1.523095438 |
| 1424703_a | HBMK1         | HBMK METHYLTRANSFERASE FAMILY MEMBER 1                                                       | 0.03515228  | 0.08952818  | 0.998676    | 1.207931355 |
| 1429845_a | 1700019L03R1K | R1KEN CDNA 1700019L03 GENE                                                                   | 0.03517118  | 0.8051304   | 0.33817     | 1.586663206 |
| 1429113_a | ROR1          | RECEPTOR TYROSINE KINASE-LIKE ORPHAN RECEPTOR 1                                              | 0.03517229  | 0.3376804   | 0.4175476   | 0.590700849 |
| 1422791_a | PAFAR1B2      | PLATELET-ACTIVATING FACTOR ACETYLDIHYDROLASE, ISOFORM 1B, ALPHA2 SUBUNIT                     | 0.03515333  | 0.006429635 | 0.66078099  | 1.292428836 |
| 1416111_a | CD83          | CD83 ANTIGEN                                                                                 | 0.03524127  | 0.6747701   | 0.5330676   | 0.715717038 |
| 1416173_a | PEST1         | PISCADILLO HOMOLOG 1, CONTAINING BRCT DOMAIN (ZEBRAFISH)                                     | 0.0353552   | 0.7024998   | 0.5929732   | 0.844964181 |
| 1417164_a | DCSP10        | DIAL SPECIFICITY PHOSPHATASE 10                                                              | 0.03536202  | 0.0791714   | 0.09004224  | 0.84280562  |
| 1424880_a | TRH1          | TRIBBLIS HOMOLOG 1 (DROSOPHILA)                                                              | 0.03538977  | 0.8013604   | 0.0876436   | 1.93572517  |
| 1438265_a | WWC2          | DNA SEGMENT, CHR 8, ERATO DOI 594, EXPRESSED                                                 | 0.03540212  | 0.7024998   | 0.1895193   | 0.879002109 |
| 1429234_a | Sept11        | 0.03546521                                                                                   | 0.9630766   | 0.3400181   | 1.1972124   | 0.8400118   |
| 1452280_a | FARP1         | FERM-HOGEF (ARHGEF) AND PLECKSTRIN DOMAIN PROTEIN 1 (CHONDROCTE-DERIVED)                     | 0.03552745  | 0.4076252   | 0.2399914   | 1.187066722 |
| 1419178_a | CD3G          | CD3 ANTIGEN, GAMMA POLYPEPTIDE                                                               | 0.03559366  | 0.8784198   | 0.792674    | 2.176575406 |
| 1433125_a | 0.03560893    | 0.00916226                                                                                   | 0.0916226   | 0.0916226   | 0.0916226   | 0.0916226   |
| 1458051_a | A23084021R1K  | R1KEN CDNA A23084021 GENE                                                                    | 0.03561235  | 0.5886284   | 0.5556388   | 1.333665267 |
| 1441481_a | MFAP3L        | MICROFIBRILLAR-ASSOCIATED PROTEIN 3-LIKE                                                     | 0.03563561  | 0.6714651   | 0.466439    | 1.147076523 |
| 1439544_a | RPS6KA4       | RIBOSOMAL PROTEIN S6 KINASE, POLYPEPTIDE 4                                                   | 0.03564483  | 0.3174195   | 0.6218622   | 1.915407234 |
| 1420307_a | PITPNB        | PHOSPHATIDYLINOSITOL TRANSFER, BETA                                                          | 0.03567077  | 0.04512988  | 0.490272    | 1.108568881 |
| 1437124_a | A630552C17R1K | R1KEN CDNA A630552C17 GENE                                                                   | 0.03567287  | 0.7835696   | 0.500554    | 0.731295478 |
| 1420785_a | GAB2          | GROWTH FACTOR RECEPTOR BOUND PROTEIN 2-ASSOCIATED PROTEIN 2                                  | 0.03567978  | 0.03110082  | 0.06144965  | 1.13626416  |
| 1429200_a | SAAL1         | SERUM AMYLASE A-LIKE 1                                                                       | 0.03570179  | 0.0137923   | 0.1856729   | 1.15731451  |
| 1424056_a | Zfp608        | Zinc finger protein 608                                                                      | 0.03572325  | 0.02006874  | 0.8856588   | 1.265459881 |
| 1430905_a | 1110012016R1K | R1KEN CDNA 1110012016 GENE                                                                   | 0.03573083  | 0.8644991   | 0.111376    | 1.560767839 |
| 1430013_a | TFP           | TYROSINE PHOSPHATASE FACTOR                                                                  | 0.03579254  | 0.0567297   | 0.6979123   | 0.869721523 |
| 1424138_a | RHBD1F        | RHOMBOD FAMILY 1 (DROSOPHILA)                                                                | 0.03580473  | 0.0858831   | 0.3073806   | 1.130289113 |
| 1454229_a | 493342409R1K  | R1KEN CDNA 493342409 GENE                                                                    | 0.03584223  | 0.009100787 | 0.1932982   | 0.816027124 |
| 1421115_a | TLTB1         | TLTB-LIKE TYROSINE KINASE 3 LIGAND                                                           | 0.03587821  | 0.4549742   | 0.481396    | 1.319164586 |
| 1447222_a | Hsp12a        | heat shock protein 12A                                                                       | 0.03595962  | 0.0764281   | 0.566456    | 1.281660602 |
| 1422673_a | PRKCM         | PROTEIN KINASE C, MU                                                                         | 0.03602628  | 0.4704506   | 0.6252391   | 0.7547007   |
| 1455756_a | 730040105R1K  | R1KEN CDNA 730040105 GENE                                                                    | 0.03602223  | 0.05959373  | 0.11718034  | 1.11718034  |
| 1427782_a | Chrl1         | corticotropin releasing hormone receptor 1                                                   | 0.03603002  | 0.763944    | 0.6988662   | 1.29599052  |
| 1429150_a | 1700072M12R1K | R1KEN CDNA 1700072M12 GENE                                                                   | 0.03610848  | 0.9665933   | 0.6728316   | 0.45589803  |
| 1455262_a | TRSD4         | TIROMOSPONDIN, TYPE 1, DOMAIN CONTAINING 4                                                   | 0.03610791  | 0.6239469   | 0.6239469   | 0.84574421  |
| 1425822_a | Rzb1          | ras responsive element binding protein 1                                                     | 0.0362479   | 0.7603489   | 0.9385186   | 0.715456085 |
| 1458052_a | ---           | ---                                                                                          | 0.03626233  | 0.4174777   | 0.7564731   | 1.581509096 |
| 1438338_a | PP2R1B        | PROTEIN PHOSPHATASE 2 (FORMERLY 2A), REGULATORY SUBUNIT A (PP 65), BETA ISOFORM              | 0.03634942  | 0.299423    | 0.6239469   | 0.84574421  |
| 1459544_a | ---           | ---                                                                                          | 0.03636331  | 0.678966    | 0.6784757   | 1.408818325 |
| 1434766_a | PRKAA2        | PROTEIN KINASE, AMP-ACTIVATED, ALPHA 2 CATALYTIC SUBUNIT                                     | 0.03637836  | 0.4511977   | 0.07732672  | 1.09147061  |
| 1453019_a | 2310046A06R1K | R1KEN CDNA 2310046A06 GENE                                                                   | 0.03637836  | 0.4511977   | 0.07732672  | 1.09147061  |
| 1420666_a | Dcs2b         | double C2, beta                                                                              | 0.03642034  | 0.8584059   | 0.4609319   | 0.76038315  |
| 1416118_a | H1FOO         | H1 HISTONE FAMILY MEMBER 0, OOCYTE-SPECIFIC                                                  | 0.03643236  | 0.0784445   | 0.0880129   | 0.386056076 |
| 1428432_a | 2310047A01R1K | R1KEN CDNA 2310047A01 GENE                                                                   | 0.03642416  | 0.2985287   | 1.147426107 | 0.6239469   |
| 1424494_a | 231014712R1K  | R1KEN CDNA 231014712 GENE                                                                    | 0.03644929  | 0.03903093  | 0.288433    | 1.13661596  |
| 1450157_a | 11MMR         | HYALURONAN-MEDIATED MOTILITY RECEPTOR (RHAMM)                                                | 0.03646173  | 0.7022962   | 0.5970584   | 0.443347171 |
| 1441226_a | Spn1          | spn1, (f-spondin) extracellular matrix protein                                               | 0.03646614  | 0.9548653   | 0.280277    | 0.79839379  |
| 1442071_a | ARCF1         | ATP-BINDING CASSETTE, SUB-FAMILY F (OABP), MEMBER 1                                          | 0.03646614  | 0.4797357   | 0.097106    | 0.857173212 |
| 144821_a  | HLRAPP1       | INTERLEUKIN 1 RECEPTOR ACCESSORY PROTEIN-LIKE 1                                              | 0.03646614  | 0.9786167   | 0.7525178   | 0.391979987 |
| 1442923_a | PIK6          | PI3K PROTEIN TYROSINE KINASE 6                                                               | 0.03671299  | 0.836641    | 0.6019147   | 0.2925253   |
| 1422643_a | MOND1         | MONOPYRROXYGENASE, DIBI-LIKE 1                                                               | 0.03672313  | 0.6515107   | 0.789090002 | 0.897860002 |
| 1460302_a | THBS1         | TIROMOSPONDIN                                                                                | 0.03674687  | 0.4013688   | 0.4642201   | 1.901402656 |
| 1429666_a | KCTD16        | POTASSIUM CHANNEL TETRAMERISATION DOMAIN CONTAINING 16                                       | 0.03674742  | 0.1207784   | 0.1430754   | 1.116256474 |
| 1439985_a | ---           | ---                                                                                          | 0.03675854  | 0.883746    | 0.66071072  | 0.856971072 |
| 1460197_a | STEAP1        | STEAP FAMILY MEMBER 4                                                                        | 0.03677358  | 0.06498151  | 0.27279151  | 1.753676511 |
| 1421941_a | Camk4         | calcium/calmodulin-dependent protein kinase IV                                               | 0.03677744  | 0.2216339   | 0.9284385   | 1.267500203 |
| 1417172_a | CYP4B16       | CYTOCHROME P450, FAMILY 4, SUBFAMILY F, POLYPEPTIDE 16                                       | 0.03677744  | 0.5547429   | 0.9284385   | 1.31964586  |
| 1422894_a | SMBT1         | SCM-LIKE WITH FOUR MBT DOMAINS 1                                                             | 0.03683474  | 0.5370218   | 0.3645338   | 1.22904488  |
| 1428721_a | Podag3        | Prostaglandin gamma subfamily 3                                                              | 0.03685041  | 0.9799793   | 0.9199757   | 1.397670722 |
| 1422400_a | SEMA7A        | SEMAPHORIN 7A, IMMUNOGLOBULIN DOMAIN (IG), AND GPI MEMBRANE ANCHOR, (SEMAPHORIN) 7A          | 0.03685238  | 0.03789665  | 0.8073965   | 1.185421562 |
| 1428914_a | 2310014D11R1K | R1KEN CDNA 2310014D11 GENE                                                                   | 0.03685238  | 0.2878318   | 0.3379987   | 0.820183512 |
| 1434594_a | ABD0406       | EXPRESSED SEQUENCE ABD0406                                                                   | 0.03691911  | 0.1422711   | 0.8274741   | 1.65330385  |
| 1425562_a | TRN1          | TRNA-NUCLEOTIDYL TRANSFERASE, CCA-ADDING, 1                                                  | 0.03694246  | 0.1471864   | 0.808259787 | 0.808259787 |
| 1446598_a | PRKCA         | PROTEIN KINASE C, ALPHA                                                                      | 0.03702378  | 0.6925257   | 0.16889369  | 1.223595619 |
| 1422826_a | IGFALS1       | INSULIN-LIKE GROWTH FACTOR BINDING PROTEIN, ACID LABILE SUBUNIT                              | 0.03703573  | 0.2188323   | 0.9495626   | 1.85779073  |
| 1454119_a | 0.03704614    | 0.3820263                                                                                    | 0.03704614  | 0.3820263   | 0.748198267 | 1.147584265 |
| 1444268_a | BC004004      | CDNA SEQUENCE BC004004                                                                       | 0.03706061  | 0.00974454  | 0.2425042   | 1.136044169 |
| 1430280_a | 1810062017R1K | R1KEN CDNA 1810062017 GENE                                                                   | 0.03709001  | 0.4466881   | 0.02523612  | 1.709871694 |
| 1445131_a | C9ORF9        | CHROMOSOME 9 OPEN READING FRAME (ORF) 9                                                      | 0.0371088   | 0.5651119   | 0.5651119   | 0.5651119   |
| 1436366_a | PPP1R15B      | EXPRESSED SEQUENCE A066441                                                                   | 0.03711112  | 0.70897466  | 0.1900014   | 1.151872829 |
| 1419985_a | CDC39         | COILED-COIL DOMAIN CONTAINING 69                                                             | 0.03713158  | 0.4522742   | 0.7518328   | 0.59642924  |
| 1431860_a | ZFP179        | ZINC FINGER PROTEIN 179                                                                      | 0.03714497  | 0.01494007  | 0.911137    | 0.812957323 |
| 1434177_a | CCU1          | CYCLOPHILIN CONVERTING ENZYME 1                                                              | 0.03715499  | 0.000115403 | 0.03646625  | 1.02666625  |
| 1440781_a | BS30007D8R1K  | R1KEN CDNA BS30007D8 GENE                                                                    | 0.03717799  | 0.0580138   | 0.4489302   | 0.634566506 |
| 1434776_a | RRM2B         | RIBONUCLEOTIDE REDUCTASE M2 B (TP53 INDUCIBLE)                                               | 0.03718333  | 0.816184    | 0.271641    | 0.777109586 |
| 1429198_a | 1810009007R1K | R1KEN CDNA 1810009007 GENE                                                                   | 0.03719643  | 0.3801397   | 0.5513009   | 0.897860183 |
| 1421516_a | NRA1A         | NUCLEAR RECEPTOR SUBFAMILY A, GROUP A, MEMBER 1                                              | 0.0372129   | 0.5471959   | 0.1504084   | 0.780758105 |
| 1441272_a | MATR3         | MATRIX 3                                                                                     | 0.03730303  | 0.2373005   | 0.3588338   | 0.864510811 |
| 1426235_a | 473247D19R1K  | R1KEN CDNA 473247D19 GENE                                                                    | 0.03731361  | 0.4974062   | 0.727418875 | 0.860711072 |
| 1425788_a | ECHDC2        | ENOYL COENZYME A HYDRATASE DOMAIN CONTAINING 2                                               | 0.03736113  | 0.0504055   | 0.2722415   | 0.786317941 |
| 1424455_a | C79845        | EXPRESSED SEQUENCE C79845                                                                    | 0.03740399  | 0.4032599   | 0.8347304   | 1.61694247  |
| 1428311_a | ZFP15         | ZINC FINGER PROTEIN 15                                                                       | 0.03740962  | 0.7634538   | 0.54277196  | 0.845277594 |
| 1439713_a | WNT5B         | WINGLESS-RELATED MMTV INTEGRATION SITE 5B                                                    | 0.03747366  | 0.05166941  | 0.6470712   | 1.338324134 |
| 1420585_a | NNT2          | NUCLEAR RNA EXPORT FACTOR 2                                                                  | 0.03754243  | 0.1789662   | 0.7084729   | 0.682293006 |
| 1427242_a | DDNA4         | DEAD (ASP-GLU-ALA-ASP) BOX POLYPEPTIDE 4                                                     | 0.03754455  | 0.01610979  | 0.2324368   | 0.818911522 |
| 1446560_a | Pso23         | protease, serine, 23                                                                         | 0.03759883  | 0.5534879   | 0.82816     | 1.41914799  |
| 1425198_a | FBXJ10        | F-BOX AND LEUCINE-RICH REPEAT FAMILY 10                                                      | 0.03794686  | 0.2330091   | 0.6470039   | 0.863739109 |
| 1454421_a | 0.03804232R1K | R1KEN CDNA 03804232 GENE                                                                     | 0.03796042  | 0.3758068   | 0.185014677 | 1.850146777 |
| 1417289_a | Pknox2        | pleckstrin homology domain-containing, family A (phosphoinositide binding specific) member 2 | 0.03798002  | 1.42174E-07 | 0.2870586   | 0.851321598 |
| 1440360_a | ARL4P5        | ADP-RIBOSYLATION FACTOR-LIKE 5 INTERACTING PROTEIN 5                                         | 0.03798249  | 0.4726207   | 0.5155841   | 0.810384445 |
| 1421817_a | CSR1          | CYCLOPHILIN REDUCTASE 1                                                                      | 0.03797289  | 0.3314454   | 0.6181377   | 1.142396066 |
| 1434948_a | TTCC9         | TETRAHYDROPTERIDE REPEAT DOMAIN 9                                                            | 0.03797607  | 0.2251336   | 0.2689143   | 1.093151992 |
| 1459484_a | Tmem2         | Transmembrane protein 2                                                                      | 0.03777495  | 0.01668189  | 0.1123311   | 0.575460268 |
| 1420625_a | 2310016F19R1K | R1KEN CDNA 2310016F19 GENE                                                                   | 0.03797138  | 0.1953572   | 0.0550196   | 1.123114233 |

|              |               |                                                                                                                                 |            |             |             |             |
|--------------|---------------|---------------------------------------------------------------------------------------------------------------------------------|------------|-------------|-------------|-------------|
| 1421034_u_at | HLRA          | INTERLEUKIN 4 RECEPTOR, ALPHA                                                                                                   | 0.03931418 | 0.1788588   | 0.07024461  | 1.516127539 |
| 1419968_u_at | SGCB          | SARCOGLYCAN, BETA-DYSTRORPHIN-ASSOCIATED GLYCOPROTEIN                                                                           | 0.03933531 | 0.4466463   | 0.3949115   | 0.855701587 |
| 1423798_u_at | SHK1          | SH3-BINDING KINASE 1                                                                                                            | 0.03935352 | 0.114866    | 0.08920523  | 1.454840051 |
| 1424037_u_at | ITPKA         | INOSITOL 1,4,5-TRISPHOSPHATE 3-KINASE A                                                                                         | 0.03933578 | 0.1924209   | 0.9349646   | 1.2366436   |
| 1454043_u_at | MAP2K3        | MITOGEN ACTIVATED PROTEIN KINASE 3                                                                                              | 0.03936924 | 0.6468772   | 0.50154     | 1.732524766 |
| 1451714_u_at | MAP2K3        | MITOGEN ACTIVATED PROTEIN KINASE 3                                                                                              | 0.03941519 | 0.3251309   | 0.217997    | 0.891258977 |
| 1434567_u_at | 4732396080R1K | RIKEN CDNA 473239608 GENE                                                                                                       | 0.03949924 | 0.0796028   | 0.08136688  | 1.174073485 |
| 1417489_u_at | NPY2R         | NEUROPEPTIDE Y RECEPTOR Y2                                                                                                      | 0.03951948 | 0.7731262   | 0.648164398 | 0.823291348 |
| 1460574_u_at | FAT4          | HYPOTHETICAL PROTEIN 9430004M15                                                                                                 | 0.03952528 | 0.00245924  | 0.7554875   | 0.751255622 |
| 1447906_u_at | ---           | ---                                                                                                                             | 0.0395263  | 0.194397    | 0.1423083   | 0.734272357 |
| 1420462_u_at | HLR1AP2L      | INTERLEUKIN 1 RECEPTOR ACCESSORY PROTEIN-LIKE 2                                                                                 | 0.0395757  | 0.1012278   | 0.2740104   | 0.580106922 |
| 1441455_u_at | Appp19        | CAMP-regulated phosphoprotein 19                                                                                                | 0.0395827  | 0.1191993   | 0.64816     | 1.652390838 |
| 1448432_u_at | Picd1         | phospholipase C, delta 1                                                                                                        | 0.0395263  | 0.2054446   | 0.5208841   | 1.359138575 |
| 1448751_u_at | Apo2l2        | adipose-related protein complex 3, mr. 2 subunit                                                                                | 0.03966998 | 0.0462166   | 0.475463    | 1.10401497  |
| 1429794_u_at | PRK11         | PROTEIN KINASE RECEPTOR, PXX, LIGAND-GATED ION CHANNEL, 1                                                                       | 0.0396715  | 0.1781295   | 0.31097     | 0.472264397 |
| 1433992_u_at | APXL          | APICAL PROTEIN, XENOPUS LAEVIS-LIKE                                                                                             | 0.03969003 | 0.1946388   | 0.5230953   | 0.726757697 |
| 1417324_u_at | MAST2         | MICROTUBULE ASSOCIATED SERINE/THREONINE KINASE 2                                                                                | 0.0397151  | 0.2968487   | 0.8987348   | 1.13701176  |
| 1424498_u_at | 573099420R1K  | RIKEN CDNA 463340233 GENE                                                                                                       | 0.03974602 | 0.106677    | 0.992489    | 0.698014684 |
| 1447894_u_at | VPS52         | SAC2 (SUPPRESSOR OF ACTIN MUTATIONS 2, HOMOLOG)-LIKE B, CEREVISIAE                                                              | 0.03981602 | 0.4731191   | 0.7424967   | 0.785808604 |
| 1419507_u_at | KRTAP15       | KERATIN ASSOCIATED PROTEIN 15                                                                                                   | 0.03982942 | 0.04634807  | 0.05978838  | 0.488613138 |
| 1423644_u_at | AC01          | AC01                                                                                                                            | 0.03984307 | 0.0318159   | 0.0518223   | 0.83131189  |
| 1452342_u_at | APBB2         | AMYLOID BETA (A4) PRECURSOR PROTEIN-BINDING, FAMILY B, MEMBER 2                                                                 | 0.03984751 | 0.2654754   | 0.1613914   | 1.126597448 |
| 1437716_u_at | Klf22         | EXPRESSED SEQUENCE AL033113                                                                                                     | 0.03988169 | 0.1096493   | 0.4024961   | 1.153642121 |
| 1458117_u_at | GABR11        | GTPASE ACTIVATING RANGAP-DOMAIN-LIKE 1                                                                                          | 0.03988635 | 0.8037641   | 0.146862    | 0.855721227 |
| 1452199_u_at | 2700094910R1K | RIKEN CDNA 2700094101 GENE                                                                                                      | 0.03988458 | 0.0176538   | 0.2671309   | 0.819719151 |
| 1435727_u_at | D15KRTD366E   | DNA SEGMENT, CHR 15, ERATO DOI 366, EXPRESSED                                                                                   | 0.03991537 | 0.8888887   | 0.7920333   | 0.779962626 |
| 1424525_u_at | 493042021R1K  | RIKEN CDNA 493042021 GENE                                                                                                       | 0.03996978 | 0.1991666   | 0.1599131   | 1.430238734 |
| 1447690_u_at | LSR           | LIPOLYSIS STIMULATED LIPOPROTEIN RECEPTOR                                                                                       | 0.03996314 | 0.1701339   | 0.3768962   | 3.516295004 |
| 142130_u_at  | Tc14          | tetraoctapeptide repeat domain 14                                                                                               | 0.03997319 | 0.0965609   | 0.728671    | 0.821383199 |
| 1446623_u_at | ---           | ---                                                                                                                             | 0.03999678 | 0.1991666   | 0.1599131   | 1.430238734 |
| 1459931_u_at | 2810021G02R1K | RIKEN CDNA 2810021G02 GENE                                                                                                      | 0.04001911 | 0.0421297   | 0.7286052   | 1.191852111 |
| 1445840_u_at | ---           | ---                                                                                                                             | 0.04006027 | 0.6327497   | 0.46489     | 1.959428735 |
| 1432544_u_at | ZADH1         | ZINC BINDING ALCOHOL DEHYDROGENASE, DOMAIN CONTAINING 1                                                                         | 0.04011303 | 0.0884987   | 0.31097     | 0.472264397 |
| 1438982_u_at | 2810417J12R1K | RIKEN CDNA 2810417J12 GENE                                                                                                      | 0.04014717 | 0.02568177  | 0.1671187   | 1.231676117 |
| 1429741_u_at | Kcav1         | potassium channel, subfamily V, member 1                                                                                        | 0.04015715 | 0.4183579   | 0.8531571   | 1.216059089 |
| 1419097_u_at | STOM          | STOMATIN                                                                                                                        | 0.04015716 | 0.07114883  | 0.6884252   | 0.869459492 |
| 1452418_u_at | 220010424R1K  | RIKEN CDNA 1200014624 GENE                                                                                                      | 0.04016549 | 0.04754565  | 0.491458    | 1.212918108 |
| 1432062_u_at | MDGA1         | MAM DOMAIN CONTAINING GLYCOSYLPHOSPHATIDYLINOSITOL ANCHOR 1                                                                     | 0.04016099 | 0.4616441   | 0.8121055   | 0.606368422 |
| 1426015_u_at | Aph           | aspartate-beta-dehydrogenase                                                                                                    | 0.04019006 | 0.08801171  | 0.3184489   | 0.828080232 |
| 1442166_u_at | CPIP5         | CPIP5                                                                                                                           | 0.040204   | 0.0380763   | 0.1982189   | 0.828080232 |
| 1437793_u_at | TNKS2         | TANKYRASE, TRF1-INTERACTING ANKYRIN-RELATED ADP-RIBOSE POLYMERASE 2                                                             | 0.04025739 | 0.1388997   | 0.6028426   | 0.889233955 |
| 1428952_u_at | PDA2          | PROTEIN DISULFIDE ISOMERASE ASSOCIATED 2                                                                                        | 0.04026229 | 0.1635141   | 0.1627749   | 1.380799739 |
| 1421382_u_at | PRK4          | PROLACTIN RECEPTOR RELATED 5                                                                                                    | 0.04024807 | 0.5915604   | 0.1614141   | 1.911971617 |
| 1448923_u_at | PRKRA         | PROTEIN KINASE, INTERFERON INDUCIBLE DOUBLE STRANDED RNA DEPENDENT ACTIVATOR                                                    | 0.04028854 | 0.1230992   | 0.400271    | 0.76732408  |
| 1435980_u_at | WNT6          | WINGLESS-RELATED MMTV INTEGRATION SITE 6                                                                                        | 0.04031214 | 0.4660805   | 0.9399472   | 0.615937145 |
| 1456137_u_at | Nesn3         | neurosin III                                                                                                                    | 0.04033886 | 0.06790557  | 0.1253784   | 1.253784021 |
| 1431040_u_at | LOC638977     | RIKEN CDNA 4930578F06 GENE                                                                                                      | 0.04036721 | 0.2784062   | 0.1471355   | 1.479056006 |
| 1450438_u_at | Ncam1         | neural cell adhesion molecule 1                                                                                                 | 0.04039822 | 0.0995198   | 0.3040202   | 1.830343034 |
| 1429279_u_at | WRAS2         | WRONTOXYANIN, TRICARBYNYLTHIASE 2 (MITOCHONDRIAL)                                                                               | 0.04041123 | 0.5340465   | 0.863626799 | 0.73066195  |
| 1454960_u_at | Smao3         | MAD homolog 3 (Drosophila)                                                                                                      | 0.04041919 | 0.2898554   | 0.2369999   | 1.10400382  |
| 1423705_u_at | 5330428N10R1K | RIKEN CDNA 5330428N10 GENE                                                                                                      | 0.04041486 | 0.03809396  | 0.1810214   | 1.142922803 |
| 1425267_u_at | GCAP3         | GRANULE CELL ANTISENSE POSITIVE 8                                                                                               | 0.04044179 | 0.5644831   | 0.408518086 | 0.815212354 |
| 1454913_u_at | 993104106R1K  | RIKEN CDNA 993104106 GENE                                                                                                       | 0.04050819 | 0.1154806   | 0.8313809   | 0.751606015 |
| 1457936_u_at | MAPK8         | MITOGEN ACTIVATED PROTEIN KINASE 8                                                                                              | 0.04054466 | 0.0430399   | 0.1616713   | 1.048749466 |
| 1442377_u_at | ---           | ---                                                                                                                             | 0.04057586 | 0.94316     | 0.05910881  | 0.732223654 |
| 1446389_u_at | NR1P1         | NUCLEAR RECEPTOR INTERACTING PROTEIN 1                                                                                          | 0.04057891 | 0.5232321   | 0.501798    | 2.054636526 |
| 1458529_u_at | LOC1215714    | HYPOTHETICAL PROTEIN A93001009                                                                                                  | 0.04059732 | 0.451908    | 0.1731718   | 0.622876098 |
| 1460527_u_at | 933040709R1K  | RIKEN CDNA 933040709 GENE                                                                                                       | 0.04059859 | 0.06312508  | 0.99529153  | 1.524127353 |
| 1425646_u_at | BC016495      | CDNA SEQUENCE BC016495                                                                                                          | 0.04064683 | 0.205058    | 0.3137412   | 0.712166534 |
| 1425994_u_at | ASAH2         | N-ACYL SPHINGOSINE AMIDOHYDROLASE                                                                                               | 0.0406955  | 0.0821988   | 0.2652325   | 1.32777286  |
| 1450716_u_at | ADAMTS15      | A DISINTTEGRIN-LIKE AND METALLOPEPTIDASE (REPROLYSIN TYPE) WITH THROMBOSPONDIN TYPE 1 MOTIF, 1                                  | 0.04080299 | 0.6004644   | 0.7021431   | 0.782196531 |
| 1434096_u_at | Srsf4         | serine-arginine family 4 (non-exchange), member 4                                                                               | 0.0408544  | 0.7237648   | 0.904378    | 0.921184106 |
| 1454462_u_at | Adcy2         | adenylyl cyclase 2                                                                                                              | 0.04086269 | 0.0314885   | 0.2318252   | 1.098585642 |
| 1437702_u_at | TGM6          | TRANSGLUTAMINASE 6                                                                                                              | 0.04101383 | 0.8880442   | 0.0641721   | 0.675515231 |
| 1434966_u_at | SPK3          | SPINNING FACTOR, ARGININE/SERINE, MEMBER 3                                                                                      | 0.04102276 | 0.06101382  | 0.040478    | 1.043731878 |
| 1456809_u_at | ---           | ---                                                                                                                             | 0.04102776 | 0.0821696   | 0.8834819   | 0.753301967 |
| 1423968_u_at | UGT3A2        | EXPRESSED SEQUENCE A311915                                                                                                      | 0.04101782 | 0.851254    | 0.111538    | 0.851166759 |
| 1455739_u_at | 643070406     | HYPOTHETICAL PROTEIN 643070406                                                                                                  | 0.04105071 | 0.0389716   | 0.425024    | 0.921448496 |
| 1445029_u_at | A330019N05    | RIKEN CDNA A330019N05 GENE                                                                                                      | 0.0411433  | 0.2619883   | 0.9801267   | 0.745891338 |
| 1441184_u_at | TRPC4AP       | TRANSIENT RECEPTOR POTENTIAL, CATION CHANNEL, SUBFAMILY C, MEMBER 4 ASSOCIATED PROTEIN                                          | 0.04114258 | 0.7423148   | 0.9987994   | 0.446694078 |
| 1456126_u_at | IRAK1         | INTERLEUKIN 1 RECEPTOR ADAPTIN 1                                                                                                | 0.0411667  | 0.4508757   | 0.258126    | 0.82124556  |
| 1448400_u_at | SMAL          | SWI5NF RELATED, MATRIX ASSOCIATED, ACTIN DEPENDENT REGULATOR OF CHROMATIN, SUBFAMILY D, MEMBER 2                                | 0.04117877 | 0.722602    | 0.8008907   | 0.748543363 |
| 1441654_u_at | GNAL2         | GUANINE NUCLEOTIDE BINDING PROTEIN, ALPHA 2                                                                                     | 0.04123801 | 0.0581567   | 0.0584237   | 1.248637523 |
| 1427522_u_at | ARIHAP20      | ARIHAP20                                                                                                                        | 0.04128877 | 0.04164296  | 0.1876341   | 1.09763506  |
| 1444704_u_at | ---           | 7 days neonate cerebellum cDNA, RIKEN full-length enriched library, clone A730905.12 product unclassified, full insert sequence | 0.04133876 | 0.0268393   | 0.4556495   | 1.297322969 |
| 1433071_u_at | 6430605C03R1K | RIKEN CDNA 6430605C03 GENE                                                                                                      | 0.04136794 | 0.1029711   | 0.65154     | 0.471758031 |
| 1448050_u_at | MAPK14        | mitogen-activated protein kinase kinase kinase kinase 14                                                                        | 0.04139973 | 0.2139237   | 0.1461615   | 1.253292968 |
| 1451723_u_at | A530898.17    | HYPOTHETICAL PROTEIN A530898.17                                                                                                 | 0.04139959 | 0.1489666   | 0.3495254   | 0.616080926 |
| 1450096_u_at | GNAL12        | GUANINE NUCLEOTIDE BINDING PROTEIN, ALPHA 12                                                                                    | 0.04144853 | 0.2423687   | 0.09866665  | 0.780896464 |
| 1438375_u_at | Fhlb2         | Fhlb2                                                                                                                           | 0.04145537 | 0.1762177   | 0.07286543  | 1.770728068 |
| 1427950_u_at | ZFP294        | ZINC FINGER PROTEIN 294                                                                                                         | 0.04147355 | 0.01009917  | 0.5858136   | 1.084012291 |
| 1421268_u_at | UGCG          | UDP-GLUCOSE CERAMIDE GLUCOSYLTRANSFERASE                                                                                        | 0.0415474  | 1.604546-06 | 0.1019116   | 1.020211639 |
| 1438018_u_at | Hsok1         | hook homolog 1 (Drosophila)                                                                                                     | 0.04155642 | 0.0953124   | 0.818151827 | 0.818151827 |
| 1454501_u_at | 6130419D04R1K | RIKEN CDNA 6130419D04 GENE                                                                                                      | 0.04160884 | 0.0864558   | 0.3764444   | 0.770386801 |
| 1451727_u_at | UZAF1-RS2     | UZ SMALL NUCLEAR RIBONUCLEOPROTEIN AUXILIARY FACTOR (UZAF1), RELATED SEQUENCE 2                                                 | 0.04163797 | 0.00072388  | 0.6483704   | 0.909664489 |
| 1433590_u_at | HERC3         | HECT DOMAIN AND RLD 3                                                                                                           | 0.04166161 | 0.000199118 | 0.156692    | 0.792673909 |
| 1446121_u_at | B2302080R1K   | RIKEN CDNA B2302080R8 GENE                                                                                                      | 0.04167661 | 0.0495817   | 0.142999172 | 0.820999172 |
| 1425896_u_at | FBN1          | FIBRILLIN 1                                                                                                                     | 0.04171001 | 0.6627323   | 0.7223801   | 0.699771894 |
| 1444498_u_at | C7862         | EST C7862                                                                                                                       | 0.04171729 | 0.2977369   | 0.1682583   | 2.361266577 |
| 1437433_u_at | IRGLAL2       | IRGAP1L-BETA1,CGNAC BETA 1,3-GALACTOSYLTRANSFERASE, POLYPEPTIDE 2                                                               | 0.04171847 | 0.0120931   | 0.5391291   | 0.917312719 |
| 1448551_u_at | TRIM2         | TRIPARTITE MOTIF PROTEIN 2                                                                                                      | 0.04174904 | 2.00516E-11 | 0.4322264   | 0.867132157 |
| 1454355_u_at | 1810021M19R1K | RIKEN CDNA 1810021M19 GENE                                                                                                      | 0.04174979 | 0.6289159   | 0.2434267   | 1.17601755  |
| 1431170_u_at | EPHA3         | EPHRIAN A3                                                                                                                      | 0.04175997 | 0.1981382   | 0.8571144   | 0.910798355 |
| 1446503_u_at | ---           | ---                                                                                                                             | 0.04181307 | 0.9471918   | 0.276065    | 1.682335674 |
| 1455303_u_at | REXAP         | REGULATORY FACTOR-ASSOCIATED PROTEIN                                                                                            | 0.04181397 | 0.068821534 | 0.3389789   | 0.822039135 |
| 1441168_u_at | NYX           | NYCTALOPIN                                                                                                                      | 0.04182056 | 0.7737319   | 0.6212859   | 0.681586621 |
| 1446344_u_at | NYX           | NYCTALOPIN                                                                                                                      | 0.0418372  | 0.02239268  | 0.88287422  | 1.6444147   |
| 1439628_u_at | Rab38         | Rab38, member of RAS oncogene family                                                                                            | 0.04191669 | 0.000288176 | 0.95154     | 1.275517127 |
| 1423062_u_at | GRBPL1        | GRANULE CELL GROWTH FACTOR-BINDING PROTEIN 3                                                                                    | 0.04199732 | 0.619749    | 0.261052224 | 0.827424449 |
| 1420701_u_at | KLK1B1        | KALLIKREIN 1-RELATED PEPTIDASE B1                                                                                               | 0.04204837 | 0.6353504   | 0.9293355   | 0.5300998   |
| 1441859_u_at | ---           | ---                                                                                                                             | 0.04209292 | 0.2575559   | 0.5232095   | 1.70881837  |
| 1430859_u_at | 533042701R1K  | RIKEN CDNA 533042701 GENE                                                                                                       | 0.04209391 | 0.4549421   | 1.383484433 | 0.81834433  |
| 1441866_u_at | SRS10         | SPLICING FACTOR, ARGININE/SERINE-RICH 10 (TRANSFEROR 2 HOMOLOG, DROSOPHILA)                                                     | 0.04207264 | 0.2647683   | 0.7095547   | 0.769696745 |
| 1440918_u_at | RASGRF2       | RAS PROTEIN-SPECIFIC GUANINE NUCLEOTIDE-RELEASING FACTOR 2                                                                      | 0.04212968 | 0.0443666   | 0.4667566   | 0.838757293 |
| 1423796_u_at | PAIP1         | RIKEN CDNA 9330221R1 GENE                                                                                                       | 0.04219889 | 0.6353202   | 0.580878125 | 0.79313205  |
| 1456852_u_at | PAIP1         | POLYADENYLATE BINDING PROTEIN-INTERACTING PROTEIN 1                                                                             | 0.04221872 | 0.1994976   | 0.0842033   | 1.152359626 |
| 1457003_u_at | AW490526      | EXPRESSED SEQUENCE AW490526                                                                                                     | 0.04222431 | 0.1263791   | 0.662518    |             |

|              |                |                                                                                               |            |             |             |              |
|--------------|----------------|-----------------------------------------------------------------------------------------------|------------|-------------|-------------|--------------|
| 1453340_at   | 1700571003RIK  | RIKEN CDNA 1700571003 GENE                                                                    | 0.00394149 | 0.3812653   | 0.2058984   | 0.414545505  |
| 1453533_at   | A93025200RIK   | RIKEN CDNA A93025200 GENE                                                                     | 0.04396134 | 0.5252156   | 0.4906474   | 0.84043505   |
| 1454696_x_at | CEACAM11       | CEA-RELATED CELL ADHESION MOLECULE 11                                                         | 0.04400186 | 0.4751955   | 0.33598     | 0.640467444  |
| 1454908_at   | PAM            | PEPTIDYLGLYCINE ALPHA-AMIDATING MONOOXYGENASE                                                 | 0.04402677 | 0.40497639  | 0.236254    | 1.139251614  |
| 1457375_at   | Ssoad22        | small nuclear RNA, C/D box 22                                                                 | 0.04404044 | 0.05633047  | 0.1061879   | 0.6426963827 |
| 1421718_at   | STRM           | STRIMIN                                                                                       | 0.04404096 | 0.1360005   | 0.1360005   | 1.906304955  |
| 1458448_at   | AA-08296       | EXPRESSED SEQUENCE AA08296                                                                    | 0.04406097 | 0.0361782   | 0.2708608   | 1.611197213  |
| 1453400_at   | KIA04015       | KIA04015 PROTEIN                                                                              | 0.04406097 | 0.5583838   | 0.7208608   | 0.5758398    |
| 1416732_at   | Top2b          | topoisomerase (DNA) II beta                                                                   | 0.04412542 | 0.00034491  | 0.00034491  | 1.131136879  |
| 1424754_at   | MSA47          | MEMBRANE-SPANNING 4-DOMAINS, SUBFAMILY A, MEMBER 7                                            | 0.04417628 | 0.1041287   | 0.1041287   | 1.459673852  |
| 1424704_at   | 2110076703RIK  | RIKEN CDNA 2110076703 GENE                                                                    | 0.04417796 | 0.9592994   | 0.5471479   | 1.196216333  |
| 1444021_at   | D1SERTD466E    | DNA SEGMENT, CHR 15, ERATO D01 466, EXPRESSED                                                 | 0.04418241 | 0.6215904   | 0.6466675   | 2.225239777  |
| 1422065_at   | KLR18D         | KILLER CELL LECTIN-LIKE RECEPTOR SUBFAMILY B MEMBER 18D                                       | 0.04420118 | 0.4678845   | 0.8043314   | 0.413676028  |
| 1429075_x_at | 1700018908RIK  | RIKEN CDNA 1700018908 GENE                                                                    | 0.04420128 | 0.0952888   | 0.09999106  | 1.465612447  |
| 1454943_at   | FXR1P          | FXR INTERACTING (WITH TRANSCRIPTION-ACTIVATION DOMAIN) PROTEIN 1                              | 0.04420184 | 0.7668292   | 0.2096772   | 0.828431917  |
| 1442340_at   | CYR61          | CYSTEINE RICH PROTEIN 61                                                                      | 0.04420472 | 0.5025667   | 0.0661427   | 1.593166018  |
| 1420403_at   | Alp2c2         | Alpase, Ca++ transporting, plasma membrane 2                                                  | 0.04411103 | 0.000151675 | 0.4040829   | 1.159692132  |
| 1425256_at   | LDR2           | LEUCINE-DEPENDENT RECEPTOR 2                                                                  | 0.04434045 | 0.16627379  | 0.16627379  | 1.901229647  |
| 1443623_x_at | 6430571L13RIK  | RIKEN CDNA 6430571L13 GENE                                                                    | 0.04437651 | 0.4886309   | 0.3727287   | 0.461175455  |
| 1425718_at   | EDDI           | EE UBIQUITIN-PROTEIN LIGASE, HECT DOMAIN CONTAINING, 1                                        | 0.04440343 | 0.3397605   | 0.8536469   | 0.878616227  |
| 1442373_at   | EPH3           | EPH RECEPTOR A3                                                                               | 0.04441256 | 0.1228804   | 0.3714249   | 0.818481236  |
| 1447861_x_at | Mgl1           | Myoid oncotic viral integration site-related gene 1                                           | 0.04442718 | 0.04716395  | 0.9700014   | 0.742936229  |
| 1449789_x_at | L1Y664C        | L1Y664C                                                                                       | 0.04443495 | 0.0463636   | 0.3051579   | 1.607712353  |
| 1434626_at   | RPS3D3         | RNA POLYMERASE II POLYMERASE SUBUNIT 3                                                        | 0.04449289 | 0.7156474   | 0.8161527   | 0.844666275  |
| 1445483_at   | ABL2           | V-ABL ONCOGENE, MURINE LEUKEMIA VIRAL ONCOGENE 2 (ARG, ABL2-RELATED GENE)                     | 0.04459949 | 0.00334498  | 0.8121848   | 1.618969934  |
| 1445259_at   | DM2DH          | DIMETHYLGLYCINE DEHYDROGENASE PRECURSOR                                                       | 0.04460209 | 0.1223559   | 0.8094244   | 0.850708223  |
| 1452527_at   | AGR2           | ANTERIOR GRADIENT 2 (XENOPUS LAEVIS)                                                          | 0.04461161 | 0.1902015   | 0.0599241   | 0.620379047  |
| 1455802_x_at | Gls            | Glutaminase                                                                                   | 0.04464285 | 0.58378909  | 0.28307149  | 1.862353568  |
| 1453708_at   | Gls            | Glutaminase                                                                                   | 0.04472765 | 0.2746796   | 0.1833876   | 1.386378376  |
| 1454073_at   | MET3           | METADIN 3                                                                                     | 0.04475449 | 0.7683758   | 0.4723861   | 0.821338229  |
| 1416929_at   | RBM12          | RNA BINDING MOTIF PROTEIN 12                                                                  | 0.04479263 | 0.1158889   | 0.8761251   | 0.793861387  |
| 1433331_at   | C030404M01RIK  | RIKEN CDNA C030404M01 GENE                                                                    | 0.0448101  | 0.408859    | 0.4636006   | 0.509826136  |
| 1418946_at   | STGAL1         | STB BETA-GALACTOSIDASE ALPHA-2,3-SIALYLTRANSFERASE 1                                          | 0.04485729 | 0.6368476   | 0.0812922   | 1.221516983  |
| 1456786_at   | LDR2           | LIM domain binding 2                                                                          | 0.04488264 | 0.2065505   | 0.3486254   | 1.389486674  |
| 1438144_x_at | ATXN2          | ATAXIN 2                                                                                      | 0.04488327 | 0.00265765  | 0.7850621   | 1.32641385   |
| 1443799_at   | PPP1R14C       | PROTEIN PHOSPHATASE 1, REGULATORY (INHIBITOR) SUBUNIT 14C                                     | 0.04491491 | 0.06017621  | 0.3315476   | 0.762256074  |
| 1443402_at   | SAMD8          | STERILE ALPHA MOTIF DOMAIN CONTAINING 8                                                       | 0.04497363 | 0.8634647   | 0.1544643   | 0.9789066272 |
| 1417994_x_at | ACCN1          | AMILORIDE-SENSITIVE CATION CHANNEL 1, NEURONAL (DEGENERIN)                                    | 0.04501307 | 0.7698365   | 0.1251123   | 0.897859495  |
| 1447163_x_at | ---            | ---                                                                                           | 0.04502622 | 0.8648927   | 0.1533985   | 0.97914894   |
| 1435338_at   | 0610030E20RIK  | RIKEN CDNA 0610030E20 GENE                                                                    | 0.04512489 | 0.04349704  | 0.8488425   | 1.1874809525 |
| 1419389_at   | Pde10a         | phosphodiesterase 10A                                                                         | 0.04518683 | 0.1758866   | 0.944667    | 0.830742622  |
| 1444923_at   | ---            | ---                                                                                           | 0.04521419 | 0.4820385   | 0.9738973   | 0.801185762  |
| 1419629_at   | Ehnl2          | ehpelin B2                                                                                    | 0.04527272 | 0.5883859   | 0.52421     | 1.244851349  |
| 1426777_x_at | WASL           | WISKOTT-ALDRICH SYNDROME-LIKE (HUMAN)                                                         | 0.04527822 | 0.1541494   | 0.5351303   | 1.199846242  |
| 1449254_at   | Ecd            | ectodysplasin-A                                                                               | 0.04527922 | 0.2739541   | 0.902095    | 0.610287488  |
| 1434847_at   | CNNM4          | CNNM4                                                                                         | 0.04531581 | 0.50035499  | 0.0969236   | 0.701229648  |
| 1433342_at   | 5730416F02RIK  | RIKEN CDNA 5730416F02 GENE                                                                    | 0.04539249 | 0.7839371   | 0.8433734   | 0.436916786  |
| 1443434_at   | 4932490922RIK  | RIKEN CDNA 4932490922 GENE                                                                    | 0.04540766 | 0.00315226  | 0.8528676   | 0.83661357   |
| 1449248_at   | CLC2           | CHLORIDE CHANNEL 2                                                                            | 0.04548468 | 0.00345307  | 0.11783036  | 1.178303628  |
| 1452329_at   | ADAMTS1        | A DISINTEGRIN-LIKE AND METALLOPEPTIDASE (REPROLYSIN TYPE) WITH THROMBOSPONDIN TYPE 1 MOTIF, 7 | 0.04552291 | 0.4891138   | 0.2196926   | 2.459253156  |
| 1451031_at   | SFRP4          | SECRETED FRIZZLED-RELATED SEQUENCE PROTEIN 4                                                  | 0.0456234  | 0.000376555 | 0.969929    | 1.31423157   |
| 1419332_at   | GFY16          | GDF-LIKE DOMAIN, MULTIPLE 4                                                                   | 0.04564977 | 0.0177253   | 0.6706624   | 0.782462409  |
| 1449541_x_at | 170001014RIK   | RIKEN CDNA 170001014 GENE                                                                     | 0.04568579 | 0.7322593   | 0.6470998   | 0.557580341  |
| 1453512_at   | 5830407P18RIK  | RIKEN CDNA 5830407P18 GENE                                                                    | 0.04570401 | 0.00126377  | 0.9441456   | 1.14675939   |
| 1441034_at   | ---            | ---                                                                                           | 0.04576268 | 0.6848879   | 0.0647996   | 0.655514628  |
| 1443033_at   | RBM14          | RNA BINDING MOTIF PROTEIN 14                                                                  | 0.04578468 | 0.1172059   | 0.26988609  | 0.689114571  |
| 1447371_at   | LOC236469      | SIMILAR TO BLOODHIRSTY                                                                        | 0.04581455 | 0.00211438  | 0.937717    | 1.69501647   |
| 1429053_at   | 1110012H17RIK  | RIKEN CDNA 1110012H17 GENE                                                                    | 0.04588337 | 0.04073824  | 0.144909819 | 0.81829199   |
| 1428617_at   | Hic2c          | hist cell factor 2                                                                            | 0.04600307 | 0.0147336   | 0.6578053   | 0.81269129   |
| 1422634_at   | V502           | V-SET AND IMMUNOGLOBULIN DOMAIN CONTAINING 2                                                  | 0.04601234 | 0.5800509   | 0.6840057   | 2.486208887  |
| 1453708_x_at | GS102          | GLUTATHIONE S-TRANSFERASE OMIKGA 2                                                            | 0.04603536 | 0.8909247   | 0.1453888   | 0.661265066  |
| 1416613_at   | CYP11B1        | CYP11B1 (CYTOCHROME P450, FAMILY 1, SUBFAMILY B, POLYPEPTIDE 1)                               | 0.04608691 | 0.4636559   | 0.52421     | 0.720494486  |
| 1429354_at   | THEM5          | THIOESTERASE SUPERFAMILY MEMBER 5                                                             | 0.0461031  | 0.4232935   | 0.4017412   | 0.584415329  |
| 1433101_at   | 9030419P21RIK  | RIKEN CDNA 9030419P21 GENE                                                                    | 0.0461043  | 0.7815699   | 0.6057721   | 0.832756375  |
| 1436813_at   | KHSRP          | KATY TYPE SPLICING REGULATORY PROTEIN                                                         | 0.04611411 | 0.0159247   | 0.720494486 | 0.720494486  |
| 1443881_x_at | KCTD12         | EXPRESSED SEQUENCE AW38430                                                                    | 0.04611849 | 0.2948588   | 0.602957    | 0.73380117   |
| 1454358_at   | 2900060N12RIK  | RIKEN CDNA 2900060N12 GENE                                                                    | 0.04625799 | 0.8461043   | 0.6296492   | 1.69877042   |
| 1446719_at   | ---            | ---                                                                                           | 0.04630782 | 0.739934    | 0.4206645   | 0.742526265  |
| 1455712_at   | HIST3H2A       | RIKEN CDNA 4930534G0 GENE                                                                     | 0.04631364 | 0.3376052   | 0.4206645   | 0.760406228  |
| 1429987_at   | 9930013L23RIK  | RIKEN CDNA 9930013L23RIK GENE                                                                 | 0.04636711 | 0.4660845   | 0.6262656   | 0.851111349  |
| 1451238_at   | 1810049G20RIK  | RIKEN CDNA 1810049G20RIK GENE                                                                 | 0.04636782 | 0.269915    | 0.3438086   | 0.732474782  |
| 1458878_at   | Ypc1           | Yamaguchi sarcoma viral (y-yes) oncogene homolog 1                                            | 0.04639045 | 0.11578     | 0.8717211   | 0.792759488  |
| 1416498_at   | PPIC           | PEPTIDYL PROLYL ISOMERASE C                                                                   | 0.04639463 | 0.9701804   | 0.9741171   | 0.448498994  |
| 1447200_at   | DTNA           | CRYSTALLIN, ALPHA                                                                             | 0.04641711 | 0.0412488   | 0.8375704   | 0.805292922  |
| 1419005_at   | CRYBB3         | CRYSTALLIN, BETA B3                                                                           | 0.04648035 | 0.06104097  | 0.08921371  | 1.05063191   |
| 1451056_at   | PSM27          | PROTEASOME (PROSOM, MACROPAIN) 26S SUBUNIT, NON-ATPASE, 7                                     | 0.04650313 | 0.54575359  | 0.6749115   | 0.854134078  |
| 1451423_at   | TBC12          | TUBULIN-SPECIFIC CLASP PROTEIN C                                                              | 0.04651124 | 0.002161425 | 0.144838    | 1.074694117  |
| 1420497_at   | CEBZ           | CCAAT-ENHANCER BINDING PROTEIN ZETA                                                           | 0.04657932 | 0.4881159   | 0.3479115   | 1.24066847   |
| 1426885_x_at | CDK2AP1        | CDK2 (CYCLIN-DEPENDENT KINASE 2)-ASSOCIATED PROTEIN 1                                         | 0.04661122 | 0.5255605   | 0.64627209  | 0.20962797   |
| 1459310_at   | ---            | ---                                                                                           | 0.04661764 | 0.3492287   | 0.2010062   | 0.485948003  |
| 1426561_x_at | Npat           | nephronectin                                                                                  | 0.04663603 | 0.0326229   | 0.7304484   | 1.143951501  |
| 1424314_at   | 9130131B05RIK  | RIKEN CDNA 9130131B05 GENE                                                                    | 0.04665068 | 0.2783339   | 0.3251697   | 1.33964723   |
| 1453102_at   | ZZZ3           | Zinc Finger, ZZ Domain Containing 3                                                           | 0.04665573 | 0.1003191   | 0.772762    | 0.744681138  |
| 1447167_at   | AL03314        | EXPRESSED SEQUENCE AL03314                                                                    | 0.04665802 | 0.908217    | 0.1459587   | 0.907475386  |
| 1421036_at   | NPAS2          | NEURONAL PAS DOMAIN PROTEIN 2                                                                 | 0.04667041 | 0.6776079   | 0.9757239   | 1.287757521  |
| 1451339_at   | SULF1          | SULFATE OXIDASE                                                                               | 0.04670969 | 0.06507042  | 0.847835331 | 0.847835331  |
| 1415961_at   | ITMC2          | INTEGRAL MEMBRANE PROTEIN 2C                                                                  | 0.04670984 | 0.07905616  | 0.5419709   | 0.760042279  |
| 1456489_at   | PCF11          | RIKEN CDNA 250000109 GENE                                                                     | 0.04680997 | 0.4813906   | 0.5866207   | 1.192311714  |
| 1450111_at   | STAR2M         | RIKEN CDNA 6423194 GENE                                                                       | 0.04686869 | 0.1601602   | 0.951191    | 1.564894243  |
| 1442918_at   | NAV3           | NEURON NAVIGATOR 3                                                                            | 0.04689345 | 0.02243558  | 0.8423138   | 1.10051406   |
| 1416620_x_at | SCARB1         | SCAVENGER RECEPTOR CLASS B, MEMBER 1                                                          | 0.04689998 | 0.134222    | 0.4987985   | 1.207531578  |
| 1433794_at   | 2104040B12RIK  | RIKEN CDNA 2104040B12 GENE                                                                    | 0.04694537 | 0.07879955  | 0.8543789   | 0.8543789    |
| 1418314_at   | MTF2           | METAL RESPONSE ELEMENT BINDING TRANSCRIPTION FACTOR 2                                         | 0.04696955 | 0.0093346   | 0.7490012   | 1.01930491   |
| 1435741_at   | PDE8B          | PHOSPHODIESTERASE 8B                                                                          | 0.04697406 | 0.7934646   | 0.9400881   | 0.805282769  |
| 1429655_at   | RUDCD1         | NUC DOMAIN CONTAINING 1                                                                       | 0.0469847  | 0.00019674  | 0.8383222   | 0.8383222    |
| 1456842_at   | ---            | ---                                                                                           | 0.04698337 | 0.0703547   | 0.685822    | 0.512122308  |
| 1442252_at   | KIF13A         | KINESIN FAMILY MEMBER 13A                                                                     | 0.04704626 | 0.1204975   | 0.4679884   | 1.2868028    |
| 1453334_at   | B22018A2N24RIK | RIKEN CDNA B22018A2N24RIK GENE                                                                | 0.04706235 | 0.3335182   | 0.855728278 | 0.855728278  |
| 1440393_at   | ODZ2           | ODD OZTEN-M HOMOLOG 2 (DROSOPHILA)                                                            | 0.0470718  | 0.2569302   | 0.5454676   | 2.147812722  |
| 1436865_at   | SLC26A11       | SOLUTE CARRIER FAMILY 26, MEMBER 11                                                           | 0.04711666 | 0.2871879   | 0.1985105   | 0.864494849  |
| 1420066_x_at | G2f40          | CD190 antigen                                                                                 | 0.04715023 | 0.9901607   | 0.4804899   | 0.4804899    |
| 1451863_at   | UTS2R          | UROFENNSIN 2 RECEPTOR                                                                         | 0.04716319 | 0.4020848   | 0.3713586   | 2.023008255  |
| 1448973_at   | SUL1D1         | SULFOTRANSFERASE FAMILY 1D, MEMBER 1                                                          | 0.04721128 | 0.9621293   | 0.666049    | 2.13048765   |
| 1423153_at   | PRKFB          | PROTEIN PHOSPHATASE RELATED PROTEIN B                                                         | 0.04722454 | 0.04834857  | 0.0798614   | 0.843243078  |
| 1451264_at   | PRMD6          | RIKEN CDNA 2601901919 GENE                                                                    | 0.04732376 | 0.0123229   | 0.2099362   | 0.84155069   |
| 1439717_at   | B2304B2M20RIK  | RIKEN CDNA B2304B2M20RIK GENE                                                                 | 0.04737068 | 0.1855939   | 0.1109228   | 1.236562859  |
| 1451241_at   | LAMB1-1        | LAMBIN B1 SUBUNIT 1                                                                           | 0.04737183 | 0.01096234  | 0.1608609   | 0.7235918231 |
| 1424792_at   | RPP49          | RIBONUCLEASE P-40 SUBUNIT (HUMAN)                                                             | 0.04742137 | 0.1592933   | 0.7937312   | 0.812625892  |
| 1427072_at   | STAR2          | START DOMAIN CONTAINING 8                                                                     | 0.04749449 | 0.7165273   | 0.1256604   | 1.159241743  |
| 1423445_at   | 2110016G11RIK  | RIKEN CDNA 2110016G11 GENE                                                                    | 0.04750288 | 0.4992227   | 0.6868409   | 0.517267801  |
| 1434033_at   | Tscl           | transmembrane cell surface type 1 homolog of Drosophila (Egfp)                                | 0.04751332 | 0.2104977   | 0.780466292 | 0.780466292  |
| 1460280_at   | GRAP2          | GRB2-RELATED ADAPTOR PROTEIN 2                                                                | 0.04752155 | 0.9872165   | 0.9675172   | 0.535986028  |
| 1425290_at   | AAS1470        | EST AAS1470                                                                                   | 0.04752478 | 0.6920191   | 0.9442278   | 0.782624645  |
| 1449546_at   | ZFRP17         | ZINC FINGER PROTEIN 617                                                                       | 0.04754155 | 0.061572041 | 0.8537309   | 0.922321291  |
| 1434927_at   | IFSBP7         | HEAT SHOCK PROTEIN FAMILY, MEMBER 7 (CARDIOVASCULAR)                                          | 0.04754859 | 0.6974744   | 0.0527378   | 1.550024372  |
| 1449703_at   | ZFAND2A        | ZINC FINGER, AN1-TYPE DOMAIN 2A                                                               | 0.04760037 | 0.1613036   | 0.5358821   | 1.450077705  |
| 1455791_at   | ---            | ---                                                                                           | 0.04760671 | 0.3971967   | 0.6197135   | 0.53782879   |
| 1442287_at   | ---            | ---                                                                                           | 0.04763797 | 0.0511998   | 0.8620464   | 0.709881818  |
| 1436906_at   | RNF166         | RING FINGER PROTEIN 166                                                                       |            |             |             |              |

|              |               |                                                                    |            |             |            |             |
|--------------|---------------|--------------------------------------------------------------------|------------|-------------|------------|-------------|
| 1420582_at   | CD209E        | CD209E ANTIGEN                                                     | 0.0487239  | 0.5692887   | 0.4050335  | 2.637701798 |
| 1422347_at   | CHEK2         | CHK2 CHECKPOINT HOMOLOG (S. POMBE)                                 | 0.0487558  | 0.1684693   | 0.4513852  | 0.740625663 |
| 1448618_at   | MVP           | MAJOR VAILT PROTEIN                                                | 0.0488269  | 0.2394245   | 0.303222   | 1.225705278 |
| 1441936_x_at | --            | --                                                                 | 0.04885487 | 0.2471208   | 0.8148172  | 0.795712589 |
| 1443164_at   | VPS13D        | VACUOLAR PROTEIN SORTING 13D (YEAST)                               | 0.04885491 | 0.7419631   | 0.4574515  | 1.559262908 |
| 1460399_at   | BC018601      | CDNA SEQUENCE BC018601                                             | 0.04882584 | 0.00475218  | 0.6618422  | 1.190310396 |
| 1422169_a_at | Bdnf          | brain derived neurotrophic factor                                  | 0.04894924 | 0.9389392   | 0.236607   | 1.351794539 |
| 1441806_at   | CID1L         | CHROMOSOMAL HELICASE DNA BINDING PROTEIN L-LIKE                    | 0.04899339 | 0.7018542   | 0.4908076  | 1.647511038 |
| 1449752_at   | SPSB1         | SPLARYANODINE RECEPTOR DOMAIN AND SOCS BOX CONTAINING 1            | 0.0490082  | 0.6756749   | 0.4316653  | 1.503045893 |
| 1440973_at   | LOC552874     | HYPOTHETICAL LOC552874                                             | 0.04902615 | 0.9342804   | 0.2780002  | 1.218307429 |
| 1448069_at   | TM4SF1        | TRANSMEMBRANE 4 SUPERFAMILY MEMBER 1                               | 0.04903619 | 0.7234735   | 0.09881945 | 0.699652631 |
| 1445618_at   | --            | --                                                                 | 0.04909033 | 3.52451E-05 | 0.4813784  | 0.685338676 |
| 1432237_at   | 5730522E02RIK | RIKEN CDNA 5730522E02 GENE                                         | 0.04912053 | 0.3424898   | 0.3537554  | 0.816197829 |
| 1422125_at   | HTR2B         | 5-HYDROXYTRYPTAMINE (SEROTONIN) RECEPTOR 2B                        | 0.04916555 | 0.1237356   | 0.6259502  | 2.206544508 |
| 1446027_at   | --            | --                                                                 | 0.04922584 | 0.0670149   | 0.8714413  | 0.600198594 |
| 1416935_at   | TRPV2         | TRANSIENT RECEPTOR POTENTIAL CATION CHANNEL, SUBFAMILY V, MEMBER 2 | 0.04923812 | 0.4231931   | 0.8176565  | 1.245555723 |
| 1430107_at   | 9230116B18RIK | RIKEN CDNA 9230116B18 GENE                                         | 0.04928557 | 0.3699192   | 0.57312149 | 0.576635568 |
| 1430290_at   | --            | --                                                                 | 0.04928807 | 0.09970136  | 0.05313704 | 3.994704449 |
| 1450472_x_at | Smad3         | MAD homolog 3 (Drosophila)                                         | 0.04934396 | 0.07085675  | 0.4339804  | 1.230677983 |
| 1425149_a_at | PDC1          | PHOSDUCIN-LIKE                                                     | 0.04935565 | 0.002218962 | 0.7099298  | 0.834717191 |
| 1430030_at   | 5330420P16RIK | RIKEN CDNA 5330420P16 GENE                                         | 0.04936672 | 0.8623812   | 0.3006821  | 0.866996475 |
| 1439379_x_at | PRM1          | PROTAMINE 1                                                        | 0.04939434 | 0.1345723   | 0.1793334  | 2.791033024 |
| 1447392_x_at | CPD           | CARBOXYPEPTIDASE D                                                 | 0.04941198 | 0.01261584  | 0.4025655  | 1.154921776 |
| 1428057_x_at | AINAK         | AINAK NUCLEOPROTEIN (DESMOYOKIN)                                   | 0.04944526 | 0.8237613   | 0.5122049  | 0.464858293 |
| 1447578_at   | 1700084J12RIK | RIKEN CDNA 1700084J12 GENE                                         | 0.04944993 | 0.3736071   | 0.08629759 | 0.553433262 |
| 1451971_at   | CUL4A         | RIKEN CDNA 2810470J1 GENE                                          | 0.04949131 | 0.01932693  | 0.9161423  | 0.866998789 |
| 1418164_at   | EPIM          | EPIMORPHIN                                                         | 0.04953017 | 0.2798975   | 0.3302809  | 0.865720462 |
| 1450867_at   | MRPL17        | MITOCHONDRIAL RIBOSOMAL PROTEIN L17                                | 0.04953106 | 0.5281225   | 0.15347259 | 0.862239186 |
| 1424213_at   | UBIAD1        | UBI A PRENYLTRANSFERASE DOMAIN CONTAINING 1                        | 0.04955903 | 0.5533272   | 0.2124688  | 0.917210009 |
| 1438402_at   | 9630050M13RIK | RIKEN CDNA 9630050M13 GENE                                         | 0.04957938 | 0.05830923  | 0.2357729  | 1.142046082 |
| 1441416_at   | INPP4B        | INOSITOL POLYPHOSPHATE-4-PHOSPHATASE, TYPE II                      | 0.04964201 | 0.5307435   | 0.6865671  | 0.603174976 |
| 1430566_at   | 4733401A01RIK | RIKEN CDNA 4733401A01 GENE                                         | 0.04968408 | 0.09466921  | 0.1454461  | 1.226113081 |
| 1418758_x_at | PSCD3         | PLECKSTRIN HOMOMLOGY SECT AND COILED-COIL DOMAINS 3                | 0.04970199 | 0.03614459  | 0.9154211  | 0.841691319 |
| 1424433_at   | TROVE2        | TROVE DOMAIN FAMILY MEMBER 2                                       | 0.04971025 | 0.007593724 | 0.8310785  | 1.373310808 |
| 1443719_x_at | DDX42         | DEAD (ASP-GLU-ALA-ASP) BOX POLYPEPTIDE 42                          | 0.04971952 | 0.004178711 | 0.9446287  | 1.361790863 |
| 1428727_at   | 463142C13RIK  | RIKEN CDNA 463142C13 GENE                                          | 0.04973459 | 0.8813748   | 0.7873255  | 0.822474638 |
| 1437782_at   | Cttnm2        | ctninin associated protein-like 2                                  | 0.04974123 | 0.3792485   | 0.8218268  | 0.725474645 |
| 1457531_a_at | A930017K11RIK | RIKEN CDNA A930017K11 GENE                                         | 0.04986262 | 0.06084651  | 0.4808383  | 0.832359182 |
| 1440412_at   | ICSF4D        | IMMUNOGLOBULIN SUPERFAMILY MEMBER 4                                | 0.04989325 | 1.1910036   | 0.7483153  | 1.545891783 |
| 1423158_at   | AA409587      | EXPRESSED SEQUENCE AA409587                                        | 0.04990148 | 0.00185428  | 0.06778104 | 0.895667064 |
| 1440969_at   | BC030308      | CDNA SEQUENCE BC030308                                             | 0.04997339 | 0.4522375   | 0.3780786  | 1.150506178 |
| 1421243_at   | RNF144        | RING FINGER PROTEIN 144                                            | 0.04999526 | 0.1644724   | 0.3477377  | 1.71022664  |
| 1445625_at   | --            | --                                                                 | 0.0499991  | 0.4763303   | 0.3682932  | 0.552383372 |

# Table S2

| Term                                                                             | Count | Percentage | P-value     |
|----------------------------------------------------------------------------------|-------|------------|-------------|
| <b>Biological Process</b>                                                        |       |            |             |
| cellular physiological process                                                   | 852   | 42.58%     | 1.14E-11    |
| development                                                                      | 213   | 10.64%     | 1.63E-07    |
| protein modification                                                             | 166   | 8.30%      | 3.14E-07    |
| biopolymer modification                                                          | 170   | 8.50%      | 5.21E-07    |
| intracellular signaling cascade                                                  | 112   | 5.60%      | 9.73E-07    |
| protein amino acid phosphorylation                                               | 79    | 3.95%      | 1.26E-06    |
| primary metabolism                                                               | 572   | 28.59%     | 1.65E-06    |
| biopolymer metabolism                                                            | 247   | 12.34%     | 3.72E-06    |
| cell adhesion                                                                    | 74    | 3.70%      | 4.97E-06    |
| metabolism                                                                       | 630   | 31.48%     | 5.56E-06    |
| protein metabolism                                                               | 280   | 13.99%     | 3.23E-05    |
| macromolecule metabolism                                                         | 360   | 17.99%     | 3.45E-05    |
| metal ion transport                                                              | 52    | 2.60%      | 3.55E-05    |
| locomotion                                                                       | 41    | 2.05%      | 5.34E-05    |
| cellular morphogenesis                                                           | 52    | 2.60%      | 8.12E-05    |
| localization of cell                                                             | 40    | 2.00%      | 8.33E-05    |
| cell motility                                                                    | 40    | 2.00%      | 8.33E-05    |
| cellular metabolism                                                              | 593   | 29.59%     | 1.23E-04    |
| cellular protein metabolism                                                      | 261   | 13.04%     | 1.33E-04    |
| cellular macromolecule metabolism                                                | 264   | 13.19%     | 1.38E-04    |
| phosphorylation                                                                  | 80    | 4.00%      | 1.54E-04    |
| localization                                                                     | 280   | 13.99%     | 2.16E-04    |
| ion transport                                                                    | 81    | 4.05%      | 2.26E-04    |
| establishment of localization                                                    | 277   | 13.84%     | 2.76E-04    |
| morphogenesis                                                                    | 42    | 2.10%      | 2.97E-04    |
| phosphorus metabolism                                                            | 91    | 4.55%      | 3.01E-04    |
| phosphate metabolism                                                             | 91    | 4.55%      | 3.01E-04    |
| behavior                                                                         | 36    | 1.80%      | 3.74E-04    |
| vasculature development                                                          | 26    | 1.30%      | 4.62E-04    |
| neuropeptide signaling pathway                                                   | 18    | 0.90%      | 4.65E-04    |
| cellular process                                                                 | 1010  | 50.47%     | 5.21E-04    |
| axonogenesis                                                                     | 22    | 1.10%      | 6.00E-04    |
| axon guidance                                                                    | 15    | 0.75%      | 7.11E-04    |
| second-messenger-mediated signaling                                              | 19    | 0.95%      | 7.39E-04    |
| cell migration                                                                   | 32    | 1.60%      | 8.93E-04    |
| phosphoinositide-mediated signaling                                              | 10    | 0.50%      | 0.001216148 |
| cation transport                                                                 | 57    | 2.85%      | 0.001340741 |
| nervous system development                                                       | 57    | 2.85%      | 0.001840581 |
| system development                                                               | 61    | 3.05%      | 0.001851433 |
| blood vessel development                                                         | 24    | 1.20%      | 0.001858189 |
| positive regulation of lyase activity                                            | 6     | 0.30%      | 0.001965128 |
| adenylate cyclase activation                                                     | 6     | 0.30%      | 0.001965128 |
| positive regulation of cyclase activity                                          | 6     | 0.30%      | 0.001965128 |
| regulation of adenylate cyclase activity                                         | 6     | 0.30%      | 0.001965128 |
| positive regulation of adenylate cyclase activity                                | 6     | 0.30%      | 0.001965128 |
| cell differentiation                                                             | 92    | 4.60%      | 0.002102036 |
| locomotor behavior                                                               | 24    | 1.20%      | 0.002582194 |
| regulation of biological process                                                 | 298   | 14.89%     | 0.002813205 |
| blood vessel morphogenesis                                                       | 21    | 1.05%      | 0.003406136 |
| cell ion homeostasis                                                             | 17    | 0.85%      | 0.003609544 |
| potassium ion transport                                                          | 23    | 1.15%      | 0.003718339 |
| positive regulation of biological process                                        | 72    | 3.60%      | 0.003957223 |
| regulation of cyclase activity                                                   | 6     | 0.30%      | 0.00403197  |
| regulation of lyase activity                                                     | 6     | 0.30%      | 0.00403197  |
| cation homeostasis                                                               | 16    | 0.80%      | 0.004394293 |
| synaptic transmission                                                            | 22    | 1.10%      | 0.004928679 |
| neuron morphogenesis during differentiation                                      | 22    | 1.10%      | 0.005325219 |
| neurite morphogenesis                                                            | 22    | 1.10%      | 0.005325219 |
| cellular morphogenesis during differentiation                                    | 24    | 1.20%      | 0.005533013 |
| metal ion homeostasis                                                            | 15    | 0.75%      | 0.005938089 |
| positive regulation of cell differentiation                                      | 11    | 0.55%      | 0.00613525  |
| G-protein signaling, coupled to IP3 second messenger (phospholipase C activator) | 9     | 0.45%      | 0.006348302 |
| organ development                                                                | 93    | 4.65%      | 0.00640895  |
| glycoprotein metabolism                                                          | 17    | 0.85%      | 0.007055098 |
| glutamine metabolism                                                             | 5     | 0.25%      | 0.00720438  |
| endothelial cell differentiation                                                 | 5     | 0.25%      | 0.00720438  |
| positive regulation of positive chemotaxis                                       | 4     | 0.20%      | 0.007439389 |
| induction of positive chemotaxis                                                 | 4     | 0.20%      | 0.007439389 |
| regulation of chemotaxis                                                         | 4     | 0.20%      | 0.007439389 |
| positive regulation of chemotaxis                                                | 4     | 0.20%      | 0.007439389 |
| regulation of positive chemotaxis                                                | 4     | 0.20%      | 0.007439389 |
| positive chemotaxis                                                              | 4     | 0.20%      | 0.007439389 |
| transmission of nerve impulse                                                    | 24    | 1.20%      | 0.00836101  |
| cell homeostasis                                                                 | 19    | 0.95%      | 0.008425675 |
| ion homeostasis                                                                  | 18    | 0.90%      | 0.008616173 |
| cell development                                                                 | 36    | 1.80%      | 0.009283267 |
| feeding behavior                                                                 | 7     | 0.35%      | 0.009794733 |
| cell-cell signaling                                                              | 32    | 1.60%      | 0.010286953 |
| glycoprotein biosynthesis                                                        | 15    | 0.75%      | 0.010658793 |
| regulation of development                                                        | 24    | 1.20%      | 0.011532122 |
| angiogenesis                                                                     | 17    | 0.85%      | 0.011771439 |
| protein amino acid glycosylation                                                 | 14    | 0.70%      | 0.011948245 |
| sensory perception of pain                                                       | 5     | 0.25%      | 0.01380451  |
| transport                                                                        | 239   | 11.94%     | 0.01422248  |
| G-protein signaling, adenylate cyclase activating pathway                        | 7     | 0.35%      | 0.014370585 |
| positive regulation of enzyme activity                                           | 16    | 0.80%      | 0.014507494 |
| positive regulation of development                                               | 12    | 0.60%      | 0.014830012 |
| neuron development                                                               | 24    | 1.20%      | 0.016541785 |
| biopolymer glycosylation                                                         | 14    | 0.70%      | 0.018733563 |
| regulation of cell differentiation                                               | 19    | 0.95%      | 0.018787525 |
| regulation of enzyme activity                                                    | 23    | 1.15%      | 0.02087568  |
| glutamine family amino acid metabolism                                           | 7     | 0.35%      | 0.020253167 |
| di-, tri-valent inorganic cation homeostasis                                     | 13    | 0.65%      | 0.021255789 |
| regulation of cell shape                                                         | 9     | 0.45%      | 0.024536457 |
| monovalent inorganic cation transport                                            | 34    | 1.70%      | 0.025323587 |
| muscle development                                                               | 15    | 0.75%      | 0.028398115 |
| regulation of cellular process                                                   | 266   | 13.29%     | 0.029469295 |
| L-glutamate transport                                                            | 3     | 0.15%      | 0.031670461 |
| determination of left/right symmetry                                             | 6     | 0.30%      | 0.032228758 |
| calcium ion homeostasis                                                          | 9     | 0.45%      | 0.034300203 |
| positive regulation of myeloid cell differentiation                              | 4     | 0.20%      | 0.035439407 |
| L-amino acid transport                                                           | 5     | 0.25%      | 0.036021384 |
| determination of symmetry                                                        | 6     | 0.30%      | 0.037837265 |
| determination of bilateral symmetry                                              | 6     | 0.30%      | 0.037837265 |
| muscle contraction                                                               | 11    | 0.55%      | 0.038962737 |
| organ morphogenesis                                                              | 49    | 2.45%      | 0.040427467 |
| homeostasis                                                                      | 24    | 1.20%      | 0.042172623 |
| cAMP-mediated signaling                                                          | 8     | 0.40%      | 0.0474288   |
| regulation of physiological process                                              | 260   | 12.99%     | 0.048956065 |
| cell-cell adhesion                                                               | 20    | 1.00%      | 0.049323667 |
| glycine catabolism                                                               | 3     | 0.15%      | 0.049822082 |
| acidic amino acid transport                                                      | 3     | 0.15%      | 0.049822082 |
| dendritic cell differentiation                                                   | 3     | 0.15%      | 0.049822082 |
| dendritic cell activation                                                        | 3     | 0.15%      | 0.049822082 |

| Term                                           | Count | Percentage | P-value     |
|------------------------------------------------|-------|------------|-------------|
| <b>Cellular component</b>                      |       |            |             |
| intracellular                                  | 645   | 32.23%     | 5.92E-06    |
| chromatin                                      | 24    | 1.20%      | 2.03E-04    |
| nucleus                                        | 325   | 16.24%     | 8.29E-04    |
| membrane fraction                              | 46    | 2.30%      | 0.002597032 |
| chromosome                                     | 36    | 1.80%      | 0.002609631 |
| cell fraction                                  | 49    | 2.45%      | 0.005004769 |
| intracellular organelle                        | 530   | 26.49%     | 0.005196371 |
| organelle                                      | 530   | 26.49%     | 0.005907698 |
| apicolateral plasma membrane                   | 14    | 0.70%      | 0.006193355 |
| apical junction complex                        | 14    | 0.70%      | 0.006193355 |
| intracellular membrane-bound organelle         | 465   | 23.24%     | 0.010257364 |
| membrane-bound organelle                       | 465   | 23.24%     | 0.011447643 |
| microtubule cytoskeleton                       | 32    | 1.60%      | 0.011999726 |
| extracellular matrix                           | 32    | 1.60%      | 0.015276231 |
| nuclear envelope-endoplasmic reticulum network | 13    | 0.65%      | 0.015501046 |
| cytoplasm                                      | 290   | 14.49%     | 0.021446215 |
| cell junction                                  | 22    | 1.10%      | 0.028921266 |
| endoplasmic reticulum membrane                 | 12    | 0.60%      | 0.02778193  |
| synapse                                        | 19    | 0.95%      | 0.029746707 |
| intercellular junction                         | 18    | 0.90%      | 0.03254508  |
| extracellular matrix (sensu Metazoa)           | 30    | 1.50%      | 0.034195217 |
| endomembrane system                            | 33    | 1.65%      | 0.03604724  |
| tight junction                                 | 10    | 0.50%      | 0.047964206 |

| Term                                                                            | Count | Percentage | P-value     |
|---------------------------------------------------------------------------------|-------|------------|-------------|
| <b>Molecular function</b>                                                       |       |            |             |
| metal ion binding                                                               | 332   | 16.59%     | 3.19E-12    |
| ion binding                                                                     | 332   | 16.59%     | 3.19E-12    |
| binding                                                                         | 922   | 46.08%     | 1.57E-11    |
| protein binding                                                                 | 401   | 20.04%     | 1.59E-11    |
| cation binding                                                                  | 307   | 15.34%     | 5.50E-11    |
| calcium ion binding                                                             | 107   | 5.35%      | 3.19E-09    |
| nucleotide binding                                                              | 200   | 10.00%     | 5.45E-09    |
| purine nucleotide binding                                                       | 178   | 8.90%      | 2.01E-08    |
| catalytic activity                                                              | 482   | 24.09%     | 3.18E-08    |
| adenyl nucleotide binding                                                       | 149   | 7.45%      | 4.69E-08    |
| protein serine/threonine kinase activity                                        | 71    | 3.55%      | 6.81E-08    |
| phosphotransferase activity, alcohol group as acceptor                          | 93    | 4.65%      | 7.95E-08    |
| ATP binding                                                                     | 144   | 7.20%      | 9.01E-08    |
| protein kinase activity                                                         | 83    | 4.15%      | 9.42E-08    |
| transferase activity                                                            | 193   | 9.65%      | 1.71E-07    |
| kinase activity                                                                 | 111   | 5.55%      | 5.42E-07    |
| protein-tyrosine kinase activity                                                | 50    | 2.50%      | 2.14E-06    |
| ion channel activity                                                            | 51    | 2.55%      | 5.88E-06    |
| transferase activity, transferring phosphorus-containing groups                 | 118   | 5.90%      | 8.96E-06    |
| GTPase regulator activity                                                       | 41    | 2.05%      | 1.50E-05    |
| MAP kinase activity                                                             | 8     | 0.40%      | 2.22E-05    |
| alpha-type channel activity                                                     | 51    | 2.55%      | 5.91E-05    |
| channel or pore class transporter activity                                      | 51    | 2.55%      | 2.18E-04    |
| voltage-gated ion channel activity                                              | 26    | 1.30%      | 2.30E-04    |
| small GTPase regulator activity                                                 | 27    | 1.35%      | 5.06E-04    |
| GTPase activity                                                                 | 21    | 1.05%      | 5.69E-04    |
| enzyme activator activity                                                       | 27    | 1.35%      | 7.11E-04    |
| enzyme regulator activity                                                       | 67    | 3.35%      | 8.41E-04    |
| GTPase activator activity                                                       | 21    | 1.05%      | 0.001155503 |
| identical protein binding                                                       | 23    | 1.15%      | 0.001159824 |
| growth factor binding                                                           | 11    | 0.55%      | 0.001166443 |
| transition metal ion binding                                                    | 190   | 9.50%      | 0.001706054 |
| protein dimerization activity                                                   | 23    | 1.15%      | 0.00312798  |
| zinc ion binding                                                                | 155   | 7.75%      | 0.003208255 |
| hydrolase activity                                                              | 190   | 9.50%      | 0.004106437 |
| nucleic acid binding                                                            | 268   | 13.39%     | 0.004154899 |
| guanyl-nucleotide exchange factor activity                                      | 18    | 0.90%      | 0.004419441 |
| UDP-galactose:beta-N-acetylglucosamine beta-1,3-galactosyltransferase activity  | 4     | 0.20%      | 0.006391092 |
| calmodulin binding                                                              | 16    | 0.80%      | 0.007081357 |
| ion transporter activity                                                        | 72    | 3.60%      | 0.007135401 |
| alkali metal ion binding                                                        | 21    | 1.05%      | 0.0077174   |
| kinase regulator activity                                                       | 13    | 0.65%      | 0.0080787   |
| cAMP-dependent protein kinase activity                                          | 21    | 1.05%      | 0.010154351 |
| cyclic nucleotide-dependent protein kinase activity                             | 21    | 1.05%      | 0.010154351 |
| beta-1,3-galactosyltransferase activity                                         | 4     | 0.20%      | 0.010586056 |
| protein kinase CK2 activity                                                     | 21    | 1.05%      | 0.010851123 |
| transcription factor binding                                                    | 23    | 1.15%      | 0.01295359  |
| insulin-like growth factor binding                                              | 6     | 0.30%      | 0.015050779 |
| protein homodimerization activity                                               | 12    | 0.60%      | 0.016871587 |
| potassium ion binding                                                           | 14    | 0.70%      | 0.017554617 |
| galactosyltransferase activity                                                  | 7     | 0.35%      | 0.021805542 |
| cytoskeletal protein binding                                                    | 35    | 1.75%      | 0.023601126 |
| transferase activity, transferring glycosyl groups                              | 26    | 1.30%      | 0.024534485 |
| transferase activity, transferring one-carbon groups                            | 20    | 1.00%      | 0.025078598 |
| neurotransmitter receptor activity                                              | 14    | 0.70%      | 0.027898329 |
| neurotransmitter binding                                                        | 14    | 0.70%      | 0.027898329 |
| RNA binding                                                                     | 48    | 2.40%      | 0.029316354 |
| hydrolase activity, acting on acid anhydrides, in phosphorus-containing anhydri | 49    | 2.45%      | 0.030172284 |
| hydrolase activity, acting on acid anhydrides                                   | 49    | 2.45%      | 0.03338244  |
| DNA binding                                                                     | 160   | 8.00%      | 0.034344446 |
| transferase activity, transferring hexosyl groups                               | 18    | 0.90%      | 0.036821029 |
| pyrophosphatase activity                                                        | 19    | 0.95%      | 0.03882894  |
| pyrophosphatase activity                                                        | 48    | 2.40%      | 0.039010075 |
| exonuclease activity                                                            | 9     | 0.45%      | 0.039115199 |
| transporter activity                                                            | 130   | 6.50%      | 0.03939801  |
| protein kinase regulator activity                                               | 10    | 0.50%      | 0.03986377  |
| extracellular matrix structural constituent                                     | 10    | 0.50%      | 0.03986377  |
| lipid binding                                                                   | 25    | 1.25%      | 0.041043297 |
| aminomethyltransferase activity                                                 | 3     | 0.15%      | 0.04511114  |
| peptide YY receptor activity                                                    | 3     | 0.15%      | 0.04511114  |
| UDP-glycosyltransferase activity                                                | 12    | 0.60%      | 0.045306344 |
| GTP binding                                                                     | 33    | 1.65%      | 0.046853032 |



# Table S3

| Donor ID | CNS-related illness      | Death Cause                      | Gender | Age | Cluster |
|----------|--------------------------|----------------------------------|--------|-----|---------|
| #1       | NONE                     | PNEUMONIA                        | FEMALE | 79  | A       |
| #2       | NONE                     | PNEUMONIA                        | MALE   | 79  | A       |
| #3       | NONE                     | MYOCARDIAL INFARCTION            | MALE   | 90< | A       |
| #4       | NONE                     | CARDIAC ARREST                   | FEMALE | 90< | A       |
| #5       | NONE                     | UNKNOWN                          | MALE   | 43  | B       |
| #6       | NONE                     | CONGESTIVE CARDIOMYOPATHY        | FEMALE | 36  | A       |
| #7       | NONE                     | CARDIORESPIRATORY FAILURE        | FEMALE | 90< | B       |
| #8       | NONE                     | CARDIORESPIRATORY FAILURE        | FEMALE | 90  | B       |
| #9       | NONE                     | CARDIORESPIRATORY FAILURE        | MALE   | 75  | A       |
| #10      | NONE                     | MYOCARDIAL INFARCTION            | FEMALE | 85  | B       |
| #11      | NONE                     | CARDIAC ARREST                   | FEMALE | 86  | A       |
| #12      | NONE                     | ACUTE RESPIRATORY INSUFFICIENCY  | FEMALE | 90< | A       |
| #13      | NONE                     | CHRONIC RENAL FAILURE            | FEMALE | 83  | B       |
| #14      | NONE                     | CARDIAC ARREST                   | MALE   | 53  | A       |
| #15      | NONE                     | LUNG CANCER                      | FEMALE | 87  | B       |
| #16      | NONE                     | MOTOR VEHICLE ACCIDENT           | MALE   | 28  | A       |
| #17      | NONE                     | MYOCARDIAL INFARCTION            | MALE   | 41  | A       |
| #18      | NONE                     | MOTOR VEHICLE ACCIDENT           | MALE   | 31  | A       |
| #19      | NONE                     | CARDIAC ARREST                   | MALE   | 27  | A       |
| #20      | NONE                     | CHRONIC OBSTRUCTIVE LUNG DISEASE | FEMALE | 87  | A       |
| #21      | NONE                     | TRAUMA                           | MALE   | 29  | A       |
| #22      | NONE                     | GUNSHOT WOUND TO CHEST           | MALE   | 22  | A       |
| #23      | NONE                     | MULTIPLE GUNSHOT WOUND           | MALE   | 20  | A       |
| #24      | NONE                     | MOTOR VEHICLE ACCIDENT           | MALE   | 70  | B       |
| #25      | NONE                     | CARDIAC ARREST                   | MALE   | 90< | B       |
| #26      | NONE                     | CARDIAC ARREST                   | FEMALE | 89  | B       |
| #27      | NONE                     | CARDIAC ARREST                   | MALE   | 66  | B       |
| #28      | NONE                     | CARDIAC ARREST                   | MALE   | 69  | B       |
| #29      | NONE                     | CARDIAC ARREST                   | MALE   | 74  | B       |
| #30      | NONE                     | CARDIAC ARRHYTHMIA               | MALE   | 39  | A       |
| #31      | NONE                     | MULTIPLE GUNSHOT WOUND           | MALE   | 20  | A       |
| #32      | NONE                     | MALIGNANT MELANOMA               | FEMALE | 85  | A       |
| #33      | NONE                     | ASTHMA                           | MALE   | 34  | A       |
| #34      | NONE                     | CARDIAC ARRHYTHMIA               | MALE   | 26  | A       |
| #35      | NONE                     | GUNSHOT WOUND                    | FEMALE | 24  | A       |
| #36      | NONE                     | MYOCARDIAL INFARCTION            | MALE   | 52  | A       |
| #37      | NONE                     | MYOCARDIAL INFARCTION            | MALE   | 41  | A       |
| #38      | NONE                     | MYOCARDIAL INFARCTION            | MALE   | 44  | A       |
| #39      | NONE                     | CARDIAC ARREST                   | FEMALE | 89  | B       |
| #40      | NONE                     | CARDIAC ARREST                   | FEMALE | 90< | A       |
| #41      | NONE                     | ACUTE RESPIRATORY INSUFFICIENCY  | MALE   | 90  | A       |
| #42      | NONE                     | MYELODYSPLASTIC SYNDROME         | MALE   | 90  | B       |
| #43      | NONE                     | CARDIAC ARREST                   | FEMALE | 85  | A       |
| #44      | NONE                     | CARDIAC ARREST                   | FEMALE | 82  | A       |
| #45      | Schizophrenia            | CARDIORESPIRATORY FAILURE        | MALE   | 84  | B       |
| #46      | Schizophrenia            | CARDIORESPIRATORY FAILURE        | MALE   | 87  | B       |
| #47      | Schizophrenia            | CARDIORESPIRATORY FAILURE        | MALE   | 73  | B       |
| #48      | Schizophrenia            | CARDIORESPIRATORY FAILURE        | MALE   | 66  | B       |
| #49      | Schizophrenia            | CARDIORESPIRATORY FAILURE        | MALE   | 90< | B       |
| #50      | Schizophrenia            | CARDIORESPIRATORY FAILURE        | MALE   | 66  | B       |
| #51      | Schizophrenia            | CARDIAC FAILURE                  | MALE   | 82  | B       |
| #52      | Schizophrenia            | CARDIORESPIRATORY FAILURE        | FEMALE | 74  | B       |
| #53      | Schizophrenia            | SUICIDE BY HANGING               | FEMALE | 39  | A       |
| #54      | Schizophrenia            | ACUTE RESPIRATORY INSUFFICIENCY  | MALE   | 40  | B       |
| #55      | Schizophrenia            | CARDIORESPIRATORY FAILURE        | MALE   | 79  | B       |
| #56      | Schizophrenia            | CORONARY ARTERY DISEASE          | FEMALE | 65  | B       |
| #57      | Schizophrenia            | CARDIAC ARREST                   | MALE   | 57  | B       |
| #58      | Schizophrenia            | CARDIORESPIRATORY FAILURE        | MALE   | 82  | B       |
| #59      | Schizophrenia            | CARDIORESPIRATORY FAILURE        | FEMALE | 90  | B       |
| #60      | Schizophrenia            | SUICIDE                          | MALE   | 30  | B       |
| #61      | Schizophrenia            | CARDIORESPIRATORY FAILURE        | MALE   | 73  | B       |
| #62      | Schizophrenia            | SUICIDE BY HANGING               | MALE   | 29  | A       |
| #63      | Schizoaffective disorder | SUICIDE                          | MALE   | 18  | B       |
| #64      | Bipolar disorder         | SUICIDE BY HANGING               | MALE   | 34  | B       |
| #65      | Bipolar disorder         | SUICIDE BY DRUG OVERDOSE         | MALE   | 24  | B       |

# Table S4

| Mouse Affimetrix probes | Corresponding mouse genes                                   | Human orthologues | Human Affimetrix probes | % P flag in 166 human hippocampal data in BioExpress | F value for specific 21 psychiatric patients |
|-------------------------|-------------------------------------------------------------|-------------------|-------------------------|------------------------------------------------------|----------------------------------------------|
| 1454653_at              | RIKEN cDNA A730016F12 gene                                  | LOC151835         | 239139_at               | 92.17                                                | 11.816                                       |
| 1417420_at              | cyclin D1                                                   | CCND1             | 208712_at               | 52.41                                                | 7.9104                                       |
| 1441634_at              | netrin G1                                                   | NTNG1             | 236088_at               | 23.49                                                | 6.6809                                       |
| 1419093_at              | tryptophan 2,3-dioxygenase                                  | TDO2              | 205943_at               | 52.41                                                | 4.8376                                       |
| 1416266_at              | prodynorphin                                                | PDYN              | 206803_at               | 40.36                                                | 4.1403                                       |
| 1444298_at              | RIKEN cDNA A130090K04 gene                                  | PIP3-E            | 214735_at               | 75.3                                                 | 4.0516                                       |
| 1422711_a_at            | pregnancy upregulated non-ubiquitously expressed CaM kinase | PNCK              | 229411_at               | 28.92                                                | 3.7059                                       |
| 1418754_at              | adenylate cyclase 8                                         | ADCY8             | 206811_at               | 90.96                                                | 3.4637                                       |
| 1437865_at              | spermatogenesis associated 13                               | SPATA13           | 225564_at               | 96.99                                                | 2.9952                                       |
| 1428809_at              | RIKEN cDNA 1810010H24 gene                                  | LOC284018         | 226901_at               | 87.35                                                | 2.7169                                       |

# Table S5

A

| SNP ID <sup>a</sup> | position <sup>b</sup> | MAF <sup>c</sup> (%) | phenotype <sup>d</sup> | Nnnumber | genotype <sup>e</sup> |     |     | P-value       |               |                |
|---------------------|-----------------------|----------------------|------------------------|----------|-----------------------|-----|-----|---------------|---------------|----------------|
|                     |                       |                      |                        |          | M/M                   | M/m | m/m | genotype      | allele        |                |
| 1 rs1432832         | 1                     | 17.2                 | SCZ                    | 376      | 201                   | 145 | 30  | 0.507         | 0.344         |                |
|                     |                       |                      |                        |          | 115                   | 70  | 38  | 7             | 0.759         | 0.451          |
|                     |                       |                      |                        |          | 347                   | 200 | 120 | 27            |               |                |
| 2 rs873593          | 4071                  | 0.8                  | BP                     | 376      | 123                   | 176 | 77  | <b>0.0263</b> | <b>0.0321</b> |                |
|                     |                       |                      |                        |          | 111                   | 27  | 64  | 20            | 0.0524        | <b>0.0243</b>  |
|                     |                       |                      |                        |          | 346                   | 126 | 175 | 45            |               |                |
| 3 rs919740          | 7693                  | 41.4                 | SCZ                    | 376      | 123                   | 176 | 77  | <b>0.0263</b> | <b>0.0321</b> |                |
|                     |                       |                      |                        |          | 111                   | 27  | 64  | 20            | 0.0524        | <b>0.0243</b>  |
|                     |                       |                      |                        |          | 346                   | 126 | 175 | 45            |               |                |
| 4 rs1432833         | 12389                 | 47.7                 | BP                     | 376      | 123                   | 176 | 77  | 0.789         | 0.526         |                |
|                     |                       |                      |                        |          | 115                   | 36  | 60  | 19            | 0.445         | 0.694          |
|                     |                       |                      |                        |          | 347                   | 114 | 160 | 73            |               |                |
| 5 rs9686770         | 15341                 | 44.5                 | SCZ                    | 377      | 133                   | 168 | 76  | 0.789         | 0.526         |                |
|                     |                       |                      |                        |          | 115                   | 36  | 60  | 19            | 0.445         | 0.694          |
|                     |                       |                      |                        |          | 347                   | 114 | 160 | 73            |               |                |
| 6 rs3797616         | 20538                 | 7.0                  | BP                     | 377      | 182                   | 156 | 39  | 0.233         | 0.630         |                |
|                     |                       |                      |                        |          | 115                   | 54  | 49  | 12            | 0.609         | 0.630          |
|                     |                       |                      |                        |          | 343                   | 151 | 163 | 29            |               |                |
| 7 rs874084          | 22712                 | 29.7                 | SCZ                    | 377      | 182                   | 156 | 39  | 0.233         | 0.630         |                |
|                     |                       |                      |                        |          | 115                   | 54  | 49  | 12            | 0.609         | 0.630          |
|                     |                       |                      |                        |          | 343                   | 151 | 163 | 29            |               |                |
| 8 rs2304042         | 28735                 | 28.9                 | SCZ                    | 376      | 192                   | 150 | 34  | 0.574         | 0.847         |                |
|                     |                       |                      |                        |          | 115                   | 46  | 57  | 12            | 0.141         | 0.0556         |
|                     |                       |                      |                        |          | 347                   | 174 | 148 | 25            |               |                |
| 9 rs3822606         | 32387                 | 28.9                 | BP                     | 376      | 178                   | 154 | 46  | 0.774         | 0.544         |                |
|                     |                       |                      |                        |          | 115                   | 59  | 46  | 10            | 0.798         | 0.502          |
|                     |                       |                      |                        |          | 343                   | 166 | 141 | 36            |               |                |
| 10 rs4958445        | 35182                 | 29.7                 | CON                    | 376      | 178                   | 154 | 46  | 0.774         | 0.544         |                |
|                     |                       |                      |                        |          | 115                   | 59  | 46  | 10            | 0.798         | 0.502          |
|                     |                       |                      |                        |          | 343                   | 166 | 141 | 36            |               |                |
| 11 rs3776824        | 36931                 | 30.5                 | SCZ                    | 378      | 178                   | 154 | 46  | 0.774         | 0.544         |                |
|                     |                       |                      |                        |          | 115                   | 59  | 46  | 10            | 0.798         | 0.502          |
|                     |                       |                      |                        |          | 343                   | 166 | 141 | 36            |               |                |
| 12 rs10463294       | 37433                 | 0                    | BP                     | 376      | 147                   | 174 | 55  | 0.696         | 0.391         |                |
|                     |                       |                      |                        |          | 115                   | 48  | 56  | 11            | 0.592         | 0.644          |
|                     |                       |                      |                        |          | 347                   | 145 | 157 | 45            |               |                |
| 13 rs10463293       | 37469                 | 39.8                 | CON                    | 376      | 147                   | 174 | 55  | 0.696         | 0.391         |                |
|                     |                       |                      |                        |          | 115                   | 48  | 56  | 11            | 0.592         | 0.644          |
|                     |                       |                      |                        |          | 347                   | 145 | 157 | 45            |               |                |
| 14 rs880100         | 38185                 | 0                    | SCZ                    | 378      | 178                   | 154 | 46  | 0.774         | 0.544         |                |
|                     |                       |                      |                        |          | 115                   | 59  | 46  | 10            | 0.798         | 0.502          |
|                     |                       |                      |                        |          | 343                   | 166 | 141 | 36            |               |                |
| 15 rs2288799        | 42129                 | 36.7                 | BP                     | 376      | 147                   | 174 | 55  | 0.696         | 0.391         |                |
|                     |                       |                      |                        |          | 115                   | 48  | 56  | 11            | 0.592         | 0.644          |
|                     |                       |                      |                        |          | 347                   | 145 | 157 | 45            |               |                |
| 16 rs3756577        | 44898                 | 22.7                 | CON                    | 376      | 147                   | 174 | 55  | 0.696         | 0.391         |                |
|                     |                       |                      |                        |          | 115                   | 48  | 56  | 11            | 0.592         | 0.644          |
|                     |                       |                      |                        |          | 347                   | 145 | 157 | 45            |               |                |
| 17 rs4958454        | 46790                 | 41.4                 | SCZ                    | 379      | 132                   | 173 | 74  | 0.415         | 0.796         |                |
|                     |                       |                      |                        |          | 105                   | 39  | 44  | 22            | 0.297         | 0.774          |
|                     |                       |                      |                        |          | 344                   | 109 | 174 | 61            |               |                |
| 18 rs 869192        | 47931                 | 35.2                 | BP                     | 376      | 149                   | 163 | 64  | 0.509         | 0.277         |                |
|                     |                       |                      |                        |          | 115                   | 43  | 51  | 21            | 0.927         | 0.776          |
|                     |                       |                      |                        |          | 347                   | 123 | 160 | 64            |               |                |
| 19 rs10066581       | 57861                 | 21                   | CON                    | 376      | 149                   | 163 | 64  | 0.509         | 0.277         |                |
|                     |                       |                      |                        |          | 115                   | 43  | 51  | 21            | 0.927         | 0.776          |
|                     |                       |                      |                        |          | 347                   | 123 | 160 | 64            |               |                |
| 20 rs3822607        | 61749                 | 40.6                 | SCZ                    | 376      | 236                   | 117 | 23  | <b>0.0213</b> | 0.164         |                |
|                     |                       |                      |                        |          | 115                   | 69  | 39  | 7             | 0.0817        | 0.155          |
|                     |                       |                      |                        |          | 347                   | 224 | 116 | 7             |               |                |
| 21 rs2053053        | 64149                 | 18.0                 | BP                     | 376      | 109                   | 185 | 82  | 0.202         | 0.294         |                |
|                     |                       |                      |                        |          | 115                   | 36  | 61  | 18            | 0.916         | 0.693          |
|                     |                       |                      |                        |          | 347                   | 102 | 187 | 58            |               |                |
| 22 rs7711408        | 692680                | 31.2                 | CON                    | 376      | 109                   | 185 | 82  | 0.202         | 0.294         |                |
|                     |                       |                      |                        |          | 115                   | 36  | 61  | 18            | 0.916         | 0.693          |
|                     |                       |                      |                        |          | 347                   | 102 | 187 | 58            |               |                |
| 23 rs2241695        | 70718                 | 32.8                 | SCZ                    | 376      | 274                   | 89  | 13  | 0.275         | 0.555         |                |
|                     |                       |                      |                        |          | 115                   | 75  | 33  | 7             | 0.133         | 0.165          |
|                     |                       |                      |                        |          | 347                   | 241 | 98  | 8             |               |                |
| 24 rs2241694        | 70934                 | 13.3                 | BP                     | 376      | 182                   | 156 | 38  | 0.204         | 0.507         |                |
|                     |                       |                      |                        |          | 115                   | 46  | 52  | 17            | <b>0.0195</b> | <b>0.0210</b>  |
|                     |                       |                      |                        |          | 347                   | 167 | 157 | 23            |               |                |
| 25 rs957709         | 71716                 | 16.4                 | CON                    | 376      | 182                   | 156 | 38  | 0.204         | 0.507         |                |
|                     |                       |                      |                        |          | 115                   | 46  | 52  | 17            | <b>0.0195</b> | <b>0.0210</b>  |
|                     |                       |                      |                        |          | 347                   | 167 | 157 | 23            |               |                |
| 26 rs887346         | 77550                 | 22.7                 | SCZ                    | 376      | 178                   | 166 | 32  | 0.867         | 0.734         |                |
|                     |                       |                      |                        |          | 115                   | 43  | 56  | 16            | 0.124         | 0.0558         |
|                     |                       |                      |                        |          | 347                   | 158 | 160 | 29            |               |                |
| 27 rs2241694        | 70934                 | 13.3                 | BP                     | 376      | 264                   | 97  | 15  | <b>0.0358</b> | <b>0.0303</b> |                |
|                     |                       |                      |                        |          | 115                   | 79  | 33  | 3             | 0.213         | 0.116          |
|                     |                       |                      |                        |          | 347                   | 262 | 81  | 4             |               |                |
| 28 rs887346         | 77550                 | 22.7                 | CON                    | 376      | 178                   | 166 | 32  | 0.867         | 0.734         |                |
|                     |                       |                      |                        |          | 115                   | 43  | 56  | 16            | 0.124         | 0.0558         |
|                     |                       |                      |                        |          | 347                   | 158 | 160 | 29            |               |                |
| 29 rs2241694        | 70934                 | 13.3                 | SCZ                    | 376      | 264                   | 97  | 15  | <b>0.0358</b> | <b>0.0303</b> |                |
|                     |                       |                      |                        |          | 115                   | 79  | 33  | 3             | 0.213         | 0.116          |
|                     |                       |                      |                        |          | 347                   | 262 | 81  | 4             |               |                |
| 30 rs887346         | 77550                 | 22.7                 | BP                     | 376      | 179                   | 160 | 37  | 0.305         | 0.134         |                |
|                     |                       |                      |                        |          | 115                   | 46  | 54  | 15            | <b>0.0331</b> | <b>0.00967</b> |
|                     |                       |                      |                        |          | 347                   | 181 | 141 | 25            |               |                |

- a. Gray box represents 'haplotype-tagging (ht) SNPs' for association analysis
- b. NT029289.10
- c. MAF=minor allele frequency of 64 controls
- d. SCZ=schizophrenia, BP=bipolar disorder, CON=control
- e. M=major allele, m=minor allele
- f. Bold numbers represent significant P-values

B

| Block | Combination of htSNPs | Global P-value <sup>a</sup> |               |
|-------|-----------------------|-----------------------------|---------------|
|       |                       | SCZ                         | BP            |
| II    | SNP7-8                | 0.891                       | 0.185         |
| III   | SNP11-15              | 0.791                       | 0.344         |
| IV    | SNP17-18              | 0.287                       | 0.461         |
| V     | SNP19-20              | 0.429                       | 0.102         |
| VI    | SNP21-22-23-24        | 0.252                       | <b>0.0015</b> |

a. Bold numbers represent significant P-values

C

| SNPID         | phenotype | Number | genotype |     |     | P-value  |        |       |
|---------------|-----------|--------|----------|-----|-----|----------|--------|-------|
|               |           |        | M/M      | M/m | m/m | genotype | allele |       |
| 3 rs919740    | BP        | 382    | 108      | 204 | 55  | 0.455    | 0.871  |       |
|               |           |        | 149      | 43  | 80  | 26       | 0.860  | 0.745 |
|               |           |        | 382      | 119 | 196 | 67       |        |       |
| 19 rs10066581 | CON       | 380    | 224      | 117 | 16  | 0.273    | 0.293  |       |
|               |           |        | 149      | 95  | 50  | 4        | 0.140  | 0.117 |
|               |           |        | 380      | 225 | 128 | 27       |        |       |
| 21 rs2053053  | BP        | 382    | 268      | 95  | 4   | 0.211    | 0.294  |       |
|               |           |        | 149      | 93  | 54  | 2        | 0.0520 | 0.173 |
|               |           |        | 382      | 271 | 100 | 11       |        |       |
| 22 rs7711408  | CON       | 368    | 197      | 145 | 26  | 0.222    | 0.0878 |       |
|               |           |        | 149      | 66  | 69  | 14       | 0.631  | 0.589 |
|               |           |        | 381      | 184 | 159 | 38       |        |       |
| 23 rs2241695  | BP        | 367    | 172      | 164 | 31  | 0.110    | 0.169  |       |
|               |           |        | 149      | 69  | 65  | 15       | 0.609  | 0.486 |
|               |           |        | 378      | 170 | 158 | 50       |        |       |
| 24 rs2241694  | CON       | 366    | 282      | 75  | 9   | 0.0922   | 0.0529 |       |
|               |           |        | 149      | 112 | 29  | 8        | 0.0690 | 0.651 |
|               |           |        | 382      | 268 | 104 | 10       |        |       |
| 26 rs887346   | BP        | 370    | 176      | 148 | 46  | 0.772    | 0.946  |       |
|               |           |        | 149      | 69  | 64  | 16       |        |       |
|               |           |        | 370      | 176 | 148 | 46       |        |       |

## Supplementary Table Legends

**Table S1. List of genes that were significantly upregulated or downregulated in the hippocampus of alpha-CaMKII<sup>+/-</sup> mice.**

**Table S2. Gene Ontology annotations of the genes that were significantly upregulated or downregulated in the hippocampus of alpha-CaMKII<sup>+/-</sup> mice.**

**Table S3. Donors offering hippocampi for GeneChip analysis.** Expression data from total 166 hippocampi were used in BioExpress database including additional 98 donors with various CNS-related illness. A, Cluster A in Figure 5 (normal control-enriched cluster); B, Cluster B (schizophrenic psychiatric patient-enriched cluster).

**Table S4. Affymetrix probes used as alpha-CaMKII<sup>+/-</sup> mice-specific hippocampal biomarkers.** F value was calculated to segregate 21 schizophrenic or its related psychiatric patients shown in Additional Table 3 from the rest of 145 donors.

**Table S5. Association analysis of alpha-CaMKII gene with schizophrenia and bipolar disorder.** (A) Summary of haplotype-tagging single nucleotide polymorphisms (htSNPs) and association analysis of alpha-CaMKII in first-set samples. (B) Haplotype-wise analysis of first-set samples. (C) Summary of the second-set confirmation analysis of significant htSNPs in first-set samples.
